# Supplementary material for: The Structure of Blood Coagulation Factor XIII Is Adapted to Oxidation
Source: PubMed Central journal article supplement (PMC7355775; doi:10.3390/biom10060914), 2020-06-17
Supplement: biomolecules-10-00914-s001.pdf [file biomolecules-10-00914-s001.pdf]

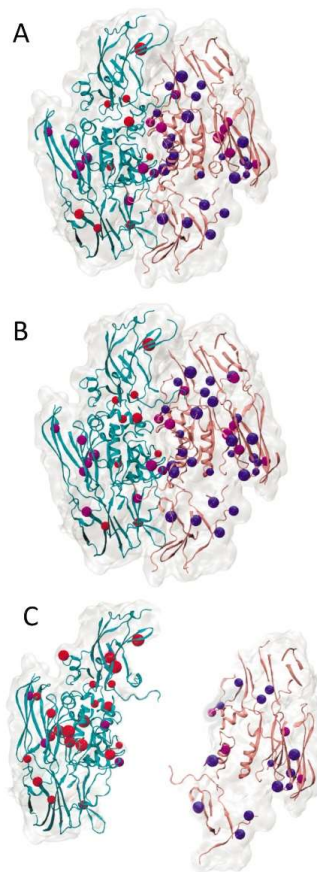

**Figure S1.** The presentation of the catalytic FXIII-subunit dimer crystal structure (PDB ID: 1F13) with the oxidative modifications detected in the oxidized samples: FXIII-A<sub>2</sub>B<sub>2</sub> (A); FXIII-A<sub>2</sub>B<sub>2</sub> + Ca<sup>2+</sup> (B); and FXIII-A<sub>2</sub>B<sub>2</sub> + Ca<sup>2+</sup>/thrombin (C). The left monomer represents the catalytic subunit structure of FXIII treated with 150  $\mu$ M hypochlorite. The covered sequences of the structural elements are colored blue; the non-covered sequences are not shown. The amino acid residues damaged by hypochlorite are drawn in red balls. The right monomer is the catalytic subunit structure of FXIII (colored pink) treated with 1 $\mu$ M of ozone per 1 mg of the protein. The amino acid residues damaged by ozone are shown in blue balls. The purple balls represent the positions of shared residues involved in oxidative damage when the protein was treated with ozone or hypochlorite.

**Table S1.** The list of identified peptides containing oxidatively modified residues in the FXIII subunits. Various modifications of amino acid residues characterized by a certain mass are shown. Modifications with a low (<100) Ascore value, as well as modifications having quantitative values of less than 1%, are not considered in Table S1. The oxidation degree (%) of the modified peptides normalized to the total areas of the peaks of unmodified and modified peptides (estimated modification levels). For each series of samples, as above mentioned, three biological replicates were carried out, for each of which the measurements were done in triplicate to ensure that the obtained data are reliable and reproducible.

| Oxidized peptides                                                                                                                       | Oxidized amino acid residue | Modification type                  | Oxidation degree, % |                |                 |                          |                                   |                                    |                                |                                      |                                      | Structural part |
|-----------------------------------------------------------------------------------------------------------------------------------------|-----------------------------|------------------------------------|---------------------|----------------|-----------------|--------------------------|-----------------------------------|------------------------------------|--------------------------------|--------------------------------------|--------------------------------------|-----------------|
|                                                                                                                                         |                             |                                    | FXIII               | 50 μM oxFXI II | 150 μM oxFXI II | FXIII + Ca <sup>2+</sup> | 50 μM oxFXI II + Ca <sup>2+</sup> | 150 μM oxFXI II + Ca <sup>2+</sup> | FXIII + Ca <sup>2+</sup> /T hr | 50 μM FXIII + Ca <sup>2+</sup> /T hr | 150 μM FXIII + Ca <sup>2+</sup> /Thr |                 |
| <b>Chain A</b>                                                                                                                          |                             |                                    |                     |                |                 |                          |                                   |                                    |                                |                                      |                                      |                 |
| K.ERW(+13.98)DTNKVDHHTDKYENNK.L                                                                                                         | Trp 57                      | Tryptophan oxidation to oxolactone | n/m                 | n/m            | n/m             | n/m                      | n/m                               | n/m                                | n/m                            | n/m                                  | 1-20%                                | 1-20%           |
| K.ERW(+3.99)DTNK(+42.01)VDHHTDKYENNK.L                                                                                                  |                             | Tryptophan oxidation to kynurenin  | n/m                 | n/m            | n/m             | n/m                      | n/m                               | n/m                                | n/m                            | n/m                                  | n/m                                  | 1-20%           |
| K.GTYIPVPIVSELQSGKW(+15.99)GAK.I<br>I.PVPIVSELQSGKW(+15.99)GAK.I<br>V.PIVSELQSGKW(+15.99)GAK.I                                          | Trp 130                     | Oxidation                          | n/c                 | n/c            | n/m             | n/c                      | n/c                               | n/m                                | n/c                            | n/c                                  | 80-100%                              | 60-80%          |
| R.LSIQSSPKC(+47.98)IVGK.F                                                                                                               | Cys 152                     | Trioxidation                       | n/c                 | 40-60%         | 80-100%         | n/c                      | n/c                               | 80-100%                            | n/c                            | n/c                                  | n/c                                  | 60-80%          |
| R.LSIQSSP(+31.99)KC(+15.99)IVGK.F<br>R.LSIQSSPK(+31.99)C(+15.99)IVGK.F<br>R.LSIQSSP(+15.99)KC(+15.99)IVGK.F                             |                             | Oxidation                          | n/c                 | n/m            | n/m             | n/c                      | n/c                               | n/m                                | n/c                            | n/c                                  | 20-40%                               | 1-20%           |
| R.M(+15.99)YVAVWTPYGVLR.T<br>R.M(+15.99)YVAVW(+15.99)TPYGVLR.T                                                                          |                             | Met 159                            | Oxidation           | n/m            | n/m             | n/m                      | n/m                               | n/m                                | n/m                            | n/m                                  | n/m                                  | 1-20%           |
| R.MYVAVW(+15.99)TPYGVLR.T<br>R.M(+15.99)YVAVW(+15.99)TPYGVLR.T<br>R.MY(-2.02)VAVW(+15.99)TPYGVLR.T<br>R.MY(+15.99)VAVW(+15.99)TPYGVLR.T | Trp 164                     | Oxidation                          | n/m                 | 1-20%          | 1-20%           | n/m                      | 1-20%                             | 1-20%                              | n/m                            | 1-20%                                | 1-20%                                | 20-40%          |
| R.NPETDTYILFNP(+31.99)W(+15.99)CEDDAVYLDNEK.E                                                                                           | Trp 187                     | Oxidation                          | n/c                 | n/m            | 1-20%           | n/c                      | 1-20%                             | 1-20%                              | n/c                            | 20-40%                               | 20-                                  | Catalytic       |

|                                                                           |                                |        |        |        |        |         |        |     |        |        |      |
|---------------------------------------------------------------------------|--------------------------------|--------|--------|--------|--------|---------|--------|-----|--------|--------|------|
| R.NPETDTYILFNP(+31.99)W(+15.99)CEDDAVYLDNEKER.E                           |                                |        |        |        |        |         |        |     |        | 40%    | core |
| R.NPETDTYILFNP(+15.99)W(+15.99)C(+15.99)EDDAVYLDNEK.E                     |                                |        |        |        |        |         |        |     |        |        |      |
| R.NPETDTYILFNPW(+15.99)C(+31.99)EDDAVYLDNEK.E                             |                                |        |        |        |        |         |        |     |        |        |      |
| R.NPETDTYILFNPW(+15.99)C(+15.99)ED(+15.99)DAVYLDNEK.E                     |                                |        |        |        |        |         |        |     |        |        |      |
| R.NPETDTYILFNPWC(+47.98)EDDAVYLDNEK.E                                     |                                |        |        |        |        |         |        |     |        |        |      |
| R.NPETDTYILFNPWC(+47.98)EDDAVYLDNEKER.E                                   |                                |        |        |        |        |         |        |     |        |        |      |
| R.NPETDTYILFNPWC(+47.98)EDDAVYLDNEKEREYVLDIGVIFYGEV<br>NDIK.T             | Trioxidation                   | n/c    | 60-80% | 60-80% | n/c    | 40-60%  | 60-80% | n/c | 20-40% | 60-80% |      |
| Y.ILFNPWC(+47.98)EDDAVYLDNEK.E                                            |                                |        |        |        |        |         |        |     |        |        |      |
| R.NPETDTYILFNPWC(+15.99)ED(+15.99)DAVYLDNEK.E                             |                                |        |        |        |        |         |        |     |        |        |      |
| R.NPETDTYILFNP(+31.99)WC(+15.99)EDDAVYLDNEK.E                             | Cys 188                        |        |        |        |        |         |        |     |        |        |      |
| R.NPETDTYILFNP(+15.99)WC(+15.99)ED(+15.99)DAVYLDNEK.E                     |                                |        |        |        |        |         |        |     |        |        |      |
| R.NPETDTYILFNPW(+31.99)C(+15.99)EDDAVYLDNEKEREYVLDIGVIFYGEVNDIK.T         | Oxidation                      | n/c    | 1-20%  | 1-20%  | n/c    | 1-20%   | 1-20%  | n/c | 20-40% | n/m    |      |
| R.NPETDTYILFN(+15.99)P(+15.99)WC(+15.99)EDDAVYLDNEKEREYVLDIGVIFYGEVNDIK.T |                                |        |        |        |        |         |        |     |        |        |      |
| R.NPETDTYILFNPWC(+15.99)EDDAVYLDNEK(+31.99).E                             |                                |        |        |        |        |         |        |     |        |        |      |
| R.NPETDTYILFN(+15.99)PWC(+15.99)EDD(+15.99)AVYLDNEK.E                     |                                |        |        |        |        |         |        |     |        |        |      |
| R.SWSYGQFEDGILDTC(+47.98)LYVMD(+15.99).R.A                                |                                |        |        |        |        |         |        |     |        |        |      |
| R.SWSYGQFEDGILDTC(+47.98)LYVMDR(+15.99).A                                 |                                |        |        |        |        |         |        |     |        |        |      |
| R.SWSY(+15.99)QFEDGILDTC(+47.98)LYVMD(+15.99).R.A                         |                                |        |        |        |        |         |        |     |        |        |      |
| R.SWSYGQFEDGILDTC(+47.98)LY(-2.02)VMDR.A                                  | Trioxidation                   | n/c    | n/m    | n/c    | n/c    | n/m     | n/m    | n/c | n/m    | 40-60% |      |
| R.SW(+15.99)SYGQFEDGILDTC(+47.98)LYVMDR(+15.99).A                         | Cys 238                        |        |        |        |        |         |        |     |        |        |      |
| R.SWSYGQFEDGILDTC(+47.98)LYVM(+15.99)DR.A                                 |                                |        |        |        |        |         |        |     |        |        |      |
| R.SWSYGQFEDGILDTC(-33.99)LYVM(+15.99)DR.A                                 | Dehydroalanine (from Cysteine) | n/c    | n/m    | n/c    | n/c    | n/m     | 40-60% | n/c | n/m    | 1-20%  |      |
| R.SWSY(+31.99)GQFEDGILDTC(-33.99)LY.V                                     |                                |        |        |        |        |         |        |     |        |        |      |
| R.SWSYGQFEDGILDTCCLYVM(+31.99)D(+15.99)RA.Q                               | Dioxidation                    | n/m    | n/m    | n/c    | n/m    | 80-100% | n/c    | n/m | n/m    | n/m    |      |
| R.SWSYGQFEDGILDTC(+47.98)LYVM(+15.99)DR.A                                 |                                |        |        |        |        |         |        |     |        |        |      |
| R.SWSYGQFEDGILDTC(-33.99)LYVM(+15.99)DR.A                                 | Met 242                        |        |        |        |        |         |        |     |        |        |      |
| R.SWSYGQFEDGILDTC(+31.99)LYVM(+15.99)DRA.C                                | Oxidation                      | 20-40% | 1-20%  | n/c    | 40-60% | n/m     | n/c    | n/m | n/m    | 1-20%  |      |
| C.LYVM(+15.99)DR.A                                                        |                                |        |        |        |        |         |        |     |        |        |      |
| K.VSRVGSAM(+15.99)VNAK.D                                                  | Met 265                        |        |        |        |        |         |        |     |        |        |      |
| Oxidation                                                                 | n/m                            | n/c    | n/c    | n/m    | n/c    | n/c     | n/c    | n/m | n/q    | n/q    |      |
| Y.GVPPSAW(+15.99)TGSVDILLEYS                                              | Trp 292                        |        |        |        |        |         |        |     |        |        |      |
| Oxidation                                                                 | n/m                            | n/m    | n/m    | n/m    | n/m    | n/m     | n/m    | n/m | n/m    | 1-20%  |      |
| R.Y(+33.96)GQC(+67.92)WVFAGVFNTFLR.C                                      |                                |        |        |        |        |         |        |     |        |        |      |
| R.Y(+33.96)GQC(+47.98)W(+19.99)VFAGVFNTFLR.C                              | Tyr 311                        |        |        |        |        |         |        |     |        |        |      |
| Chlorination of tyrosine residues                                         | n/c                            | n/m    | n/m    | n/c    | n/m    | n/m     | n/c    | n/m | n/m    | 1-20%  |      |
| R.YGQC(+47.98)WVFAGVFNTFLR.C                                              |                                |        |        |        |        |         |        |     |        |        |      |
| R.Y(+33.96)GQC(+47.98)W(+19.99)VFAGVFNTFLR.C                              | Cys 314                        |        |        |        |        |         |        |     |        |        |      |
| R.YGQC(+47.98)W(+15.99)VFAGVFNTFLR.C                                      | Trioxidation                   | n/c    | n/q    | n/q    | n/c    | n/q     | n/q    | n/c | n/q    | n/q    |      |

|                                                                                                                                                                                                                                                                                                                                                                                                                                                                                                                                                           |                |                                                   |       |        |        |       |        |        |       |         |         |  |
|-----------------------------------------------------------------------------------------------------------------------------------------------------------------------------------------------------------------------------------------------------------------------------------------------------------------------------------------------------------------------------------------------------------------------------------------------------------------------------------------------------------------------------------------------------------|----------------|---------------------------------------------------|-------|--------|--------|-------|--------|--------|-------|---------|---------|--|
| R.YGQC(+47.98)W(+31.99)VFAGVFNTFLR.C                                                                                                                                                                                                                                                                                                                                                                                                                                                                                                                      |                |                                                   |       |        |        |       |        |        |       |         |         |  |
| R.YGQC(+47.98)W(+15.99)VFAGVFNTFLR.C                                                                                                                                                                                                                                                                                                                                                                                                                                                                                                                      |                | Oxidation                                         | n/c   | n/m    | n/m    | n/c   | n/m    | n/m    | n/c   | 1-20%   | 1-20%   |  |
| R.Y(+33.96)GQC(+47.98)W(+19.99)VFAGVFNTFLR.C                                                                                                                                                                                                                                                                                                                                                                                                                                                                                                              | <b>Trp 315</b> | Tryptophan oxidation to hydroxykynurenin          | n/c   | n/m    | n/m    | n/c   | n/m    | n/m    | n/c   | n/m     | n/q     |  |
| R.IVTNYFSAHDNDANLQM(+15.99)DIFLEEDGNVNSK.L<br>R.IVTNYFSAHDNDANLQM(+15.99)DIFLEEDGNVNSKLT.K.D<br>R.IVTNYFSAHDNDANLQM(+15.99).D<br>R.IVTNYFSAHDNDANLQM(+15.99)DIF.L<br>Y.FSAHDNDANLQM(+15.99)DIFLEEDGNVNSK.L<br>F.SAHDNDANLQM(+15.99)DIFLEEDGNVNSK.L<br>H.DNDANLQM(+15.99)DIFLEEDGNVNSK.L<br>D.ANLQM(+15.99)DIFLEEDGNVNSK.L                                                                                                                                                                                                                                 |                | Oxidation                                         | 1-20% | 40-60% | 40-60% | 1-20% | 20-40% | 40-60% | 1-20% | 80-100% | 60-80%  |  |
| R.IVTNYF(+31.99)SAHDN(+15.99)DANLQM(-48.00)DIFLEEDGNVNSK.L<br>R.IVTNYF(+31.99)SAHDN(+15.99)ANLQM(-48.00)DIFLEEDGNVNSK.L<br>R.IVTNYF(+31.99)SAHD(+15.99)NDANLQM(-48.00)DIFLEEDGNVNSK.L<br>R.IVTNYFSAHDNDANLQM(-48.00)D(+15.99)IF(+31.99)LEEDGNVNSK.L<br>R.IVTNY(+31.99)FSAHDNDAN(+15.99)LQM(-48.00)DIFLEEDGNVNSK.L<br>R.IVTN(+15.99)YF(+31.99)SAHDNDANLQM(-48.00)DIFLEEDGNVNSK.L<br>R.IVTNY(+15.99)F(+31.99)SAHDNDANLQM(-48.00)DIFLEEDGNVNSK.L<br>R.IVTN(+15.99)Y(+31.99)FSAHDNDANLQM(-48.00)DIFLEEDGNVNSK.L<br>R.IVTNYFSAHDNDANLQM(+31.99)DIFLEEDGNVNSK.L | <b>Met 350</b> | Prompt loss of side chain from oxidised Metionine | 1-20% | n/m    | n/m    | 1-20% | n/m    | n/m    | 1-20% | n/m     | n/m     |  |
| F.GGW(+15.99)QAVDSTPQENS DGM(+15.99)YR.C                                                                                                                                                                                                                                                                                                                                                                                                                                                                                                                  | <b>Trp 392</b> | Oxidation                                         | n/m   | n/m    | n/m    | n/m   | n/m    | n/m    | n/m   | n/m     | 1-20%   |  |
| M.TRPDLPVGF GGWQAVDSTPQENS DGM(+15.99)YR.C<br>M.T(-2.02)RPDLPVGF GGWQAVDSTPQENS DGM(+15.99)YR.C<br>R.PDLPVGF GGWQAVDSTPQENS DGM(+15.99)YR.C<br>G.FGGWQAVDSTPQENS DGM(+15.99)YR.C<br>F.GGWQAVDSTPQENS DGM(+15.99)YR.C<br>F.GGW(+15.99)QAVDSTPQENS DGM(+15.99)YR.C<br>G.W(+31.99)QAVDSTPQENS DGM(+15.99)YR.C<br>W.QAVDSTPQENS DGM(+15.99)YR.C<br>Q.AVDSTPQENS DGM(+15.99)YR.C<br>V.DSTPQENS DGM(+15.99)YR.C<br>D.STPQENS DGM(+15.99)YR.C<br>T.PQENS DGM(+15.99)YR.C                                                                                         | <b>Met 406</b> | Oxidation                                         | 1-20% | 40-60% | 40-60% | 1-20% | 40-60% | 40-60% | 1-20% | 80-100% | 80-100% |  |
| K.HGHVC(+47.98)FQFDAPFVFAEVNSDLIYTAK.K<br>K.HGH(+15.99)VC(+47.98)FQFDAPFVFAEVNSDLIYTAK.K                                                                                                                                                                                                                                                                                                                                                                                                                                                                  | <b>Cys 423</b> | Trioxidation                                      | n/c   | 40-60% | 20-40% | n/m   | 40-60% | 60-80% | n/c   | 80-100% | 80-100% |  |



|                                                                                                                                                                                                                                                                                                                                                                                                                                                                                                                                                                                                                                                                                                                                                                                                                                                                                             |                |                                                               |       |        |        |       |        |        |       |        |         |        |                   |       |
|---------------------------------------------------------------------------------------------------------------------------------------------------------------------------------------------------------------------------------------------------------------------------------------------------------------------------------------------------------------------------------------------------------------------------------------------------------------------------------------------------------------------------------------------------------------------------------------------------------------------------------------------------------------------------------------------------------------------------------------------------------------------------------------------------------------------------------------------------------------------------------------------|----------------|---------------------------------------------------------------|-------|--------|--------|-------|--------|--------|-------|--------|---------|--------|-------------------|-------|
| K.KPLNTEGVM(-48.00)K.S<br>K.KPLN(+.98)TEGVM(-48.00)K.S<br>K.KPLNTEGVM(-48.00)K(+15.99).S<br>K.KPLNTEGVM(-48.00)K(+31.99)SR(+31.99).S<br>K.PLNTEGVM(-48.00)K.S                                                                                                                                                                                                                                                                                                                                                                                                                                                                                                                                                                                                                                                                                                                               |                | Prompt loss<br>of side chain<br>from<br>oxidised<br>Metionine | n/m   | 1-20%  | 1-20%  | n/m   | 1-20%  | 1-20%  | n/m   | 1-20%  | 1-20%   | 1-20%  | 1-20%             | 1-20% |
| R.SNVDM(+15.99)DFEVENAVLGK.D<br>R.SNVDM(+15.99)DFEVENAVLGKDFK.L<br>R.SNVDM(+15.99)DF.E                                                                                                                                                                                                                                                                                                                                                                                                                                                                                                                                                                                                                                                                                                                                                                                                      | <b>Met 520</b> | Oxidation                                                     | n/m   | 1-20%  | 1-20%  | n/m   | 1-20%  | 1-20%  | n/m   | 1-20%  | 1-20%   | 1-20%  | 20-40%            |       |
| K.KEAVLIQAGEYM(+15.99)GQLLEQASLHFFVTAR.I<br>K.EAVLIQAGEYM(+15.99)GQLLEQASLHF.F<br>K.EAVLIQAGEYM(+15.99)GQLLEQASLH.F<br>K.EAVLIQAGEYM(+15.99)GQLLEQASLHFF.V<br>K.EAVLIQAGEYM(+15.99)GQLLEQASLHFFVTAR.I<br>K.EAVLIQAGEYM(+15.99)GQLLEQA.S<br>K.EAVLIQAGEYM(+15.99)GQLLEQASLHFFVT.A<br>K.EAVLIQAGEYM(+15.99)GQLLEQASL.H<br>K.EAVLIQAGEYM(+15.99)GQLLE.Q<br>K.EAVLIQAGEYM(+15.99)GQLLEQASLHFFVTA.R<br>K.EAVLIQAGEY(+33.96)M(+15.99)GQLLEQASLHFFVTAR.I<br>K.EAVLIQ(+.98)AGEYM(+15.99)GQLLEQASLH.F<br>K.EAVLIQAGEYM(+15.99)GQLLEQ.A<br>K.EAVLIQ(+.98)AGEYM(+15.99)GQLLEQASLHFFVTAR.I<br>V.LIQAGEYM(+15.99)GQLLEQASLHFFVTAR.I<br>L.IQAGEYM(+15.99)GQLLEQASLHFFVTAR.I<br>I.QAGEYM(+15.99)GQLLEQASLHFFVTAR.I<br>I.Q(+.98)AGEYM(+15.99)GQLLEQASLHFFVTAR.I<br>Q.AGEYM(+15.99)GQLLEQASLHFFVTAR.I<br>A.GEYM(+15.99)GQLLEQASLHFFVTAR.I<br>E.YM(+15.99)GQLLEQASLHFFVTAR.I<br>Y.M(+15.99)GQLLEQASLHFFVTAR.I | <b>Met 595</b> | Oxidation                                                     | n/m   | 20-40% | 40-60% | n/m   | 40-60% | 20-40% | n/m   | 60-80% | 80-100% |        | <b>β-barrel 1</b> |       |
| R.GTQVVGSDM(+15.99)TVTQFTNPLK.E<br>R.GTQVVGSDM(+15.99)TVTQ(+.98)FTNPLK.E<br>R.GTQVVGSDM(+15.99)TVTQFTN(+.98)PLK.E<br>R.GTQVVGSDM(+15.99)TVTQFTNP(-27.99)LK(+42.01).E                                                                                                                                                                                                                                                                                                                                                                                                                                                                                                                                                                                                                                                                                                                        | <b>Met 646</b> | Oxidation                                                     | 1-20% | 1-20%  | 1-20%  | 1-20% | 1-20%  | 1-20%  | 1-20% | n/m    | 60-80%  | 60-80% |                   |       |
| R.GTQVVGSDMTVTQFTNP(-27.99)LK(+42.01).E                                                                                                                                                                                                                                                                                                                                                                                                                                                                                                                                                                                                                                                                                                                                                                                                                                                     | <b>Pro 655</b> | Pyrrolidone<br>from Proline                                   | n/m   | n/m    | n/m    | n/m   | n/m    | n/m    | n/m   | n/m    | 1-20%   | 1-20%  | <b>β-barrel 2</b> |       |
| R.NVWVHLDGPGVTRPM(+15.99)K.K<br>R.NVWVHLDGPGVTRPM(+15.99).K<br>R.NVWVHLDGPGVTRPM(+15.99)KK.M<br>R.NVW(+15.99)VHLDGPGVTRPM(+15.99)K.K<br>R.NVW(+15.99)VHLDGPGVTRPM(+15.99)KK.M                                                                                                                                                                                                                                                                                                                                                                                                                                                                                                                                                                                                                                                                                                               | <b>Met 676</b> | Oxidation                                                     | 1-20% | 20-40% | 60-80% | 1-20% | 1-20%  | 20-40% | 1-20% | 1-20%  | 1-20%   | 20-40% |                   |       |

|                                               |         |                                                   |       |        |        |       |        |        |        |         |         |                |
|-----------------------------------------------|---------|---------------------------------------------------|-------|--------|--------|-------|--------|--------|--------|---------|---------|----------------|
| R.NVW(+31.99)VHLDGPGVTRPM(+15.99)KK.M         |         |                                                   |       |        |        |       |        |        |        |         |         |                |
| R.N(+15.99)VW(+15.99)VHLDGPGVTRPM(+15.99)KK.M |         |                                                   |       |        |        |       |        |        |        |         |         |                |
| V.WVHLDGPGVTRPM(+15.99)K.K                    |         |                                                   |       |        |        |       |        |        |        |         |         |                |
| V.WVHLDGPGVTRPM(+15.99)KK.M                   |         |                                                   |       |        |        |       |        |        |        |         |         |                |
| W.VHLDGPGVTRPM(+15.99)K.K                     |         |                                                   |       |        |        |       |        |        |        |         |         |                |
| W.VHLDGPGVTRPM(+15.99)KK.M                    |         |                                                   |       |        |        |       |        |        |        |         |         |                |
| V.HLDGPGVTRPM(+15.99)K.K                      |         |                                                   |       |        |        |       |        |        |        |         |         |                |
| V.HLDGPGVTRPM(+15.99)KK.M                     |         |                                                   |       |        |        |       |        |        |        |         |         |                |
| H.LDGPGVTRPM(+15.99)K.K                       |         |                                                   |       |        |        |       |        |        |        |         |         |                |
| L.DGPGVTRPM(+15.99)KK.M                       |         |                                                   |       |        |        |       |        |        |        |         |         |                |
| D.GPGVTRPM(+15.99)K.K                         |         |                                                   |       |        |        |       |        |        |        |         |         |                |
| G.PGVTRPM(+15.99)K.K                          |         |                                                   |       |        |        |       |        |        |        |         |         |                |
| V.HLDGPGVTRPM(-48.00)KK.M                     |         |                                                   |       |        |        |       |        |        |        |         |         |                |
| V.HLDGPGVTRPM(-48.00)K.K                      |         | Prompt loss of side chain from oxidised Metionine | n/m   | n/m    | n/m    | n/m   | 1-20%  | 1-20%  | n/m    | n/m     | n/m     |                |
| R.EIRPNSTVQWEEVC(+47.98)RPWVSGHR.K            |         |                                                   |       |        |        |       |        |        |        |         |         |                |
| N.STVQWEEVC(+47.98)RPWVSGHR.K                 |         |                                                   |       |        |        |       |        |        |        |         |         |                |
| N.STVQWEEVC(+47.98)RP(+15.99)WVSGHR.K         | Cys 695 | Trioxidation                                      | n/c   | n/c    | n/c    | n/c   | n/c    | n/c    | n/c    | 40-60%  | 60-80%  |                |
| N.STVQWEEVC(+15.99)R(+31.99)PW(+15.99)VSGHR.K |         |                                                   |       |        |        |       |        |        |        |         |         |                |
| N.STVQW(+15.99)EEVC(+15.99)R(+31.99)PWVSGHR.K |         | Oxidation                                         | n/c   | n/c    | n/c    | n/c   | n/c    | n/c    | n/c    | n/m     | 1-20%   |                |
| R.KLIASM(+15.99)SSDSL.R.H                     |         |                                                   |       |        |        |       |        |        |        |         |         |                |
| K.LIASM(+15.99)SSDSL.R.H                      |         |                                                   |       |        |        |       |        |        |        |         |         |                |
| L.IASM(+15.99)SSDSL.R.H                       |         | Oxidation                                         | 1-20% | 1-20%  | 1-20%  | 1-20% | 1-20%  | 20-40% | 1-20%  | 80-100% | 80-100% |                |
| I.ASM(+15.99)SSDSL.R.H                        |         |                                                   |       |        |        |       |        |        |        |         |         |                |
| A.SM(+15.99)SSDSL.R.H                         |         |                                                   |       |        |        |       |        |        |        |         |         |                |
| R.KLIASM(+31.99)SSDSL.R.H                     |         |                                                   |       |        |        |       |        |        |        |         |         |                |
| K.LIASM(+31.99)SSDSL.R.H                      | Met 709 | Dioxidation                                       | 1-20% | n/m    | n/m    | 1-20% | n/m    | n/m    | n/m    | n/m     | n/m     |                |
| K.LIASM(-48.00)SSDSL.R.H                      |         |                                                   |       |        |        |       |        |        |        |         |         |                |
| A.SM(-48.00)SSDSL.R.H                         |         | Prompt loss of side chain from oxidised Metionine | n/m   | n/m    | n/m    | n/m   | n/m    | n/m    | n/m    | 1-20%   | 1-20%   |                |
| <b>Chain B</b>                                |         |                                                   |       |        |        |       |        |        |        |         |         |                |
| K.SFY(+33.96)FPMSIDK.K                        |         |                                                   |       |        |        |       |        |        |        |         |         |                |
| K.SFY(+33.96)FPM(+15.99)SIDKK.L               |         |                                                   |       |        |        |       |        |        |        |         |         |                |
| K.SFY(+33.96)FPM(+15.99)SIDK.K                | Tyr 26  | Chlorination of tyrosine residues                 | n/m   | n/m    | n/m    | n/m   | n/m    | n/m    | n/m    | n/m     | 1-20%   |                |
| K.SFY(+33.96)FP(+15.99)MSIDK.K                |         |                                                   |       |        |        |       |        |        |        |         |         |                |
| K.SFYFPM(+15.99)SIDKK.L                       |         |                                                   |       |        |        |       |        |        |        |         |         |                |
| K.SFYFPM(+15.99)SIDK.K                        | Met 29  | Oxidation                                         | 1-20% | 20-40% | 20-40% | 1-20% | 20-40% | 1-20%  | 20-40% | 40-60%  | 40-60%  |                |
|                                               |         |                                                   |       |        |        |       |        |        |        |         |         | <b>Sushi 1</b> |

|                                                                                                                                                                                                                                                                                                                        |                |                                                    |       |        |        |       |        |         |        |         |         |         |                |
|------------------------------------------------------------------------------------------------------------------------------------------------------------------------------------------------------------------------------------------------------------------------------------------------------------------------|----------------|----------------------------------------------------|-------|--------|--------|-------|--------|---------|--------|---------|---------|---------|----------------|
| K.SFY(+67.92)FPM(+15.99)SIDK.K<br>K.SFY(+33.96)FPM(+15.99)SIDKK.L<br>K.SFY(+33.96)FPM(+15.99)SIDK.K<br>S.FYFPM(+15.99)SIDK.K<br>F.YFPM(+15.99)SIDK.K                                                                                                                                                                   |                |                                                    |       |        |        |       |        |         |        |         |         |         |                |
| K.SFYFPM(+31.99)SIDKK.L<br>K.SFYFPM(+31.99)SIDK.K                                                                                                                                                                                                                                                                      |                | Dioxidation                                        | n/m   | n/m    | n/m    | n/m   | n/m    | n/m     | n/m    | 1-20%   | n/m     | n/m     |                |
| K.LSFF(+31.99)C(-33.99)LAGYTTESGR.Q                                                                                                                                                                                                                                                                                    | <b>Cys 39</b>  | Dehydroalanine (from Cysteine)                     | n/m   | n/m    | n/m    | n/m   | n/m    | n/m     | n/m    | n/m     | n/m     | 1-20%   |                |
| R.QEEQTTTC(-33.99)ITEGW(+31.99)SPEPR.C                                                                                                                                                                                                                                                                                 | <b>Cys 56</b>  | Dehydroalanine (from Cysteine)                     | n/m   | n/m    | n/m    | n/m   | n/m    | n/m     | n/m    | n/m     | 1-20%   | 1-20%   |                |
| K.I(+27.99)QEN(+.98)M(-48.00)RYGCASGYK.T                                                                                                                                                                                                                                                                               | <b>Met 94</b>  | Prompt loss of side chain from oxidised Methionine | n/m   | n/c    | n/c    | n/m   | n/c    | n/c     | n/m    | n/c     | n/c     | 80-100% | <b>Sushi 2</b> |
| K.VKD(+79.97)KVQYEC(-33.99)ATGYTAGGK.K<br>K.VKD(+43.99)KVQY(+67.92)EC(-33.99)ATGYTAGGK.K<br>K.VK(+43.99)DKVQY(+67.92)EC(-33.99)ATGYTAGGK.K<br>K.VKD(+79.97)KVQY(+44.99)EC(-33.99)ATGYTAGGK.K<br>K.VKDK(+43.99)VQY(+67.92)EC(-33.99)ATGYTAGGK.K<br>K.VKDKVQY(+79.97)EC(-33.99)ATGYTAGGK.K<br>K.VQYEC(-33.99)ATGYTAGGK.K | <b>Cys 160</b> | Dehydroalanine (from Cysteine)                     | n/c   | n/q    | n/q    | n/c   | n/q    | n/q     | n/c    | n/q     | n/q     | n/q     | <b>Sushi 3</b> |
| K.VKD(+43.99)K(-1.03)VQYEC(+47.98)ATGYTAGGK.K<br>K.VK(+14.96)DK(+27.99)VQYEC(+47.98)ATGYTAGGK.K<br>K.DKVQYEC(+47.98)ATGYTAGGK.K<br>K.DK(+42.01)VQY(+15.01)EC(+47.98)ATGYTAGGK.K<br>K.DK(+42.01)VQY(+15.01)EC(+47.98)ATGYTAGGK.T                                                                                        |                | Trioxidation                                       | n/c   | n/q    | n/q    | n/c   | n/q    | n/q     | n/c    | n/q     | n/q     | n/q     |                |
| K.SGYLLHGSNEITCNRGK(+43.01)W(+13.98)T.L                                                                                                                                                                                                                                                                                | <b>Trp 363</b> | Tryptophan oxidation to oxolactone                 | 1-20% | 40-60% | 20-40% | 1-20% | 20-40% | 20-40%  | 60-80% | 80-100% | 80-100% |         | <b>Sushi 6</b> |
| K.SGYLLHGSNEITCNR(-43.05)GKW(+19.99).T                                                                                                                                                                                                                                                                                 |                | Tryptophan oxidation to hydroxykynurenin           | n/m   | 1-20%  | n/m    | n/m   | n/m    | n/m     | n/m    | n/m     | n/m     |         |                |
| K.HPPVVM(+15.99)NGAVADGILASYATGSSVEYR.C<br>K.HPPVVM(+15.99)NGAVADGILASYATGSSVE.Y<br>K.HPPVVM(+15.99)N(+.98)GAVADGILASYATGSSVEYR.C<br>K.HPPVVM(+15.99)NGAVADGILASYATGS.S<br>K.HPPVVM(+15.99)NGAVADGILASY.A                                                                                                              | <b>Met 383</b> | Oxidation                                          | 1-20% | 60-80% | 60-80% | 1-20% | 40-60% | 80-100% | 1-20%  | 40-60%  | 60-80%  |         | <b>Sushi 7</b> |



|                                                                                                                                                                                                                                                                                                                                                                                                        |         |                                          |       |        |        |       |        |        |       |        |        |  |
|--------------------------------------------------------------------------------------------------------------------------------------------------------------------------------------------------------------------------------------------------------------------------------------------------------------------------------------------------------------------------------------------------------|---------|------------------------------------------|-------|--------|--------|-------|--------|--------|-------|--------|--------|--|
| K.HPPVVM(+15.99)N(+.98)GAVADGILASYATGSSVE.Y<br>K.HPPVVM(+15.99)NGAVADGIL.A<br>K.HPPVVM(+15.99)NGAVADGILAS.Y<br>K.H(-23.02)PPVVM(+15.99)NGAVAD(+79.97)GILASYATGSSVEYR.C<br>K.HPPVVM(+15.99)NGAVADGILASYA.T<br>K.HPPVVM(+15.99)NGAVAD.G<br>K.HPPVVM(+15.99)N.G<br>K.HPPVVM(+15.99)N(+.98)GAVAD.G<br>K.HPPVVM(+15.99)N(+.98)GAVADGILASYA.T<br>K.HPPVVM(+15.99)N(+.98)GAVADGILASYA.A<br>K.HPPVVM(+15.99).N |         |                                          |       |        |        |       |        |        |       |        |        |  |
| K.WSSPPVCLEPCT(-2.02)VNVVDYM(+15.99)NR.N<br>S.PPVCLEPCT(-2.02)VNVVDYM(+15.99)NR.N                                                                                                                                                                                                                                                                                                                      | Met 441 | Oxidation                                | 1-20% | 1-20%  | 20-40% | n/m   | 20-40% | 20-40% | 1-20% | 1-20%  | 1-20%  |  |
| R.NNIEM(+15.99)KW(+31.99)KYEGK.V<br>R.NNIEM(+15.99)KW(+15.99)K.Y<br>R.NNIEM(+15.99)K.W<br>R.NNIEM(+15.99)KW(+13.98)K.Y<br>R.NNIEM(+15.99)K(+42.01)W(+3.99)KYEGK.V<br>R.N(+15.99)NIEM(+15.99)K.W<br>R.NNIEM(+15.99)KWK(+15.99).Y<br>R.NNIEM(+15.99)KW(+15.99)K(+15.99)YEGK.V                                                                                                                            | Met 448 | Oxidation                                | 1-20% | 1-20%  | 1-20%  | 1-20% | 20-40% | 1-20%  | n/m   | 1-20%  | 20-40% |  |
| R.NNIEM(+31.99)KWKYEGK.V<br>R.NNIEM(+31.99)KW(+15.99)KYEGK.V<br>R.NNIEM(+31.99)K.W                                                                                                                                                                                                                                                                                                                     |         | Dioxidation                              | n/m   | n/m    | n/m    | 1-20% | n/m    | n/m    | n/m   | 20-40% | 1-20%  |  |
| R.NNIEMKW(+15.99)KYEGK.V<br>R.NNIEMKW(+15.99)K.Y<br>R.NNIEM(+15.99)KW(+15.99)K.Y<br>R.NNIEMK(+15.99)W(+15.99)K.Y<br>R.NNIEM(+31.99)KW(+15.99)KYEGK.V<br>R.NNIEM(+15.99)KW(+15.99)K(+15.99)YEGK.V<br>R.NNIEMKW(+15.99)K(+15.99)YEGK.V                                                                                                                                                                   |         | Oxidation                                | 1-20% | 40-60% | 60-80% | 1-20% | 40-60% | 40-60% | 1-20% | 60-80% | 60-80% |  |
| R.NNIEM(+15.99)KW(+13.98)K.Y                                                                                                                                                                                                                                                                                                                                                                           | Trp 450 | Tryptophan oxidation to oxolactone       | n/m   | 1-20%  | 1-20%  | n/m   | 1-20%  | 1-20%  | n/m   | 1-20%  | 1-20%  |  |
| R.NNIEM(+15.99)K(+42.01)W(+3.99)KYEGK.V<br>R.NNIEMK(+42.01)W(+3.99)KYEGK.V                                                                                                                                                                                                                                                                                                                             |         | Tryptophan oxidation to kynurenin        | n/m   | n/m    | n/m    | n/m   | n/m    | 1-20%  | n/m   | n/m    | n/m    |  |
| R.NNIEMK(+42.01)W(+19.99)KYEGK.V                                                                                                                                                                                                                                                                                                                                                                       |         | Tryptophan oxidation to hydroxykynurenin | n/m   | n/m    | n/m    | n/m   | 1-20%  | n/m    | n/m   | n/m    | n/m    |  |

Sushi 8

|                                              |         |                                        |     |     |     |     |     |     |       |     |       |       |
|----------------------------------------------|---------|----------------------------------------|-----|-----|-----|-----|-----|-----|-------|-----|-------|-------|
| K.QGYDLSPLTPLSELSVQC(-33.99)NRGEVK(+14.96).Y | Cys 485 | Dehydroalanine (from Cysteine)         | n/q | n/q | n/q | n/q | n/q | n/q | n/q   | n/q | n/q   | n/q   |
| S.PLTPLSELSVQC(-33.99)NRGEVK(+14.96).Y       |         |                                        |     |     |     |     |     |     |       |     |       |       |
| K.QGYDLSPLTPLSELSVQC(-33.99)NRGEVK(+14.96).Y | Lys 491 | Lysine oxidation to a-aminoadipic acid | n/q | n/q | n/q | n/q | n/q | n/q | n/q   | n/q | n/q   | n/q   |
| S.PLTPLSELSVQC(-33.99)NRGEVK(+14.96).Y       |         |                                        |     |     |     |     |     |     |       |     |       |       |
| K.NNLLLKW(+13.98)DFDNRPH.I                   | Trp 578 | Tryptophan oxidation to oxolactone     | n/m | n/m | n/m | n/m | n/m | n/m | 1-20% | n/m | 1-20% | 1-20% |
| K.NNLLLK(+42.01)W(+3.99)DFDNRPH.I            |         | Tryptophan oxidation to kynurenin      | n/m | n/c | n/m | n/m | n/m | n/m | 1-20% | n/m | 1-20% | n/m   |

Sushi 10

Notes:

- n/c — not detected in sequence (no coverage);
- n/m — no modifications found for this AAR;
- n/q — no quantitative data for this modification.

Table S2. Export data on peptides and modifications found by Peaks Studio 8.5.

| Protein Group | Protein ID | Protein Accession | Peptide                           | Unique | 101 gp | Mass      | Length | P/Peptide | m/z      | z | RT   | Intensity p13 | Intensity c13 | Intensity a13 | Intensity y p13_50 μM | Intensity y c13_50 μM | Intensity y a13_50 μM | Intensity p13_150 μM | Intensity y c13_150 μM | Intensity y a13_150 μM | Fraction | Scan     | Start | End | PTM                                | AScore                                                                   |
|---------------|------------|-------------------|-----------------------------------|--------|--------|-----------|--------|-----------|----------|---|------|---------------|---------------|---------------|-----------------------|-----------------------|-----------------------|----------------------|------------------------|------------------------|----------|----------|-------|-----|------------------------------------|--------------------------------------------------------------------------|
| 72            | 53         | P00450            | R.MFTTAPDQVDKE.D                  | Y      | 62,41  | 1380,623  | 12     | 2,8       | 691,3207 | 2 | 30,6 |               |               |               | 2,97E+06              |                       |                       |                      |                        |                        | 19       | F19:2600 | 599   | 610 |                                    |                                                                          |
| 72            | 53         | P00450            | E.VGDTIR.V                        | N      | 29,37  | 659,3602  | 6      | 3,7       | 660,3699 | 1 | 4,8  |               |               |               | 3,26E+05              |                       |                       |                      |                        |                        | 19       | F19:2003 | 457   | 462 |                                    |                                                                          |
| 72            | 53         | P00450            | K.GAY(+15.99)P(-27.99)LSIEPIGVR.F | Y      | 25,79  | 1358,7557 | 13     | 12        | 680,3932 | 2 | 2,9  |               |               |               | 3,28E+06              |                       |                       |                      |                        |                        | 19       | F19:2829 | 469   | 481 |                                    | Y3:Oxidation or Hydroxylation:95.35; P4:Pyrrrolidone from Proline:105.53 |
| 56            | 20         | P00734            | L.QVNVNPIVERPVC(+47.98)K.D        | Y      | 73,55  | 1640,892  | 14     | 8,1       | 821,4599 | 2 | 2,3  |               |               |               | 2,02E+06              |                       |                       |                      |                        |                        | 20       | F20:2682 | 524   | 537 | Cysteine oxidation to cysteic acid | C13:Cysteine oxidation to cysteic acid:1000.00                           |
| 56            | 20         | P00734            | K.YGFYTHVFR.L                     | Y      | 71,19  | 1188,5715 | 9      | 3,8       | 595,2953 | 2 | 3,3  |               |               |               | 1,44E+06              |                       |                       |                      |                        |                        | 19       | F19:2877 | 600   | 608 |                                    |                                                                          |
| 56            | 20         | P00734            | K.IYIHPR.Y                        | Y      | 55,57  | 797,4548  | 6      | 1,6       | 399,7353 | 2 | 7,6  |               |               |               | 2,36E+07              |                       |                       |                      |                        |                        | 19       | F19:2288 | 447   | 452 |                                    |                                                                          |
| 56            | 20         | P00734            | R.TFGSGEADC(+31.99)GLRPLFEK.K     | Y      | 53,34  | 1857,8567 | 17     | 8,7       | 929,9437 | 2 | 3,5  |               |               |               | 2,77E+06              |                       |                       |                      |                        |                        | 20       | F20:2777 | 328   | 344 |                                    | C9:Dihydroxy:21.15                                                       |
| 56            | 20         | P00734            | E.GDSGGPFVMK.S                    | Y      | 51,39  | 993,4589  | 10     | 2,2       | 497,7379 | 2 | 1,1  |               |               |               | 4,09E+06              |                       |                       |                      |                        |                        | 19       | F19:2656 | 566   | 575 |                                    |                                                                          |

|    |    |            |                       |   |           |                   |    |         |                   |   |              |              |              |                  |                  |              |                  |                                     |                              |              |   |             |     |     |  |  |
|----|----|------------|-----------------------|---|-----------|-------------------|----|---------|-------------------|---|--------------|--------------|--------------|------------------|------------------|--------------|------------------|-------------------------------------|------------------------------|--------------|---|-------------|-----|-----|--|--|
| 56 | 20 | P007<br>34 | E.KIYIHP.R.Y          | Y | 47,<br>56 | 925,<br>5497      | 7  | 2,<br>5 | 463,<br>7833      | 2 | 2<br>7<br>2  | 2,42E+<br>06 | 19           | F19:<br>225<br>2 | 446              | 452          |                  |                                     |                              |              |   |             |     |     |  |  |
| 56 | 20 | P007<br>34 | R.VTGWGN.L            | Y | 33,<br>72 | 632,<br>2918      | 6  | 2,<br>6 | 633,<br>3007      | 1 | 2<br>9       | 2,51E+<br>06 | 19           | F19:<br>242<br>8 | 501              | 506          |                  |                                     |                              |              |   |             |     |     |  |  |
| 56 | 20 | P007<br>34 | K.IYIHP.R             | Y | 28,<br>76 | 641,<br>3537      | 5  | 5,<br>1 | 321,<br>6858      | 2 | 2<br>7<br>6  | 1,20E+<br>06 | 20           | F20:<br>225<br>7 | 447              | 451          |                  |                                     |                              |              |   |             |     |     |  |  |
| 56 | 20 | P007<br>34 | R.YPHKPE.I            | Y | 28,<br>12 | 769,<br>3759      | 6  | 1,<br>7 | 385,<br>6959      | 2 | 2<br>4<br>4  | 0            | 19           | F19:<br>196<br>3 | 136              | 141          |                  |                                     |                              |              |   |             |     |     |  |  |
| 56 | 20 | P007<br>34 | L.LVRIGKHSR.T         | Y | 26,<br>56 | 1064,<br>656<br>6 | 9  | 5,<br>4 | 355,<br>8947      | 3 | 2,<br>6<br>6 | 3,02E+<br>06 | 21           | F21:<br>179<br>1 | 423              | 431          |                  |                                     |                              |              |   |             |     |     |  |  |
| 56 | 20 | P007<br>34 | L.VRIGKHSR.T          | Y | 25,<br>49 | 951,<br>5726      | 8  | 4,<br>9 | 318,<br>1997      | 3 | 7,<br>5<br>1 | 2,90E+<br>05 | 21           | F21:<br>138<br>6 | 424              | 431          |                  |                                     |                              |              |   |             |     |     |  |  |
| 94 | 46 | P007<br>40 | R.YVNWIK.E            | Y | 39,<br>58 | 821,<br>4435      | 6  | 4,<br>4 | 411,<br>7309      | 2 | 2<br>9<br>4  | 9,72E+<br>05 | 21           | F21:<br>242<br>7 | 450              | 455          |                  |                                     |                              |              |   |             |     |     |  |  |
| 94 | 46 | P007<br>40 | E.YTNIFLK.F           | Y | 35,<br>19 | 897,<br>496       | 7  | 2,<br>9 | 449,<br>7566      | 2 | 3<br>3<br>5  | 1,92E+<br>06 | 19           | F19:<br>289<br>6 | 341              | 347          |                  |                                     |                              |              |   |             |     |     |  |  |
| 94 | 46 | P007<br>40 | R.VPLVDR.A            | Y | 32,<br>81 | 697,<br>4122      | 6  | 2,<br>1 | 698,<br>421       | 1 | 2<br>9<br>1  | 5,06E+<br>06 | 19           | F19:<br>244<br>2 | 374              | 379          |                  |                                     |                              |              |   |             |     |     |  |  |
| 70 | 38 | P007<br>42 | K.TGIVSGFGR.T         | Y | 52,<br>66 | 892,<br>4766      | 9  | 6,<br>9 | 447,<br>2487      | 2 | 2<br>8<br>8  | 9,40E+<br>06 | 20           | F20:<br>236<br>5 | 358              | 366          |                  |                                     |                              |              |   |             |     |     |  |  |
| 70 | 38 | P007<br>42 | K.ETYDFDIAVLR.L       | Y | 45,<br>59 | 1340,<br>661<br>1 | 11 | 6,<br>3 | 671,<br>342       | 2 | 4,<br>5<br>3 | 3,23E+<br>06 | 20           | F20:<br>285<br>9 | 317              | 327          |                  |                                     |                              |              |   |             |     |     |  |  |
| 70 | 38 | P007<br>42 | K.MLEVPYVDR.N         | Y | 44,<br>88 | 1120,<br>558<br>6 | 9  | 3       | 561,<br>2883      | 2 | 3,<br>3<br>9 | 3,50E+<br>06 | 19           | F19:<br>293<br>6 | 379              | 387          |                  |                                     |                              |              |   |             |     |     |  |  |
| 70 | 38 | P007<br>42 | K.M(+15.99)LEVPYVDR.N | Y | 41,<br>1  | 1136,<br>553<br>6 | 9  | 5,<br>9 | 569,<br>2874      | 2 | 3<br>0,<br>5 | 6,98E+<br>06 | 20           | F20:<br>252<br>4 | 379              | 387          | Oxidation<br>(M) | M1:Oxidat<br>ion<br>(M):1000.0<br>0 |                              |              |   |             |     |     |  |  |
| 51 | 19 | P007<br>47 | R.HSIFTPETNPR.A       | Y | 68,<br>06 | 1297,<br>641<br>5 | 11 | 0       | 649,<br>828       | 2 | 2<br>8,<br>2 | 8,08E+05     | 1,81E+06     | 3,59E+<br>06     | 1,71E+0<br>6     | 3,34E+0<br>5 | 1,35E+0<br>6     | 1,81E+0<br>6                        | 5,37E+0<br>5                 | 2,83E+<br>06 | 6 | F6:2<br>463 | 513 | 523 |  |  |
| 51 | 19 | P007<br>47 | R.AFQYHSK.E           | Y | 48,<br>89 | 879,<br>4239      | 7  | 1,<br>8 | 440,<br>72        | 2 | 2<br>6,<br>6 | 0            | 1            | F1:2<br>136      | 63               | 69           |                  |                                     |                              |              |   |             |     |     |  |  |
| 51 | 19 | P007<br>47 | R.FVTWIEGVMR.N        | Y | 46,<br>77 | 1236,<br>632<br>4 | 10 | 3,<br>9 | 619,<br>3211      | 2 | 3<br>6,<br>1 | 0            | 4            | F4:3<br>183      | 799              | 808          |                  |                                     |                              |              |   |             |     |     |  |  |
| 51 | 19 | P007<br>47 | K.EAQLPIENK.V         | Y | 35,<br>25 | 1139,<br>618<br>7 | 10 | 7,<br>6 | 570,<br>8209      | 2 | 2<br>9,<br>7 | 7,64E+05     | 1,77E+06     | 11               | F11:<br>240<br>9 | 718          | 727              |                                     |                              |              |   |             |     |     |  |  |
| 51 | 19 | P007<br>47 | K.LSSPAVITDK.V        | Y | 35,<br>21 | 1029,<br>570<br>6 | 10 | 4,<br>2 | 1030,<br>573<br>5 | 1 | 2<br>9       | 0            | 5            | F5:2<br>541      | 671              | 680          |                  |                                     |                              |              |   |             |     |     |  |  |
| 51 | 19 | P007<br>47 | R.LFLEPTR.K           | Y | 29,<br>59 | 874,<br>4912      | 7  | 5,<br>4 | 438,<br>2552      | 2 | 3<br>0,<br>6 | 1,30E+06     | 3            | F3:2<br>498      | 657              | 663          |                  |                                     |                              |              |   |             |     |     |  |  |
| 51 | 19 | P007<br>47 | K.DIALLK.L            | Y | 29,<br>56 | 671,<br>4218      | 6  | 5,<br>7 | 672,<br>4329      | 1 | 3<br>0,<br>3 | 4,30E+05     | 1,21E+<br>07 | 20               | F20:<br>250<br>0 | 665          | 670              |                                     |                              |              |   |             |     |     |  |  |
| 93 | 76 | PD10<br>09 | K.TDTSHHDDQHPFTFNK.I  | Y | 44,<br>13 | 1778,<br>760<br>9 | 15 | 8,<br>6 | 890,<br>3801      | 2 | 2<br>5,<br>9 | 1,13E+06     | 10           | F10:<br>207<br>4 | 35               | 49           |                  |                                     |                              |              |   |             |     |     |  |  |
| 76 | 49 | PD10<br>23 | K.SLNEEAVKK.D         | Y | 45,<br>04 | 1016,<br>550<br>2 | 9  | 0,<br>6 | 509,<br>2827      | 2 | 1<br>9,<br>3 | 9,16E+04     | 4            | F4:1<br>599      | 1169             | 117<br>7     |                  |                                     |                              |              |   |             |     |     |  |  |
| 76 | 49 | PD10<br>23 | K.TAQEGDGHSHVYTK.A    | Y | 34,<br>73 | 1528,<br>690<br>7 | 14 | 1,<br>4 | 510,<br>5701      | 3 | 3,<br>5<br>1 | 0            | 6            | F6:1<br>054      | 1134             | 114<br>7     |                  |                                     |                              |              |   |             |     |     |  |  |
| 76 | 49 | PD10<br>23 | K.EY(+15.01)EMK.L     | Y | 27,<br>58 | 713,<br>3054      | 5  | 0,<br>6 | 357,<br>6602      | 2 | 6,<br>3<br>1 | 0            | 0            | 5                | F5:1<br>316      | 315          | 319              | Tyrosine<br>oxidation<br>to 2-      | Y2:Tyrosin<br>e<br>oxidation |              |   |             |     |     |  |  |

|    |    |        |                                |   |       |           |    |     |           |   |     |          |          | aminotyro sine | to 2-aminotyro sine:1000.00 |          |      |      |
|----|----|--------|--------------------------------|---|-------|-----------|----|-----|-----------|---|-----|----------|----------|----------------|-----------------------------|----------|------|------|
| 30 | 39 | P01024 | R.EPGQDLVVLPLSITTDIPSPFR.L     | Y | 72,49 | 2443,2998 | 22 | 8,3 | 1222,6674 | 2 | 4,7 | 0        | 0        | 5,45E+05       | 48                          | F48:2856 | 509  | 530  |
| 30 | 39 | P01024 | K.AGDFLEANYMNLQR.S             | Y | 63,97 | 1640,7617 | 14 | 0,2 | 821,3879  | 2 | 4,3 | 0        | 0        | 0              | 6                           | F6:3025  | 1172 | 1185 |
| 30 | 39 | P01024 | K.GPLLNK.F                     | Y | 49,93 | 640,3908  | 6  | 1,5 | 321,2022  | 2 | 1,9 | 0        | 0        | 6              | F6:1846                     | 1204     | 1209 |      |
| 30 | 39 | P01024 | R.WEDPGK.Q                     | Y | 46,91 | 730,3286  | 6  | -1  | 366,1712  | 2 | 2,2 | 3,36E+05 | 2,28E+05 | 1,49E+05       | 13                          | F13:1805 | 1220 | 1225 |
| 30 | 39 | P01024 | R.WLNEQR.Y                     | Y | 32,48 | 844,4191  | 6  | 1,1 | 845,4273  | 1 | 6,7 | 0        | 0        | 5              | F5:2313                     | 1255     | 1260 |      |
| 50 | 13 | P01031 | K.LQGTLPVEAR.E                 | Y | 60,16 | 1082,6084 | 10 | 1,7 | 542,3105  | 2 | 9,5 | 7,17E+05 | 7,88E+05 | 1,88E+06       | 5                           | F5:2587  | 1129 | 1138 |
| 50 | 13 | P01031 | K.GLLVGEILSAVLSQEGINILHLPK.G   | Y | 56,72 | 2613,5105 | 25 | 0,6 | 872,1769  | 3 | 5,4 | 5,49E+06 | 2,58E+06 | 5              | F5:3973                     | 981      | 1005 |      |
| 50 | 13 | P01031 | R.YGGGFYSTQDTINAIEGLTEYSLLVK.Q | Y | 56,22 | 2838,3962 | 26 | 4,4 | 947,1436  | 3 | 1,6 | 0        | 0        | 5              | F5:3668                     | 1280     | 1305 |      |
| 50 | 13 | P01031 | K.KIEEIAAK.Y                   | Y | 53,11 | 900,528   | 8  | 2,1 | 451,2703  | 2 | 0,4 | 5,08E+05 | 8,09E+05 | 1,08E+06       | 6                           | F6:1704  | 682  | 689  |
| 50 | 13 | P01031 | R.VLQQVVK.Y                    | Y | 42,51 | 756,4493  | 7  | 4,1 | 757,4536  | 1 | 9,4 | 2,72E+05 | 0        | 0              | 14                          | F14:1571 | 1085 | 1091 |
| 50 | 13 | P01031 | K.ENSQYQPIK.L                  | Y | 42,29 | 1105,5404 | 9  | 0,1 | 553,7774  | 2 | 2,6 | 0        | 0        | 22             | F22:2177                    | 1120     | 1128 |      |
| 50 | 13 | P01031 | F.HSDPLUEK.Q                   | Y | 42,07 | 937,4869  | 8  | 0   | 469,7507  | 2 | 0,3 | 0        | 0        | 24             | F24:1650                    | 1035     | 1042 |      |
| 50 | 13 | P01031 | R.IPLDLVPK.T                   | Y | 39,89 | 893,5586  | 8  | 2,6 | 447,7878  | 2 | 5,2 | 7,50E+05 | 1,02E+06 | 1              | F1:2950                     | 963      | 970  |      |
| 50 | 13 | P01031 | R.ESYSGVTLDPR.G                | Y | 38,38 | 1222,583  | 11 | 7,6 | 612,3034  | 2 | 9,7 | 0        | 0        | 12             | F12:2405                    | 937      | 947  |      |
| 50 | 13 | P01031 | K.THPQFR.S                     | Y | 37,73 | 784,398   | 6  | 4,6 | 393,2081  | 2 | 2,4 | 0        | 0        | 11             | F11:1782                    | 1201     | 1206 |      |
| 50 | 13 | P01031 | K.DINYVNPVIK.W                 | Y | 35,51 | 1173,6394 | 10 | 4,8 | 587,8298  | 2 | 1,5 | 0        | 0        | 11             | F11:2558                    | 1263     | 1272 |      |
| 35 | 17 | P01042 | K.TVGSDFYSFK.Y                 | Y | 66,9  | 1250,5819 | 11 | 3,1 | 626,3002  | 2 | 3,9 | 1,74E+06 | 1,81E+06 | 1              | F1:2827                     | 65       | 75   |      |
| 35 | 17 | P01042 | K.YFIDFVAR.E                   | Y | 66,16 | 1029,5283 | 8  | 3,4 | 515,7732  | 2 | 6,9 | 1,65E+06 | 1,66E+06 | 1              | F1:3103                     | 317      | 324  |      |
| 35 | 17 | P01042 | R.DIPTNSPELEETLTHITKL          | Y | 65,98 | 2138,0742 | 19 | 2,1 | 1070,0421 | 2 | 4,5 | 0        | 0        | 5              | F5:3043                     | 270      | 288  |      |
| 35 | 17 | P01042 | K.AVDAALKK.Y                   | Y | 51,87 | 814,4912  | 8  | 0,4 | 408,2527  | 2 | 5,2 | 0        | 0        | 23             | F23:1188                    | 36       | 43   |      |
| 35 | 17 | P01042 | K.YNSQNSQNSNQFVLYR.J           | Y | 46,82 | 1873,8707 | 15 | 6,6 | 937,9489  | 2 | 1,1 | 0        | 0        | 4              | F4:2728                     | 44       | 58   |      |
| 35 | 17 | P01042 | R.VQVAVAGK.K                   | Y | 45,86 | 699,4279  | 7  | 1,8 | 700,434   | 1 | 1,7 | 2,37E+06 | 1,56E+06 | 8,00E+05       | 22                          | F22:1333 | 309  | 315  |
| 35 | 17 | P01042 | E.TLTHITKL                     | Y | 44,94 | 913,5233  | 8  | 2,3 | 457,77    | 2 | 6,4 | 8,24E+05 | 0        | 0              | 19                          | F19:2163 | 281  | 288  |

|    |    |            |                                                    |   |           |                   |    |              |                   |   |              |          |              |              |              |                  |                  |              |                 |                                                                                             |                  |     |     |                                                                                                                                              |  |
|----|----|------------|----------------------------------------------------|---|-----------|-------------------|----|--------------|-------------------|---|--------------|----------|--------------|--------------|--------------|------------------|------------------|--------------|-----------------|---------------------------------------------------------------------------------------------|------------------|-----|-----|----------------------------------------------------------------------------------------------------------------------------------------------|--|
| 35 | 17 | P010<br>42 | K.AVDAALK.K                                        | Y | 43,<br>55 | 686,<br>3962      | 7  | 0,<br>2      | 344,<br>2053      | 2 | 2<br>1,<br>3 | 0        | 8,88E+04     |              |              | 14               | F14:<br>174<br>3 | 36           | 42              |                                                                                             |                  |     |     |                                                                                                                                              |  |
| 35 | 17 | P010<br>42 | K.RPPGFSPF.R                                       | Y | 42,<br>92 | 903,<br>4602      | 8  | 5,<br>2      | 452,<br>7397      | 2 | 3<br>1,<br>1 |          | 3,49E+<br>06 |              |              | 20               | F20:<br>256<br>8 | 381          | 388             |                                                                                             |                  |     |     |                                                                                                                                              |  |
| 35 | 17 | P010<br>42 | D.C(+27.99)IGCVHP(-<br>30.01)ISTQSPDLEPLR.H        | Y | 36,<br>81 | 2175<br>,081<br>5 | 20 | 3,<br>2      | 726,<br>0368      | 3 | 3<br>6,<br>1 | 1,02E+06 |              |              | 1            | F1:3<br>032      | 142              | 161          | Formylati<br>on | C1:Formyl<br>ation:1000<br>.00;P7:Prol<br>ine<br>oxidation<br>to<br>pyrrolidino<br>ne:45.97 |                  |     |     |                                                                                                                                              |  |
| 35 | 17 | P010<br>42 | L.PTNSPELEETLHTITK.L                               | Y | 33,<br>17 | 1909<br>,963<br>3 | 17 | 7,<br>6      | 637,<br>6665      | 3 | 3<br>7       |          |              |              | 4,09E+<br>05 | F76:<br>227<br>0 | 76               | 272          | 288             |                                                                                             |                  |     |     |                                                                                                                                              |  |
| 35 | 17 | P010<br>42 | D.CLCGVHPIS(-2.02)TQSPDLEPLR.H                     | Y | 31,<br>23 | 2175<br>,081<br>5 | 20 | 1,<br>6      | 726,<br>0356      | 3 | 3<br>5,<br>8 | 1,13E+06 |              |              | 10           | F10:<br>299<br>1 | 142              | 161          |                 | S9:2-<br>amino-3-<br>oxo-<br>butanoic<br>acid:12.28                                         |                  |     |     |                                                                                                                                              |  |
| 67 | 41 | P018<br>34 | K.VDNALQSGNSQESVTEQDSK.D                           | Y | 12<br>0   | 2134<br>,961<br>4 | 20 | 9,<br>2      | 1068<br>,497<br>8 | 2 | 3<br>0       | 0        | 0            | 1,41E+<br>05 | 5,66E+0<br>6 | 5,88E+0<br>6     | 4,49E+0<br>6     | 3,64E+0<br>6 | 5,04E+0<br>6    | 5,76E+<br>06                                                                                | F38:<br>168<br>9 | 43  | 62  |                                                                                                                                              |  |
| 67 | 41 | P018<br>34 | R.TVAAPSVFIFPPSDEQLKLS                             | Y | 39,<br>86 | 1945<br>,019<br>7 | 18 | 8            | 973,<br>5248      | 2 | 3<br>8,<br>9 |          |              |              | 4,45E+<br>05 | F79:<br>241<br>4 | 79               | 2            | 19              |                                                                                             |                  |     |     |                                                                                                                                              |  |
| 67 | 41 | P018<br>34 | E.VTHQGLSSPVTK.S                                   | Y | 27,<br>06 | 1252<br>,677<br>5 | 12 | 4,<br>3      | 627,<br>3487      | 2 | 2<br>8,<br>2 | 2,58E+05 | 1,25E+06     |              |              | 1                | F1:2<br>280      | 89           | 100             |                                                                                             |                  |     |     |                                                                                                                                              |  |
| 32 | 18 | P018<br>57 | R.VVSVLTVLHQDWLNGKE                                | N | 10<br>6,6 | 1806<br>,999<br>1 | 16 | 6,<br>5      | 904,<br>5128      | 2 | 3<br>9,<br>3 | 2,04E+06 | 2,31E+06     | 1,40E+<br>05 | 5,60E+0<br>6 | 7,04E+0<br>6     | 7,97E+0<br>6     | 7,88E+0<br>6 | 7,56E+0<br>6    | 1,17E+<br>07                                                                                | F59:<br>245<br>4 | 185 | 200 |                                                                                                                                              |  |
| 32 | 18 | P018<br>57 | K.FNWYVDGVEVHNAK.T                                 | N | 88,<br>38 | 1676<br>,794<br>7 | 14 | 8            | 839,<br>4113      | 2 | 3<br>5,<br>2 |          |              |              | 3,91E+0<br>6 | 2,95E+0<br>6     | 2,70E+0<br>6     | 6,51E+0<br>6 | 3,22E+0<br>6    | 6,56E+<br>06                                                                                | F74:<br>211<br>4 | 158 | 171 |                                                                                                                                              |  |
| 32 | 18 | P018<br>57 | K.TTPPVLDSDGSFFLYSK.L                              | Y | 70,<br>15 | 1872<br>,914<br>6 | 17 | 6,<br>9      | 937,<br>471       | 2 | 3<br>8,<br>5 |          |              |              |              | 4,44E+0<br>5     |                  |              | 8,35E+<br>05    | F74:<br>238<br>7                                                                            | 74               | 276 | 292 |                                                                                                                                              |  |
| 32 | 18 | P018<br>57 | V.SVLTVLHQDWLNGK.E                                 | N | 64,<br>33 | 1608<br>,862<br>4 | 14 | 6,<br>4      | 805,<br>4437      | 2 | 3<br>9,<br>7 |          |              |              | 6,01E+0<br>5 |                  | 1,62E+0<br>5     |              | 1,69E+<br>06    | F76:<br>249<br>6                                                                            | 76               | 187 | 200 |                                                                                                                                              |  |
| 32 | 18 | P018<br>57 | K.GFYPSDIAEWESNGQPENNYK.T                          | N | 48,<br>76 | 2543<br>,124      | 22 | 11           | 1272<br>,583<br>7 | 2 | 3<br>7,<br>9 |          |              |              |              | 7,44E+0<br>5     |                  |              | 4,50E+<br>05    | F48:<br>233<br>1                                                                            | 48               | 254 | 275 |                                                                                                                                              |  |
| 32 | 18 | P018<br>57 | E.ALHNHYTK.S                                       | N | 48,<br>75 | 1110<br>,557      | 9  | 3,<br>6      | 556,<br>2878      | 2 | 2<br>4,<br>5 | 3,80E+05 | 3,09E+05     | 2,51E+<br>05 |              |                  |                  |              |                 | 1,68E+<br>06                                                                                | F1:1<br>951      | 1   | 314 | 322                                                                                                                                          |  |
| 32 | 18 | P018<br>57 | I.SRTP(-<br>27.99)EVTC(+31.99)VVVVDVSHEDPEVK<br>.F | Y | 31,<br>77 | 2328<br>,126<br>7 | 21 | -<br>2,<br>1 | 777,<br>0479      | 3 | 3<br>3,<br>6 |          |              |              | 1,57E+0<br>6 | 6,88E+0<br>5     |                  |              | 1,68E+<br>06    | F60:<br>196<br>1                                                                            | 60               | 137 | 157 | P4:Pyrrolid<br>one from<br>Proline:95.<br>14;C8:Dihy<br>droxy:0.00                                                                           |  |
| 32 | 18 | P018<br>57 | S.R(+43.01)TPEVTC(+47.98)VVVVDVSH<br>EDPEVK.F      | Y | 30,<br>35 | 2328<br>,090<br>3 | 20 | 11           | 777,<br>0456      | 3 | 3<br>3,<br>7 |          |              |              | 1,57E+0<br>6 | 1,10E+0<br>6     | 4,63E+0<br>6     |              | 1,97E+<br>06    | F54:<br>198<br>7                                                                            | 54               | 138 | 157 | Cysteine<br>oxidation<br>to cysteic<br>acid<br>R1:Carbam<br>ylation:68.<br>89;C7:Cyst<br>eine<br>oxidation<br>to cysteic<br>acid:1000.<br>00 |  |
| 32 | 18 | P018<br>57 | K.ALPAPIEK.T                                       | N | 28        | 837,<br>496       | 8  | 2,<br>6      | 419,<br>7563      | 2 | 3<br>0,<br>4 | 1,23E+06 |              |              |              |                  |                  |              |                 | F10:<br>249<br>3                                                                            | 10               | 210 | 217 |                                                                                                                                              |  |
| 32 | 18 | P018<br>57 | I.SR(+31.99)TP(-<br>27.99)EVTCVVVDVSHEDPEVK.F      | Y | 27,<br>63 | 2328<br>,126<br>7 | 21 | -<br>1,<br>1 | 777,<br>0486      | 3 | 3<br>3,<br>5 |          |              |              | 1,33E+0<br>6 |                  |                  |              |                 | F34:<br>197<br>9                                                                            | 34               | 137 | 157 | R2:Dihydr<br>oxy:0.00;P<br>4:Pyrrolid<br>one from<br>Proline:92.<br>72                                                                       |  |
| 36 | 45 | P018<br>60 | R.VVSVLTVLHQDWLNGKE                                | N | 10<br>6,6 | 1806<br>,999<br>1 | 16 | 6,<br>5      | 904,<br>5128      | 2 | 3<br>9,<br>3 | 2,04E+06 | 2,31E+06     | 1,40E+<br>05 | 5,60E+0<br>6 | 7,04E+0<br>6     | 7,97E+0<br>6     | 7,88E+0<br>6 | 7,56E+0<br>6    | 1,17E+<br>07                                                                                | F59:<br>245<br>4 | 59  | 232 | 247                                                                                                                                          |  |

|    |    |            |                           |   |           |                   |    |         |                   |   |             |          |              |              |              |              |              |                  |              |                  |                  |                  |           |            |
|----|----|------------|---------------------------|---|-----------|-------------------|----|---------|-------------------|---|-------------|----------|--------------|--------------|--------------|--------------|--------------|------------------|--------------|------------------|------------------|------------------|-----------|------------|
| 36 | 45 | P018<br>60 | V.SVLTVLHQDWLNGK.E        | N | 64,<br>33 | 1608<br>,862<br>4 | 14 | 6,<br>4 | 805,<br>4437      | 2 | 3<br>9<br>7 |          | 6,01E+0<br>5 |              | 1,62E+0<br>5 | 1,69E+<br>06 | 76           | F76:<br>249<br>6 | 234          | 247              |                  |                  |           |            |
| 36 | 45 | P018<br>60 | K.ALPAPIEK.T              | N | 28        | 837,<br>496       | 8  | 2,<br>6 | 419,<br>7563      | 2 | 3<br>0<br>4 | 1,23E+06 |              |              |              |              | 10           | F10:<br>249<br>3 | 257          | 264              |                  |                  |           |            |
| 29 | 28 | P018<br>61 | R.VVSVLTVLHQDWLNGK.E      | N | 10<br>6,6 | 1806<br>,999<br>1 | 16 | 6,<br>5 | 904,<br>5128      | 2 | 9<br>3<br>3 | 2,04E+06 | 2,31E+06     | 1,40E+<br>05 | 5,60E+0<br>6 | 7,04E+0<br>6 | 7,97E+0<br>6 | 7,88E+0<br>6     | 7,56E+0<br>6 | 1,17E+<br>07     | 59               | F59:<br>245<br>4 | 182       | 197        |
| 29 | 28 | P018<br>61 | Q.FNWWYVDGVEVHNAK.T       | N | 88,<br>38 | 1676<br>,794<br>7 | 14 | 8       | 839,<br>4113      | 2 | 5<br>2      |          |              |              | 3,91E+0<br>6 | 2,95E+0<br>6 | 2,70E+0<br>6 | 6,51E+0<br>6     | 3,22E+0<br>6 | 6,56E+<br>06     | 74               | F74:<br>211<br>4 | 155       | 168        |
| 29 | 28 | P018<br>61 | V.SVLTVLHQDWLNGK.E        | N | 64,<br>33 | 1608<br>,862<br>4 | 14 | 6,<br>4 | 805,<br>4437      | 2 | 9<br>7      |          |              |              | 6,01E+0<br>5 |              | 1,62E+0<br>5 | 1,69E+<br>06     | 76           | F76:<br>249<br>6 | 184              | 197              |           |            |
| 29 | 28 | P018<br>61 | K.GFYPSDIAEVESNGQPENNYK.T | N | 48,<br>76 | 2543<br>,124      | 22 | 11      | 1272<br>,583<br>7 | 2 | 7<br>9      |          |              |              |              |              | 7,44E+0<br>5 |                  | 4,50E+<br>05 | 48               | F48:<br>233<br>1 | 251              | 272       |            |
| 29 | 28 | P018<br>61 | E.ALHNHYTK.S              | N | 48,<br>75 | 1110<br>,557      | 9  | 3,<br>6 | 556,<br>2878      | 2 | 4<br>5      | 3,80E+05 | 3,09E+05     | 2,51E+<br>05 |              |              |              |                  |              | 1                | F1:1<br>951      | 311              | 319       |            |
| 49 | 29 | P018<br>71 | K.QVGSVTTDQVQAEAKE        | Y | 73,<br>99 | 1616<br>,800<br>5 | 16 | 0,<br>6 | 809,<br>407       | 2 | 7<br>8      | 0        | 0            | 0            |              |              |              |                  |              | 15               | F15:<br>239<br>1 | 154              | 169       |            |
| 49 | 29 | P018<br>71 | K.ESGPTTYK.V              | Y | 45,<br>81 | 881,<br>413       | 8  | 0,<br>5 | 441,<br>7136      | 2 | 5<br>9      | 0        |              |              |              |              |              |                  |              | 5                | F5:1<br>275      | 170              | 177       |            |
| 49 | 29 | P018<br>71 | R.QIQVSWLR.E              | Y | 40,<br>3  | 1028<br>,576<br>7 | 8  | 2,<br>7 | 515,<br>297       | 2 | 3<br>5      |          | 5,87E+05     |              |              |              |              |                  |              | 10               | F10:<br>292<br>7 | 143              | 150       |            |
| 49 | 29 | P018<br>71 | R.VFAIPPSFASIFLTK.S       | Y | 39,<br>06 | 1636<br>,922<br>9 | 15 | 3,<br>6 | 819,<br>4717      | 2 | 2,<br>3     |          | 2,23E+05     |              |              |              |              |                  |              | 10               | F10:<br>352<br>7 | 224              | 238       |            |
| 21 | 9  | P018<br>76 | R.QEPSQGTTFVAVTSILR.V     | Y | 93,<br>05 | 1834<br>,942<br>5 | 17 | 7,<br>1 | 918,<br>485       | 2 | 7<br>1      | 1,30E+07 | 1,07E+07     | 9,29E+<br>06 | 5,68E+0<br>7 | 4,97E+0<br>7 | 3,49E+0<br>7 | 6,10E+0<br>7     | 4,09E+0<br>7 | 4,57E+<br>07     | 34               | F34:<br>229<br>2 | 283       | 299        |
| 21 | 9  | P018<br>76 | R.WLQGSQELPR.E            | N | 73,<br>95 | 1212<br>,625<br>1 | 10 | 1,<br>2 | 607,<br>3206      | 2 | 0<br>5      | 5,12E+06 | 6,81E+06     | 1,46E+<br>07 |              |              |              |                  |              | 13               | F13:<br>261<br>0 | 264              | 273       |            |
| 21 | 9  | P018<br>76 | K.SAVQGPPEP.D             | N | 70,<br>39 | 939,<br>4774      | 9  | 1,<br>4 | 470,<br>7453      | 2 | 1<br>1      | 9,04E+05 | 1,55E+06     | 4,81E+<br>05 |              |              |              |                  |              | 6                | F6:1<br>768      | 169              | 177       |            |
| 21 | 9  | P018<br>76 | E.ALPLAFTQK.T             | N | 68,<br>38 | 987,<br>5753      | 9  | 2,<br>6 | 494,<br>7962      | 2 | 4<br>4      | 3,88E+06 | 4,73E+06     |              |              |              |              |                  |              | 1                | F1:2<br>871      | 319              | 327       |            |
| 21 | 9  | P018<br>76 | R.DASGVFTFWTPSSGK.S       | Y | 67,<br>94 | 1539<br>,720<br>5 | 15 | 3,<br>2 | 770,<br>87        | 2 | 4<br>6      | 0        | 1,25E+06     |              | 2,42E+0<br>6 | 1,15E+0<br>6 | 0            | 4,48E+0<br>6     | 4,60E+0<br>6 | 5,36E+<br>06     | 10               | F10:<br>288<br>5 | 154       | 168        |
| 21 | 9  | P018<br>76 | R.VAAEDWK.K               | N | 64,<br>38 | 817,<br>397       | 7  | 0,<br>6 | 409,<br>7055      | 2 | 6<br>3      | 4,38E+06 | 2,41E+06     | 2,94E+<br>06 |              |              |              |                  |              | 15               | F15:<br>224<br>7 | 300              | 306       |            |
| 21 | 9  | P018<br>76 | K.SGNTFRPEVH.L            | N | 63,<br>92 | 1142<br>,546<br>9 | 10 | 6,<br>1 | 572,<br>2842      | 2 | 8<br>8      | 1,37E+05 |              | 0            | 6,86E+0<br>6 | 2,76E+0<br>6 | 2,86E+0<br>6 | 8,50E+0<br>6     | 2,92E+0<br>6 | 6,24E+<br>06     | 29               | F29:<br>159<br>2 | 222       | 231        |
| 21 | 9  | P018<br>76 | R.LSLHRPALE.D             | N | 56,<br>1  | 1034<br>,587<br>3 | 9  | 2,<br>5 | 518,<br>3022      | 2 | 1<br>2      | 1,46E+06 | 1,86E+06     |              |              |              |              |                  |              | 10               | F10:<br>257<br>1 | 127              | 135       |            |
| 21 | 9  | P018<br>76 | K.TPLTATLSK.S             | Y | 55,<br>62 | 930,<br>5386      | 9  | 6,<br>3 | 466,<br>2795      | 2 | 8<br>5      | 2,64E+06 | 4,54E+06     |              |              |              |              | 5,36E+0<br>5     |              | 11               | F11:<br>230<br>5 | 213              | 221       |            |
| 21 | 9  | P018<br>76 | K.YLTWASR.Q               | N | 52,<br>26 | 895,<br>4552      | 7  | 1,<br>6 | 448,<br>7356      | 2 | 2<br>1      | 9,52E+05 | 1,31E+06     |              |              |              |              |                  |              | 10               | F10:<br>266<br>1 | 276              | 282       |            |
| 21 | 9  | P018<br>76 | K.SGNTFRPE.V              | N | 43,<br>26 | 906,<br>4195      | 8  | 3       | 454,<br>2184      | 2 | 7<br>4      | 4,70E+05 | 1,10E+06     |              |              |              |              |                  |              | 1                | F1:2<br>206      | 222              | 229       |            |
| 21 | 9  | P018<br>76 | R.GFSPK.D                 | N | 40,<br>91 | 534,<br>2802      | 5  | 0,<br>4 | 535,<br>2877      | 1 | 4<br>1      | 3,12E+05 | 5,71E+05     | 0            |              |              |              |                  |              | 23               | F23:<br>109<br>0 | 254              | 258       |            |
| 21 | 9  | P018<br>76 | K.DVLRW                   | N | 36,<br>38 | 600,<br>3595      | 5  | 0,<br>2 | 601,<br>3666      | 1 | 5<br>2      | 9,15E+05 | 3,54E+06     | 0            |              |              |              |                  |              | 23               | F23:<br>212<br>6 | 259              | 263       |            |
| 21 | 9  | P018       | K.TFTC(+15.99)TAAVPESK(-  | Y | 25,       | 1744              | 16 | 1,      | 873,              | 2 | 3           |          | 3,09E+07     |              |              |              |              |                  | 10           | F10:             | 201              | 216              | Oxidation | C4:Oxidati |

|    |    |             |                                            |           |           |                   |         |              |                   |   |              |          |          |              |              |              |              |              |                  |                                                                                                  |                                                                                                                                    |                                                                                                                                                                  |     |     |  |
|----|----|-------------|--------------------------------------------|-----------|-----------|-------------------|---------|--------------|-------------------|---|--------------|----------|----------|--------------|--------------|--------------|--------------|--------------|------------------|--------------------------------------------------------------------------------------------------|------------------------------------------------------------------------------------------------------------------------------------|------------------------------------------------------------------------------------------------------------------------------------------------------------------|-----|-----|--|
| 76 |    | 1.03)TPLT.A | 29                                         | ,786<br>5 | 8         | 4021              | 7,<br>4 |              |                   |   |              |          |          |              |              |              |              | 313<br>4     |                  | or<br>Hydroxyla<br>tion (C);<br>Lysine<br>oxidation<br>to<br>aminoadip<br>ic<br>semialdeh<br>yde | on or<br>Hydroxylat<br>ion<br>(C):1000.0<br>0;K12:Lysi<br>ne<br>oxidation<br>to<br>aminoadip<br>ic<br>semialdeh<br>yde:1000.0<br>0 |                                                                                                                                                                  |     |     |  |
| 43 | 16 | P018<br>77  | R.WLQGSQELPR.E                             | N         | 73,<br>95 | 1212<br>,625<br>1 | 10      | 1,<br>2      | 607,<br>3206      | 2 | 3<br>0,<br>5 | 5,12E+06 | 6,81E+06 | 1,46E+<br>07 |              |              |              | 13           | F13:<br>261<br>0 | 251                                                                                              | 260                                                                                                                                |                                                                                                                                                                  |     |     |  |
| 43 | 16 | P018<br>77  | K.SAVQGPPER.D                              | N         | 70,<br>39 | 939,<br>4774      | 9       | -<br>1,<br>4 | 470,<br>7453      | 2 | 2<br>1,<br>1 | 9,04E+05 | 1,55E+06 | 4,81E+<br>05 |              |              |              | 6            | F6:1<br>768      | 156                                                                                              | 164                                                                                                                                |                                                                                                                                                                  |     |     |  |
| 43 | 16 | P018<br>77  | E.ALPLAFTQK.T                              | N         | 68,<br>38 | 987,<br>5753      | 9       | 2,<br>6      | 494,<br>7962      | 2 | 3<br>4,<br>4 | 3,88E+06 | 4,73E+06 |              |              |              |              | 1            | F1:2<br>871      | 306                                                                                              | 314                                                                                                                                |                                                                                                                                                                  |     |     |  |
| 43 | 16 | P018<br>77  | R.VAAEDWK.K                                | N         | 64,<br>38 | 817,<br>397       | 7       | -<br>0,<br>6 | 409,<br>7055      | 2 | 2<br>6,<br>3 | 4,38E+06 | 2,41E+06 | 2,94E+<br>06 |              |              |              | 15           | F15:<br>224<br>7 | 287                                                                                              | 293                                                                                                                                |                                                                                                                                                                  |     |     |  |
| 43 | 16 | P018<br>77  | K.SGNTFRPEVH.L                             | N         | 63,<br>92 | 1142<br>,546<br>9 | 10      | 6,<br>1      | 572,<br>2842      | 2 | 2<br>8,<br>8 | 1,37E+05 |          | 0            | 6,86E+0<br>6 | 2,76E+0<br>6 | 2,86E+0<br>6 | 8,50E+0<br>6 | 2,92E+0<br>6     | 6,24E+<br>06                                                                                     | 29                                                                                                                                 | F29:<br>159<br>2                                                                                                                                                 | 209 | 218 |  |
| 43 | 16 | P018<br>77  | R.LSLHRPALE.D                              | N         | 56,<br>1  | 1034<br>,587<br>3 | 9       | 2,<br>5      | 518,<br>3022      | 2 | 3<br>1,<br>2 | 1,46E+06 | 1,86E+06 |              |              |              |              | 10           | F10:<br>257<br>1 | 114                                                                                              | 122                                                                                                                                |                                                                                                                                                                  |     |     |  |
| 43 | 16 | P018<br>77  | K.YLTWASR.Q                                | N         | 52,<br>26 | 895,<br>4552      | 7       | 1,<br>6      | 448,<br>7356      | 2 | 3<br>2,<br>1 | 9,52E+05 | 1,31E+06 |              |              |              |              | 10           | F10:<br>266<br>1 | 263                                                                                              | 269                                                                                                                                |                                                                                                                                                                  |     |     |  |
| 43 | 16 | P018<br>77  | K.SGNTFRPE.V                               | N         | 43,<br>26 | 906,<br>4195      | 8       | 3            | 454,<br>2184      | 2 | 2<br>7,<br>4 | 4,70E+05 | 1,10E+06 |              |              |              |              | 1            | F1:2<br>206      | 209                                                                                              | 216                                                                                                                                |                                                                                                                                                                  |     |     |  |
| 43 | 16 | P018<br>77  | R.GFSPK.D                                  | N         | 40,<br>91 | 534,<br>2802      | 5       | 0,<br>4      | 535,<br>2877      | 1 | 1<br>4,<br>1 | 3,12E+05 | 5,71E+05 | 0            |              |              |              | 23           | F23:<br>109<br>0 | 241                                                                                              | 245                                                                                                                                |                                                                                                                                                                  |     |     |  |
| 43 | 16 | P018<br>77  | K.DVLR.W                                   | N         | 36,<br>38 | 600,<br>3595      | 5       | -<br>0,<br>2 | 601,<br>3666      | 1 | 2<br>5,<br>2 | 9,15E+05 | 3,54E+06 | 0            |              |              |              | 23           | F23:<br>212<br>6 | 246                                                                                              | 250                                                                                                                                |                                                                                                                                                                  |     |     |  |
| 58 | 33 | P026<br>47  | R.EQLGPVTQEFWDNLEK.E                       | Y         | 87,<br>85 | 1931<br>,926<br>5 | 16      | 8,<br>6      | 966,<br>9788      | 2 | 3<br>9,<br>2 |          |          | 2,89E+<br>07 | 3,54E+0<br>7 |              |              | 3,89E+<br>07 | 54               | F54:<br>244<br>6                                                                                 | 86                                                                                                                                 | 101                                                                                                                                                              |     |     |  |
| 58 | 33 | P026<br>47  | K.LR(+15.99)EQLGP(-<br>30.01)VTQEFWDNLEK.E | Y         | 55,<br>18 | 2187<br>,095<br>9 | 18      | 5,<br>5      | 1094<br>,561<br>3 | 2 | 3<br>8,<br>1 |          |          |              | 2,33E+0<br>5 |              |              | 50           | F50:<br>232<br>3 | 84                                                                                               | 101                                                                                                                                | Proline<br>oxidation<br>to<br>pyrrolidino<br>ne<br>R2:Oxidati<br>on or<br>Hydroxylat<br>ion:83.24;<br>P7:Proline<br>oxidation<br>to<br>pyrrolidino<br>ne:1000.00 |     |     |  |
| 58 | 33 | P026<br>47  | K.DLEEVK.A                                 | Y         | 43,<br>46 | 731,<br>3701      | 6       | 0,<br>9      | 732,<br>3781      | 1 | 2<br>4,<br>9 |          |          | 2,47E+<br>06 |              |              |              | 22           | F22:<br>206<br>9 | 113                                                                                              | 118                                                                                                                                |                                                                                                                                                                  |     |     |  |
| 58 | 33 | P026<br>47  | N.G(+27.99)GARLAEYHAK.A                    | Y         | 42,<br>07 | 1199<br>,604<br>6 | 11      | 7            | 600,<br>8138      | 2 | 2<br>8,<br>7 |          |          | 7,96E+<br>04 | 0            |              |              | 26           | F26:<br>158<br>9 | 209                                                                                              | 219                                                                                                                                | G1:Formyl<br>ation:132.<br>72                                                                                                                                    |     |     |  |
| 58 | 33 | P026<br>47  | R.QGLLPVLE.S                               | Y         | 39        | 867,<br>5065      | 8       | 4,<br>7      | 868,<br>5179      | 1 | 3<br>8,<br>2 |          |          | 1,59E+<br>06 |              |              |              | 19           | F19:<br>332<br>5 | 240                                                                                              | 247                                                                                                                                |                                                                                                                                                                  |     |     |  |
| 58 | 33 | P026<br>47  | R.LEALK.E                                  | Y         | 29,<br>27 | 572,<br>3533      | 5       | 0,<br>3      | 573,<br>3608      | 1 | 1<br>9,<br>7 |          |          | 8,14E+<br>05 |              |              |              | 22           | F22:<br>158<br>3 | 202                                                                                              | 206                                                                                                                                |                                                                                                                                                                  |     |     |  |
| 58 | 33 | P026<br>47  | R.QRLAAR(-<br>43.05)LEALKENGGAR(+15.99).L  | Y         | 25,<br>04 | 1824<br>,980<br>6 | 17      | 1,<br>3      | 913,<br>4988      | 2 | 4<br>0,<br>8 |          | 2,74E+06 |              |              |              |              | 10           | F10:<br>341<br>7 | 196                                                                                              | 212                                                                                                                                | R6:Arginin<br>e<br>oxidation<br>to<br>glutamic<br>semialdeh<br>yde:0.00;R                                                                                        |     |     |  |

|    |   |            |                                  |   |           |                   |    |         |                   |              |          |          |              |    |                  |     |     |                                               |                                       |
|----|---|------------|----------------------------------|---|-----------|-------------------|----|---------|-------------------|--------------|----------|----------|--------------|----|------------------|-----|-----|-----------------------------------------------|---------------------------------------|
| 14 | 5 | P026<br>71 | R.NPSSAGSWNSGSSGPGSTGNR.N        | Y | 11<br>0,9 | 1962<br>,841<br>6 | 21 | 1,<br>1 | 982,<br>4291      | 2<br>6,<br>6 | 0        | 0        | 1,44E+<br>06 | 24 | F24:<br>225<br>0 | 288 | 308 | 17:Oxidati<br>on or<br>Hydroxylat<br>ion:2.44 |                                       |
| 14 | 5 | P026<br>71 | R.GGSTSYGTGETESPR.N              | Y | 91,<br>94 | 1571<br>,669<br>9 | 16 | 6,<br>6 | 786,<br>8474      | 2<br>4,<br>8 | 7,25E+06 | 9,22E+06 | 2,48E+<br>06 | 11 | F11:<br>197<br>5 | 272 | 287 | 0                                             |                                       |
| 14 | 5 | P026<br>71 | K.TFPGFFSPM(+15.99)JGFEVSETESR.G | Y | 87,<br>63 | 2280<br>,040<br>8 | 20 | 9,<br>1 | 1141<br>,038<br>1 | 2<br>7,<br>6 |          | 4,14E+05 |              | 11 | F11:<br>304<br>1 | 528 | 547 | Oxidation<br>(M)                              | M9:Oxidat<br>ion<br>(M):1000.0<br>0   |
| 14 | 5 | P026<br>71 | R.HRHPDEAAFFDTASTGK.T            | Y | 87,<br>63 | 1885<br>,870<br>6 | 17 | 6,<br>4 | 629,<br>6348      | 3<br>8,<br>7 | 2,02E+07 | 1,73E+07 |              | 2  | F2:2<br>330      | 511 | 527 |                                               |                                       |
| 14 | 5 | P026<br>71 | R.HPDEAAFFDTASTGK.T              | Y | 80,<br>29 | 1592<br>,710<br>7 | 15 | 8,<br>3 | 797,<br>3693      | 2<br>9,<br>6 | 1,15E+07 | 1,15E+07 |              | 2  | F2:2<br>413      | 513 | 527 |                                               |                                       |
| 14 | 5 | P026<br>71 | K.MADEAGSEADHEGTHSTK.R           | Y | 73,<br>01 | 1871<br>,759<br>2 | 18 | 2,<br>9 | 936,<br>8842      | 2<br>5,<br>6 |          | 0        |              | 14 | F14:<br>121<br>3 | 603 | 620 |                                               |                                       |
| 14 | 5 | P026<br>71 | K.TVIGPDGHKEVTK.E                | Y | 73,<br>01 | 1379<br>,740<br>8 | 13 | 9,<br>4 | 690,<br>8842      | 2<br>4,<br>2 |          |          | 2,17E+<br>06 | 20 | F20:<br>192<br>8 | 468 | 480 |                                               |                                       |
| 14 | 5 | P026<br>71 | R.EVDIKDYEDQQ.Q                  | Y | 72,<br>49 | 1508<br>,699<br>5 | 12 | 2,<br>2 | 755,<br>3586      | 2<br>8,<br>9 |          | 0        |              | 13 | F13:<br>245<br>2 | 191 | 202 |                                               |                                       |
| 14 | 5 | P026<br>71 | R.PGSTGTWNPSSSER.G               | Y | 72,<br>44 | 1431<br>,637<br>8 | 14 | 1,<br>4 | 716,<br>8272      | 2<br>7,<br>4 | 0        | 1,18E+06 | 2,31E+<br>05 | 13 | F13:<br>231<br>3 | 354 | 367 |                                               |                                       |
| 14 | 5 | P026<br>71 | K.ESSSHHPGIAEPPSR.G              | Y | 70,<br>79 | 1636<br>,759<br>3 | 15 | 7,<br>1 | 546,<br>5976      | 3<br>6,<br>7 | 8,41E+06 | 1,08E+07 | 5,63E+<br>06 | 20 | F20:<br>217<br>0 | 559 | 573 |                                               |                                       |
| 14 | 5 | P026<br>71 | R.GSESGIFTNTK.E                  | Y | 69,<br>62 | 1139<br>,545<br>9 | 11 | 5,<br>4 | 570,<br>7833      | 2<br>7,<br>2 |          |          | 4,43E+<br>06 | 21 | F21:<br>222<br>1 | 548 | 558 |                                               |                                       |
| 14 | 5 | P026<br>71 | R.PGSTGTW(+15.99)NPGSSER.G       | Y | 68,<br>64 | 1447<br>,632<br>8 | 14 | 8       | 724,<br>8295      | 2<br>6,<br>2 |          | 0        |              | 12 | F12:<br>210<br>0 | 354 | 367 | Oxidation<br>(HW)                             | W7:Oxidat<br>ion<br>(HW):1000.<br>.00 |
| 14 | 5 | P026<br>71 | K.EKVTSSTTTTR.R                  | Y | 65,<br>38 | 1266<br>,641<br>6 | 12 | 7,<br>7 | 634,<br>3329      | 2<br>7,<br>3 |          |          | 1,80E+<br>05 | 20 | F20:<br>136<br>0 | 447 | 458 |                                               |                                       |
| 14 | 5 | P026<br>71 | K.TFPGFFSPM(+15.99)JGFEVSETES.S  | Y | 62,<br>73 | 2036<br>,907<br>7 | 18 | 12      | 1019<br>,473<br>2 | 2<br>3<br>9  | 7,32E+05 | 1,02E+06 |              | 2  | F2:3<br>161      | 528 | 545 | Oxidation<br>(M)                              | M9:Oxidat<br>ion<br>(M):1000.0<br>0   |
| 14 | 5 | P026<br>71 | M.JGFEVSETESR.G                  | Y | 62,<br>15 | 1252<br>,593<br>5 | 11 | 8,<br>6 | 627,<br>3094      | 2<br>8,<br>9 | 6,43E+06 | 3,31E+06 | 6,73E+<br>05 | 2  | F2:2<br>349      | 537 | 547 |                                               |                                       |
| 14 | 5 | P026<br>71 | K.VTSGSTTTTR.R                   | Y | 61,<br>61 | 1009<br>,504      | 10 | 1,<br>9 | 505,<br>7603      | 2<br>1,<br>4 | 1,20E+06 | 0        | 3,55E+<br>05 | 22 | F22:<br>802      | 449 | 458 |                                               |                                       |
| 14 | 5 | P026<br>71 | D.LGLSLGIGTLDR.H                 | Y | 60,<br>63 | 1405<br>,756<br>5 | 14 | 2,<br>4 | 703,<br>8872      | 2<br>6,<br>6 |          | 2,95E+06 |              | 10 | F10:<br>306<br>9 | 497 | 510 |                                               |                                       |
| 14 | 5 | P026<br>71 | K.QFTSSTSYNR.G                   | Y | 58,<br>78 | 1189<br>,536<br>4 | 10 | 6,<br>9 | 595,<br>7795      | 2<br>5,<br>5 | 3,77E+05 | 0        |              | 2  | F2:2<br>061      | 582 | 591 |                                               |                                       |
| 14 | 5 | P026<br>71 | R.HRHPDEAAFFDTA.S                | Y | 57,<br>6  | 1512<br>,674<br>6 | 13 | 7,<br>3 | 757,<br>3501      | 2<br>9,<br>9 | 5,00E+06 | 3,00E+06 |              | 2  | F2:2<br>434      | 511 | 523 |                                               |                                       |
| 14 | 5 | P026<br>71 | K.ALTDMPQMR.M                    | Y | 56,<br>56 | 1061<br>,499<br>8 | 9  | 1,<br>4 | 531,<br>7579      | 2<br>2,<br>2 | 0        | 1,15E+06 |              | 1  | F1:2<br>668      | 250 | 258 |                                               |                                       |
| 14 | 5 | P026<br>71 | K.TVIGPDGHK.E                    | Y | 56,<br>08 | 922,<br>4872      | 9  | 0,<br>3 | 308,<br>5029      | 3<br>6,<br>2 | 2,44E+07 | 2,40E+07 | 1,91E+<br>07 | 23 | F23:<br>128<br>6 | 468 | 476 |                                               |                                       |
| 14 | 5 | P026<br>71 | F.FDTASTGK.T                     | Y | 53,<br>17 | 825,<br>3868      | 8  | 5,<br>7 | 413,<br>7031      | 2<br>1,<br>6 |          | 2,33E+05 | 4,61E+<br>06 | 20 | F20:<br>170<br>3 | 520 | 527 |                                               |                                       |



|    |   |            |                              |   |           |                   |    |         |              |                   |          |              |    |                  |     |     |                                      |                                                                         |
|----|---|------------|------------------------------|---|-----------|-------------------|----|---------|--------------|-------------------|----------|--------------|----|------------------|-----|-----|--------------------------------------|-------------------------------------------------------------------------|
| 14 | 5 | P026<br>71 | E.VSGNVSPGTR.R               | Y | 52,<br>42 | 972,<br>4988      | 10 | 3       | 487,<br>2582 | 2<br>5,<br>3      | 9,33E+05 | 1,81E+06     | 10 | F10:<br>201<br>4 | 416 | 425 |                                      |                                                                         |
| 14 | 5 | P026<br>71 | L.SGIGTLDGFR.H               | Y | 52,<br>07 | 1021<br>,519<br>2 | 10 | 1,<br>7 | 511,<br>7678 | 2<br>3,<br>7      | 1,98E+06 | 2,44E+06     | 1  | F1:2<br>810      | 501 | 510 |                                      |                                                                         |
| 14 | 5 | P026<br>71 | K.ALTD(+15.99)PQM(+15.99)R.M | Y | 52,<br>03 | 1093<br>,489<br>6 | 9  | 8,<br>3 | 547,<br>7567 | 2<br>4,<br>6      | 2,64E+06 | 3,05E+06     | 2  | F2:1<br>983      | 250 | 258 | Oxidation<br>(M)                     | M5:Oxidat<br>ion<br>(M):1000.0<br>0;M8:Oxid<br>ation<br>(M):1000.0<br>0 |
| 14 | 5 | P026<br>71 | E.SGIFTNTK.E                 | Y | 49,<br>79 | 866,<br>4498      | 8  | 2,<br>2 | 434,<br>2331 | 2<br>3<br>0,<br>1 | 3,11E+06 | 2,80E+06     | 1  | F1:2<br>463      | 551 | 558 |                                      |                                                                         |
| 14 | 5 | P026<br>71 | R.VSEDLR.S                   | Y | 48,<br>62 | 717,<br>3657      | 6  | 1,<br>9 | 359,<br>6895 | 2<br>1<br>9       | 5,30E+05 | 5,41E+05     | 23 | F23:<br>154<br>6 | 130 | 135 |                                      |                                                                         |
| 14 | 5 | P026<br>71 | R.M(+15.99)ELERPGGNEITR.G    | Y | 48,<br>26 | 1516<br>,730<br>3 | 13 | 5,<br>2 | 506,<br>5867 | 2<br>3<br>6,<br>4 | 4,19E+06 | 5,03E+06     | 11 | F11:<br>212<br>0 | 259 | 271 | Oxidation<br>(M)                     | M1:Oxidat<br>ion<br>(M):1000.0<br>0                                     |
| 14 | 5 | P026<br>71 | K.TFPGFFSPM(+15.99)LGEF.V    | Y | 45,<br>52 | 1491<br>,674<br>4 | 13 | 5,<br>2 | 746,<br>8484 | 2<br>3<br>9,<br>1 |          | 1,81E+<br>06 | 20 | F20:<br>321<br>1 | 528 | 540 | Oxidation<br>(M)                     | M9:Oxidat<br>ion<br>(M):1000.0<br>0                                     |
| 14 | 5 | P026<br>71 | R.HRHPDEAAF.F                | Y | 45,<br>5  | 1078<br>,494<br>4 | 9  | 6,<br>7 | 540,<br>2581 | 2<br>2<br>4,<br>4 |          | 2,79E+<br>07 | 20 | F20:<br>194<br>9 | 511 | 519 |                                      |                                                                         |
| 14 | 5 | P026<br>71 | K.EVVTSED.G                  | Y | 44,<br>78 | 777,<br>3392      | 7  | 0,<br>8 | 778,<br>3471 | 1<br>8,<br>8      | 2,18E+05 | 1,71E+05     | 24 | F24:<br>151<br>1 | 481 | 487 |                                      |                                                                         |
| 14 | 5 | P026<br>71 | K.VPPEWK.A                   | Y | 44,<br>22 | 754,<br>4014      | 6  | 1,<br>8 | 378,<br>2086 | 2<br>2<br>9,<br>7 | 4,57E+05 |              | 1  | F1:2<br>423      | 244 | 249 |                                      |                                                                         |
| 14 | 5 | P026<br>71 | R.GSAGHWTSES.S               | Y | 44,<br>17 | 1017<br>,415<br>2 | 10 | 1,<br>2 | 509,<br>7143 | 2<br>2<br>0,<br>6 | 0        | 9,09E+04     | 23 | F23:<br>169<br>2 | 368 | 377 |                                      |                                                                         |
| 14 | 5 | P026<br>71 | P.GIAEPPSR.G                 | Y | 43,<br>72 | 875,<br>4501      | 8  | 1,<br>9 | 438,<br>7331 | 2<br>3<br>1,<br>2 | 3,62E+05 |              | 1  | F1:2<br>577      | 566 | 573 |                                      |                                                                         |
| 14 | 5 | P026<br>71 | K.TFPGFF.S                   | Y | 42,<br>62 | 714,<br>3376      | 6  | 2,<br>9 | 715,<br>347  | 1<br>3<br>9       | 4,97E+06 | 4,56E+06     | 19 | F19:<br>339<br>5 | 528 | 533 |                                      |                                                                         |
| 14 | 5 | P026<br>71 | T.VIGPDGHK.E                 | Y | 41,<br>22 | 821,<br>4395      | 8  | -1      | 411,<br>7266 | 2<br>1<br>3,<br>8 | 6,16E+05 |              | 5  | F5:1<br>075      | 469 | 476 |                                      |                                                                         |
| 14 | 5 | P026<br>71 | K.ESSSHHPGIA.E               | Y | 40,<br>66 | 1020<br>,462<br>5 | 10 | 4,<br>6 | 511,<br>2408 | 2<br>2<br>1,<br>7 | 1,69E+05 | 4,08E+05     | 2  | F2:1<br>739      | 559 | 568 |                                      |                                                                         |
| 14 | 5 | P026<br>71 | K.TVIGPDGHK.E.V              | Y | 39,<br>19 | 1051<br>,529<br>8 | 10 | 3,<br>6 | 526,<br>774  | 2<br>2<br>6,<br>7 | 9,39E+06 | 1,54E+07     | 1  | F1:2<br>140      | 468 | 477 |                                      |                                                                         |
| 14 | 5 | P026<br>71 | K.QLEQVIK.D                  | Y | 38,<br>53 | 927,<br>5389      | 8  | 0,<br>1 | 464,<br>7767 | 2<br>2<br>7,<br>9 |          | 0            | 15 | F15:<br>240<br>4 | 203 | 210 |                                      |                                                                         |
| 14 | 5 | P026<br>71 | S.SHHPGIAEPPSR.G             | Y | 38,<br>06 | 1333<br>,652<br>7 | 12 | 1,<br>6 | 445,<br>5589 | 3<br>3<br>0,<br>3 | 1,18E+06 |              | 1  | F1:2<br>483      | 562 | 573 |                                      |                                                                         |
| 14 | 5 | P026<br>71 | K.TFPGFFSPM(+15.99)LGE.F     | Y | 37,<br>17 | 1344<br>,606      | 12 | 5,<br>8 | 673,<br>3141 | 2<br>2<br>6,<br>7 |          | 0            | 21 | F21:<br>303<br>0 | 528 | 539 | Oxidation<br>(M)                     | M9:Oxidat<br>ion<br>(M):1000.0<br>0                                     |
| 14 | 5 | P026<br>71 | K.TFP(+15.99)GFF.S           | Y | 36,<br>55 | 730,<br>3326      | 6  | 3,<br>7 | 731,<br>3426 | 1<br>3<br>8,<br>1 | 5,26E+05 |              | 1  | F1:3<br>206      | 528 | 533 | Oxidation<br>or<br>Hydroxyla<br>tion | P3:Oxidati<br>on<br>or<br>Hydroxylat<br>ion:1000.0<br>0                 |
| 14 | 5 | P026<br>71 | E.KVTSGSTTTR.R               | Y | 36,<br>04 | 1137<br>,599      | 11 | 2,<br>6 | 569,<br>8082 | 2<br>2<br>1,<br>8 | 1,40E+05 | 2,14E+<br>05 | 19 | F19:<br>173<br>9 | 448 | 458 |                                      |                                                                         |
| 14 | 5 | P026<br>71 | S.GIGTLDGFR.H                | Y | 35,<br>68 | 934,<br>4872      | 9  | 6,<br>7 | 468,<br>254  | 2<br>3<br>1,      | 3,10E+05 |              | 12 | F12:<br>254      | 502 | 510 |                                      |                                                                         |

|    |   |            |                                                        |   |           |                   |    |         |                   |   | 3            |          |          |              |    | 4                |     |             |                  |                                                                                                     |  |
|----|---|------------|--------------------------------------------------------|---|-----------|-------------------|----|---------|-------------------|---|--------------|----------|----------|--------------|----|------------------|-----|-------------|------------------|-----------------------------------------------------------------------------------------------------|--|
| 14 | 5 | P026<br>71 | K.TFPGFFSPM(+15.99).L                                  | Y | 34,<br>9  | 1045<br>,457<br>9 | 9  | 7,<br>4 | 1046<br>,472<br>9 | 1 | 3<br>5,<br>4 | 2,87E+06 | 2,94E+06 | 5,43E+<br>05 | 11 | F11:<br>287<br>5 | 528 | 536         | Oxidation<br>(M) | M9:Oxidati<br>on<br>(M):1000.0<br>0                                                                 |  |
| 14 | 5 | P026<br>71 | R.GSESGIFTN.T                                          | Y | 33,<br>73 | 910<br>4032       | 9  | 7,<br>2 | 911,<br>417       | 1 | 2<br>9       | 7,19E+05 |          |              | 3  | F3:2<br>362      | 548 | 556         |                  |                                                                                                     |  |
| 14 | 5 | P026<br>71 | K.TFPGFFSP(+15.99)MLG.E                                | Y | 33,<br>25 | 1215<br>,563<br>4 | 11 | 3,<br>4 | 608,<br>791       | 2 | 3<br>7       |          |          | 8,12E+<br>04 | 20 | F20:<br>304<br>5 | 528 | 538         |                  | P8:Oxidati<br>on or<br>Hydroxylat<br>ion:22.45                                                      |  |
| 14 | 5 | P026<br>71 | K.TFPGFFSPM(+15.99).L.G                                | Y | 32,<br>43 | 1158<br>,542      | 10 | 4,<br>5 | 580,<br>2809      | 2 | 3<br>8       | 1,77E+05 | 1,49E+05 | 1,57E+<br>05 | 2  | F2:3<br>085      | 528 | 537         | Oxidation<br>(M) | M9:Oxidati<br>on<br>(M):1000.0<br>0                                                                 |  |
| 14 | 5 | P026<br>71 | V.IGPDGHK.E                                            | Y | 31,<br>45 | 722,<br>3711      | 7  | 2,<br>7 | 362,<br>1938      | 2 | 1<br>8,<br>5 | 0        |          |              | 4  | F4:1<br>520      | 470 | 476         |                  |                                                                                                     |  |
| 14 | 5 | P026<br>71 | R.TGKEKIVSGSTTTT.R.S                                   | Y | 30,<br>05 | 1708<br>,906<br>7 | 16 | 7,<br>1 | 428,<br>237       | 4 | 1<br>8,<br>5 |          |          | 4,54E+<br>04 | 21 | F21:<br>146<br>4 | 444 | 459         |                  |                                                                                                     |  |
| 14 | 5 | P026<br>71 | L.TDMPQMR.M                                            | Y | 27,<br>43 | 877,<br>3786      | 7  | 2,<br>8 | 439,<br>6978      | 2 | 2<br>9       | 6,81E+05 |          |              | 1  | F1:2<br>357      | 252 | 258         |                  |                                                                                                     |  |
| 14 | 5 | P026<br>71 | R.HPDEAAFFDTA.S                                        | Y | 27,<br>1  | 1219<br>,514<br>5 | 11 | 6,<br>6 | 610,<br>7686      | 2 | 1,<br>3      | 1,24E+06 |          |              | 2  | F2:2<br>558      | 513 | 523         |                  |                                                                                                     |  |
| 14 | 5 | P026<br>71 | K.TFPGFFSP(+15.99)ML.G                                 | Y | 26,<br>4  | 1158<br>,542      | 10 | 6,<br>7 | 580,<br>2822      | 2 | 3<br>7,<br>6 |          |          | 2,52E+<br>05 | 20 | F20:<br>309<br>7 | 528 | 537         |                  | P8:Oxidati<br>on or<br>Hydroxylat<br>ion:46.87                                                      |  |
| 14 | 5 | P026<br>71 | K.TFPGF.F                                              | Y | 26,<br>34 | 567,<br>2693      | 5  | 5,<br>4 | 568,<br>2796      | 1 | 2,<br>9      |          |          | 7,47E+<br>05 | 20 | F20:<br>272<br>6 | 528 | 532         |                  |                                                                                                     |  |
| 14 | 5 | P026<br>71 | K.TVIGPD.G                                             | Y | 26,<br>23 | 600,<br>3119      | 6  | 3       | 601,<br>321       | 1 | 1<br>8,<br>9 | 2,78E+05 |          |              | 1  | F1:2<br>351      | 468 | 473         |                  |                                                                                                     |  |
| 14 | 5 | P026<br>71 | R.GSESGIF.T                                            | Y | 26,<br>18 | 695,<br>3126      | 7  | 8,<br>2 | 696,<br>3256      | 1 | 0,<br>3      |          | 5,44E+05 |              | 11 | F11:<br>245<br>6 | 548 | 554         |                  |                                                                                                     |  |
| 14 | 5 | P026<br>71 | K.TFPGFFSP.M                                           | Y | 25,<br>91 | 898,<br>4225      | 8  | 2,<br>9 | 899,<br>4324      | 1 | 3<br>9       | 5,92E+05 |          |              | 1  | F1:3<br>279      | 528 | 535         |                  |                                                                                                     |  |
| 14 | 5 | P026<br>71 | K.NNKD(+15.99)SHSLTTNIMEILR(+31.99)GDFSSANNR(+31.99).D | Y | 25,<br>89 | 3013<br>,379<br>6 | 26 | 6,<br>4 | 1507<br>,706<br>8 | 2 | 3<br>9,<br>2 |          |          | 0            | 35 | F35:<br>246<br>0 | 98  | 123         |                  | D4:Oxidati<br>on or<br>Hydroxylat<br>ion:0.00;R<br>17:Dihydro<br>xy:5.68;R2<br>6:Dihydrox<br>y:9.45 |  |
| 40 | 8 | P026<br>75 | E.AVSQTSSSSFQYMYLLK.D                                  | Y | 75,<br>92 | 1938<br>,939<br>7 | 17 | 3,<br>9 | 970,<br>4809      | 2 | 3<br>7,<br>2 | 4,71E+05 |          |              | 1  | F1:3<br>130      | 136 | 152         |                  |                                                                                                     |  |
| 40 | 8 | P026<br>75 | K.QGFGNVATNTDGK.N                                      | Y | 72,<br>6  | 1307<br>,610<br>6 | 13 | 1       | 654,<br>8132      | 2 | 2<br>9,<br>3 | 5,36E+05 |          | 3,90E+0<br>5 |    | 1,41E+0<br>5     | 1   | F1:2<br>387 | 301              | 313                                                                                                 |  |
| 40 | 8 | P026<br>75 | R.MGPTELLEJEMEDWK.G                                    | Y | 68,<br>43 | 1690<br>,794<br>6 | 14 | 5,<br>6 | 846,<br>4093      | 2 | 1,<br>1      | 2,22E+05 | 0        | 0            | 1  | F1:3<br>449      | 335 | 348         |                  |                                                                                                     |  |
| 40 | 8 | P026<br>75 | K.HGTDDGVVWMNWK.G                                      | Y | 67,<br>56 | 1543<br>,687<br>7 | 13 | 11      | 772,<br>8599      | 2 | 6,<br>2      | 4,76E+05 |          |              | 1  | F1:3<br>035      | 459 | 471         |                  |                                                                                                     |  |
| 40 | 8 | P026<br>75 | K.HQLYIDETVNSNIPNLR.V                                  | Y | 59,<br>19 | 2126<br>,075<br>7 | 18 | 5,<br>8 | 1064<br>,051<br>3 | 2 | 5,<br>3      |          |          | 0            | 76 | F76:<br>212<br>8 | 179 | 196         |                  |                                                                                                     |  |
| 40 | 8 | P026<br>75 | E.NGGWTVIQNR.Q                                         | Y | 58,<br>01 | 1143<br>,578<br>5 | 10 | 1,<br>6 | 572,<br>7974      | 2 | 2,<br>2      | 7,86E+05 |          |              | 1  | F1:2<br>669      | 276 | 285         |                  |                                                                                                     |  |
| 40 | 8 | P026<br>75 | R.QDGSVDFGR.K                                          | Y | 53,<br>85 | 979,<br>4359      | 9  | 7,<br>6 | 490,<br>7289      | 2 | 2<br>6,<br>5 | 9,35E+05 |          | 2,05E+<br>06 | 3  | F3:2<br>152      | 286 | 294         |                  |                                                                                                     |  |
| 40 | 8 | P026<br>75 | K.AHYGGFTVQNEANK.Y                                     | Y | 53,<br>09 | 1534<br>,716<br>4 | 14 | -<br>14 | 768,<br>3551      | 2 | 7,<br>7      |          | 0        |              | 15 | F15:<br>238<br>8 | 354 | 367         |                  |                                                                                                     |  |

|    |    |            |                                      |   |            |                   |    |         |                   |   |         |          |          |              |              |                  |              |              |                  |                                     |             |                  |                                 |  |  |
|----|----|------------|--------------------------------------|---|------------|-------------------|----|---------|-------------------|---|---------|----------|----------|--------------|--------------|------------------|--------------|--------------|------------------|-------------------------------------|-------------|------------------|---------------------------------|--|--|
| 40 | 8  | P026<br>75 | K.ISQLTR.M                           | Y | 46,<br>78  | 716,<br>4181      | 6  | 0,<br>9 | 359,<br>2166      | 2 | 9,<br>1 | 0        | 0        | 0            | 24           | F24:<br>154<br>1 | 329          | 334          |                  |                                     |             |                  |                                 |  |  |
| 40 | 8  | P026<br>75 | E.TVNSNIPTNLR.V                      | Y | 45,<br>83  | 1227<br>,657<br>1 | 11 | 3,<br>2 | 614,<br>8378      | 2 | 0,<br>8 | 3,01E+06 |          |              | 1            | F1:2<br>535      | 186          | 196          |                  |                                     |             |                  |                                 |  |  |
| 40 | 8  | P026<br>75 | E.MYLIQPDSSVKPYR.V                   | Y | 39,<br>75  | 1695<br>,865<br>4 | 14 | 2,<br>2 | 566,<br>297       | 3 | 3,<br>5 | 1,88E+06 |          |              | 1            | F1:2<br>797      | 254          | 267          |                  |                                     |             |                  |                                 |  |  |
| 40 | 8  | P026<br>75 | K.IRPPFPQQ                           | Y | 38,<br>97  | 1031<br>,555<br>2 | 8  | 7,<br>8 | 516,<br>7889      | 2 | 1,<br>4 | 1,02E+06 | 7,47E+05 |              | 3            | F3:2<br>568      | 484          | 491          |                  |                                     |             |                  |                                 |  |  |
| 40 | 8  | P026<br>75 | E.ALLQQRPIR.N                        | Y | 38,<br>7   | 1222<br>,714<br>6 | 10 | 2,<br>3 | 612,<br>366       | 2 | 0,<br>2 | 1,70E+06 |          |              | 1            | F1:2<br>470      | 115          | 124          |                  |                                     |             |                  |                                 |  |  |
| 40 | 8  | P026<br>75 | K.YQSVNK.Y                           | Y | 38,<br>19  | 850,<br>4548      | 7  | 7,<br>6 | 426,<br>2379      | 2 | 6,<br>7 | 0        | 2,89E+05 |              | 3            | F3:2<br>168      | 368          | 374          |                  |                                     |             |                  |                                 |  |  |
| 40 | 8  | P026<br>75 | K.EDGGGWYWR.C                        | Y | 37,<br>75  | 1238<br>,510<br>5 | 10 | 4       | 620,<br>265       | 2 | 5<br>2  | 4,85E+03 |          |              | 1            | F1:4<br>0        | 427          | 436          |                  |                                     |             |                  |                                 |  |  |
| 40 | 8  | P026<br>75 | E.EAPSLRPAPPISGGGYR.A                | Y | 32,<br>17  | 1820<br>,953<br>2 | 18 | 2,<br>4 | 607,<br>9932      | 3 | 3<br>2  |          | 2,16E+06 |              | 10           | F10:<br>265<br>3 | 55           | 72           |                  |                                     |             |                  |                                 |  |  |
| 40 | 8  | P026<br>75 | R.MGPTELLIE.M                        | Y | 31,<br>48  | 1001<br>,510<br>3 | 9  | 3,<br>1 | 1002<br>,520<br>7 | 1 | 7,<br>1 | 8,78E+05 | 5,49E+05 |              | 10           | F10:<br>311<br>3 | 335          | 343          |                  |                                     |             |                  |                                 |  |  |
| 63 | 15 | P026<br>79 | K.YEASILTHDSSIR.Y                    | Y | 80,<br>25  | 1490<br>,736<br>5 | 13 | 3,<br>3 | 746,<br>3779      | 2 | 1,<br>9 | 1,20E+06 |          | 1,15E+0<br>6 | 6,73E+<br>05 | 1                | F1:2<br>644  | 122          | 134              |                                     |             |                  |                                 |  |  |
| 63 | 15 | P026<br>79 | K.VGPEADKYR.L                        | Y | 67,<br>22  | 1033<br>,519<br>2 | 9  | 1       | 517,<br>7674      | 2 | 4,<br>3 | 8,94E+05 | 0        |              | 5            | F5:2<br>068      | 293          | 301          |                  |                                     |             |                  |                                 |  |  |
| 63 | 15 | P026<br>79 | E.IDGSGNGWTVFQK.R                    | Y | 59,<br>38  | 1407<br>,678<br>2 | 13 | 2,<br>7 | 704,<br>8483      | 2 | 4,<br>2 |          | 1,52E+06 |              | 10           | F10:<br>284<br>9 | 210          | 222          |                  |                                     |             |                  |                                 |  |  |
| 63 | 15 | P026<br>79 | R.TSTADYAMFK.V                       | Y | 55,<br>96  | 1133<br>,506<br>3 | 10 | 3,<br>1 | 567,<br>7622      | 2 | 2,<br>5 | 9,74E+05 |          |              | 1            | F1:2<br>702      | 283          | 292          |                  |                                     |             |                  |                                 |  |  |
| 63 | 15 | P026<br>79 | K.QSGLYFIKPLK.A                      | Y | 53,<br>28  | 1292<br>,749<br>3 | 11 | 2,<br>7 | 647,<br>3837      | 2 | 3<br>5  | 3,68E+06 | 1,93E+06 |              | 1            | F1:2<br>930      | 189          | 199          |                  |                                     |             |                  |                                 |  |  |
| 63 | 15 | P026<br>79 | K.EFGHLSPTGTTEFWLGNEK.I              | Y | 46,<br>33  | 2206<br>,033      | 20 | 1       | 736,<br>3524      | 3 | 4,<br>7 | 0        | 0        |              | 5            | F5:3<br>066      | 239          | 258          |                  |                                     |             |                  |                                 |  |  |
| 63 | 15 | P026<br>79 | K.AIQLYNPDESSKPNMIDAATLK.S           | Y | 42,<br>81  | 2519<br>,257<br>8 | 23 | 2       | 840,<br>7616      | 3 | 5,<br>1 | 1,07E+06 |          |              | 1            | F1:2<br>939      | 89           | 111          |                  |                                     |             |                  |                                 |  |  |
| 63 | 15 | P026<br>79 | Q.SGLYFIK(+27.99)PLK.A               | Y | 40,<br>19  | 1192<br>,685<br>5 | 10 | 13      | 597,<br>358       | 2 | 4,<br>7 |          | 0        |              | 19           | F19:<br>301<br>4 | 190          | 199          |                  | K7:Formyl<br>ation:47.0<br>9        |             |                  |                                 |  |  |
| 63 | 15 | P026<br>79 | R.TSTADYAM(+15.99)FK.V               | Y | 38,<br>45  | 1149<br>,501<br>2 | 10 | 6,<br>9 | 575,<br>7618      | 2 | 7,<br>8 | 3,05E+05 |          |              | 3            | F3:2<br>260      | 283          | 292          | Oxidation<br>(M) | M8:Oxidat<br>ion<br>(M):1000.0<br>0 |             |                  |                                 |  |  |
| 63 | 15 | P026<br>79 | R.VELEDWNGR.T                        | Y | 38,<br>22  | 1116<br>,52       | 9  | -<br>14 | 559,<br>2598      | 2 | 0,<br>5 |          | 0        | 0            | 15           | F15:<br>265<br>7 | 274          | 282          |                  |                                     |             |                  |                                 |  |  |
| 63 | 15 | P026<br>79 | K.EFGHLSPTGTTE.F                     | Y | 36,<br>53  | 1331<br>,599<br>4 | 13 | 3,<br>4 | 666,<br>8092      | 2 | 1,<br>8 | 9,54E+05 |          |              | 1            | F1:2<br>633      | 239          | 251          |                  |                                     |             |                  |                                 |  |  |
| 63 | 15 | P026<br>79 | E.ASILTHDSSIR.Y                      | Y | 34,<br>56  | 1198<br>,630<br>6 | 11 | 2,<br>3 | 400,<br>5517      | 3 | 3<br>0  | 4,23E+05 |          |              | 1            | F1:2<br>451      | 124          | 134          |                  |                                     |             |                  |                                 |  |  |
| 3  | 4  | P027<br>51 | R.HTSVQTTSSGSGPFTDVR.A               | Y | 11,<br>5,7 | 1862<br>,875<br>9 | 18 | 7,<br>5 | 932,<br>4522      | 2 | 7,<br>8 | 6,35E+07 | 1,04E+08 | 2,07E+<br>07 | 0            | 5,66E+0<br>4     | F2:2<br>259  | 273          | 290              |                                     |             |                  |                                 |  |  |
| 3  | 4  | P027<br>51 | K.TETITGFQVDVAVPANGQTPQIR.T          | Y | 10,<br>8,6 | 2342<br>,186<br>5 | 22 | 11      | 1172<br>,113<br>9 | 2 | 2,<br>6 | 1,36E+06 | 0        | 4,32E+<br>06 | 2,18E+0<br>6 | 1,78E+0<br>6     | 3,71E+0<br>6 | 3,46E+0<br>6 | 3,32E+0<br>6     | 4,70E+<br>06                        | F2:2<br>660 | 1838             | 185<br>9                        |  |  |
| 3  | 4  | P027<br>51 | K.EINLAPDSSVVVSGLM(+15.99)JAT<br>K.Y | Y | 10,<br>5,2 | 2132<br>,103<br>5 | 21 | 13      | 1067<br>,073<br>1 | 2 | 4,<br>6 | 2,64E+05 | 7,15E+05 |              | 1,47E+0<br>6 | 5,62E+0<br>5     | 3,18E+<br>06 | 11           | F11:<br>280<br>9 | 1767                                | 178<br>7    | Oxidation<br>(M) | M17:Oxida<br>tion<br>(M):1000.0 |  |  |

|   |   |            |                                             |   |           |                   |    |         |                   |   |              |          |          |              |              |              |                  |                  | 0            |              |                  |                                                                 |          |                        |                                     |
|---|---|------------|---------------------------------------------|---|-----------|-------------------|----|---------|-------------------|---|--------------|----------|----------|--------------|--------------|--------------|------------------|------------------|--------------|--------------|------------------|-----------------------------------------------------------------|----------|------------------------|-------------------------------------|
| 3 | 4 | P027<br>51 | R.TKTETITGFQVDAVPANGQTPQR.T                 | Y | 10<br>1,4 | 2571<br>,329<br>3 | 24 | -8      | 1286<br>,661<br>6 | 2 | 3<br>2,<br>2 | 5,88E+06 | 0        | 6,10E+<br>06 |              | 6            | F6:2<br>836      | 1836             | 185<br>9     |              |                  |                                                                 |          |                        |                                     |
| 3 | 4 | P027<br>51 | R.PAQGVVTLLENVSPPR.R                        | Y | 97,<br>49 | 1663<br>,889<br>3 | 16 | 10      | 832,<br>9602      | 2 | 3<br>1,<br>7 | 9,50E+06 | 8,02E+06 |              |              | 2            | F2:2<br>591      | 1803             | 181<br>8     |              |                  |                                                                 |          |                        |                                     |
| 3 | 4 | P027<br>51 | R.EESPLLIQQSTVSDVPR.D                       | Y | 96,<br>28 | 1954<br>,000<br>7 | 18 | 8,<br>7 | 978,<br>0162      | 2 | 3<br>2,<br>2 | 1,41E+07 | 8,20E+06 | 4,77E+<br>06 | 2,20E+0<br>6 | 8,10E+0<br>5 | 2,05E+0<br>6     | 1,59E+0<br>6     | 1,02E+0<br>6 | 2,33E+<br>06 | 2                | F2:2<br>631                                                     | 1435     | 145<br>2               |                                     |
| 3 | 4 | P027<br>51 | R.RPGGEPSPGGTGGQSYNQY.S                     | Y | 94,<br>85 | 2023<br>,887<br>1 | 19 | 8,<br>2 | 1012<br>,959<br>1 | 2 | 2<br>7,<br>3 | 9,26E+05 | 2,57E+06 |              |              | 11           | F11:<br>219<br>5 | 2335             | 235<br>3     |              |                  |                                                                 |          |                        |                                     |
| 3 | 4 | P027<br>51 | R.NLQPASEYTVSLVAIK.G                        | Y | 94,<br>17 | 1731<br>,940<br>7 | 16 | 1,<br>1 | 866,<br>9766      | 2 | 3<br>4,<br>5 | 5,22E+06 | 3,32E+05 | 2,44E+<br>06 |              |              | 4                | F4:3<br>044      | 1055         | 107<br>0     |                  |                                                                 |          |                        |                                     |
| 3 | 4 | P027<br>51 | R.FLATTPNLSLWSWQPPR.A                       | Y | 91,<br>79 | 1926<br>,036<br>3 | 17 | 4,<br>4 | 964,<br>0212      | 2 | 3<br>6,<br>7 | 7,72E+06 | 2,95E+07 | 1,85E+<br>07 |              |              | 15               | F15:<br>321<br>5 | 1911         | 192<br>7     |                  |                                                                 |          |                        |                                     |
| 3 | 4 | P027<br>51 | K.FTQVTPTSLSAQWTPPNVQLTYGR.V                | Y | 90,<br>92 | 2691<br>,365<br>7 | 24 | 2,<br>7 | 1346<br>,686<br>5 | 2 | 3<br>6,<br>1 | 0        | 0        | 0            |              |              | 5                | F5:3<br>188      | 1730         | 175<br>3     |                  |                                                                 |          |                        |                                     |
| 3 | 4 | P027<br>51 | R.TEIDKPSQM(+15.99)QVTDVQDNSIS<br>VK.W      | Y | 90,<br>88 | 2477<br>,195<br>6 | 22 | 9,<br>3 | 826,<br>7468      | 3 | 2<br>8,<br>8 | 1,40E+06 | 9,43E+05 |              |              |              | 3                | F3:2<br>347      | 1540         | 156<br>1     | Oxidation<br>(M) | M9:Oxidat<br>ion<br>(M):1000.0<br>0                             |          |                        |                                     |
| 3 | 4 | P027<br>51 | R.RPHETGGYMLEC(-<br>33.99)VC(+31.99)LGNGK.G | Y | 90,<br>88 | 2060<br>,940<br>7 | 19 | 1,<br>9 | 1031<br>,479<br>6 | 2 | 3<br>4,<br>3 | 1,10E+07 | 6,50E+06 | 2,48E+<br>06 |              |              | 16               | F16:<br>202<br>9 | 156          | 174          |                  | C12:Dehyd<br>roalanine<br>(C):35.51:C<br>14:Dihydro<br>xy:35.51 |          |                        |                                     |
| 3 | 4 | P027<br>51 | R.RPGGEPSPGGTGGQSYNQSR.Y                    | Y | 90,<br>6  | 2395<br>,078<br>9 | 22 | 8,<br>5 | 799,<br>3737      | 3 | 2<br>6,<br>3 | 1,34E+07 | 1,16E+07 |              |              |              | 2                | F2:2<br>131      | 2335         | 235<br>6     |                  |                                                                 |          |                        |                                     |
| 3 | 4 | P027<br>51 | R.VPGTSTSATLGLTR.G                          | Y | 89,<br>69 | 1460<br>,783<br>4 | 15 | 8,<br>9 | 731,<br>4055      | 2 | 3<br>0,<br>1 | 5,01E+07 | 2,57E+07 | 1,96E+<br>07 | 3,67E+0<br>7 | 2,11E+0<br>7 | 3,35E+0<br>7     | 3,61E+0<br>7     | 3,15E+0<br>7 | 3,78E+<br>07 | 11               | F11:<br>244<br>1                                                | 2150     | 216<br>4               |                                     |
| 3 | 4 | P027<br>51 | R.GDSPASSKPSINRY.T                          | Y | 88,<br>11 | 1590<br>,800<br>2 | 15 | 3,<br>5 | 796,<br>4102      | 2 | 2<br>8,<br>9 | 6,76E+06 | 8,54E+06 | 4,43E+<br>06 | 6,20E+0<br>5 | 1,13E+0<br>6 | 2,22E+0<br>6     | 1,28E+0<br>6     | 4,29E+0<br>5 | 1,82E+<br>06 | 13               | F13:<br>245<br>1                                                | 1525     | 153<br>9               |                                     |
| 3 | 4 | P027<br>51 | R.ITYGETGGSVPVQFTVPGSK.S                    | Y | 88,<br>03 | 2167<br>,043<br>2 | 21 | 0       | 1084<br>,528<br>9 | 2 | 3<br>2,<br>9 | 1,54E+07 | 1,60E+07 | 8,92E+<br>06 | 0            |              | 6,84E+0<br>5     |                  |              | 6            | F6:2<br>903      | 1480                                                            | 150<br>0 |                        |                                     |
| 3 | 4 | P027<br>51 | R.SYTITGLQPGTDYK.I                          | Y | 87,<br>95 | 1542<br>,756<br>6 | 14 | 9,<br>6 | 772,<br>3929      | 2 | 3<br>0,<br>7 | 2,03E+07 | 2,25E+07 | 1,45E+<br>07 |              |              | 0                |                  |              | 2            | F2:2<br>505      | 1867                                                            | 188<br>0 |                        |                                     |
| 3 | 4 | P027<br>51 | K.HYQINQQWER.T                              | Y | 86,<br>12 | 1400<br>,658<br>6 | 10 | 1,<br>8 | 701,<br>3353      | 2 | 2<br>8,<br>3 | 1,62E+08 | 1,68E+08 | 1,13E+<br>08 | 2,01E+0<br>8 | 1,26E+0<br>8 | 2,30E+0<br>8     | 1,81E+0<br>8     | 1,55E+0<br>8 | 1,39E+<br>08 | 13               | F13:<br>239<br>5                                                | 58       | 67                     |                                     |
| 3 | 4 | P027<br>51 | R.PRPGVTEATITGLEPTEYTVIALK.N                | Y | 85,<br>73 | 2888<br>,553<br>5 | 27 | 0,<br>3 | 963,<br>8582      | 3 | 3<br>7,<br>4 | 2,97E+07 | 1,46E+07 | 1,06E+<br>07 |              |              |                  |                  |              | 6            | F6:3<br>301      | 1951                                                            | 197<br>7 |                        |                                     |
| 3 | 4 | P027<br>51 | R.SSPVVIDASTAIDAPSNL.R.F                    | Y | 83,<br>08 | 1911<br>,990<br>1 | 19 | 0,<br>2 | 957,<br>0026      | 2 | 3<br>3,<br>6 | 3,14E+07 | 2,22E+07 | 2,49E+<br>07 |              |              |                  |                  |              | 13           | F13:<br>289<br>6 | 1892                                                            | 191<br>0 |                        |                                     |
| 3 | 4 | P027<br>51 | E.VVAATPTSLISWDAPAVTVR.Y                    | Y | 82,<br>59 | 2166<br>,204<br>8 | 21 | 6,<br>4 | 1084<br>,116<br>6 | 2 | 4<br>0,<br>3 | 6,12E+05 |          |              |              |              |                  |                  |              | 1            | F1:3<br>386      | 1456                                                            | 147<br>6 |                        |                                     |
| 3 | 4 | P027<br>51 | K.LGVRPSQGGEAPR.E                           | Y | 82,<br>17 | 1322<br>,705<br>4 | 13 | 1       | 662,<br>3607      | 2 | 2<br>5,<br>5 | 8,41E+06 | 6,92E+06 | 4,53E+<br>06 | 1,17E+0<br>5 | 2,97E+0<br>5 | 9,95E+0<br>4     | 5,47E+0<br>4     | 6,97E+0<br>4 | 5,33E+<br>05 | 13               | F13:<br>212<br>0                                                | 1117     | 112<br>9               |                                     |
| 3 | 4 | P027<br>51 | K.TYHVGEQWQK.E                              | Y | 82,<br>03 | 1274<br>,604<br>4 | 10 | 1,<br>2 | 638,<br>3087      | 2 | 2<br>7,<br>5 | 2,09E+07 | 1,88E+07 | 3,42E+<br>06 | 1,33E+0<br>7 | 5,12E+0<br>6 | 7,47E+0<br>6     | 9,14E+0<br>6     | 4,32E+0<br>6 | 7,08E+<br>06 | 13               | F13:<br>232<br>2                                                | 2301     | 231<br>0               |                                     |
| 3 | 4 | P027<br>51 | K.HYQINQQW(+31.99)JER.T                     | Y | 80,<br>57 | 1432<br>,648<br>3 | 10 | 6,<br>9 | 717,<br>3364      | 2 | 2<br>5,<br>7 | 1,25E+06 | 2,82E+06 |              |              |              |                  |                  |              | 2            | F2:2<br>074      | 58                                                              | 67       | W8:Dihydr<br>oxy:30.36 |                                     |
| 3 | 4 | P027<br>51 | K.HYQINQQW(+15.99)JER.T                     | Y | 78,<br>93 | 1416<br>,653<br>4 | 10 | 7,<br>9 | 709,<br>3396      | 2 | 2<br>6,<br>7 | 1,84E+07 | 1,40E+07 | 2,85E+<br>06 | 2,08E+0<br>6 | 4,21E+0<br>5 | 1,76E+0<br>6     | 3,56E+0<br>6     | 2,29E+0<br>6 | 5,15E+<br>05 | 2                | F2:2<br>164                                                     | 58       | 67                     | W8:Oxidat<br>ion<br>(HW):186.<br>64 |
| 3 | 4 | P027<br>51 | K.YEVSVYALK.D                               | Y | 78,<br>39 | 1070<br>,564      | 9  | -       | 536,<br>2889      | 2 | 3<br>1,<br>1 | 2,53E+06 | 2,75E+06 |              |              |              |                  |                  |              | 15           | F15:<br>275      | 1788                                                            | 179<br>6 |                        |                                     |





|   |   |            |                                                 |   |           |                   |    |              |                   |   |              |          |          |              |              |              |              |                  |                  |                  |                                  |                                                                                                   |                  |                                                                                           |
|---|---|------------|-------------------------------------------------|---|-----------|-------------------|----|--------------|-------------------|---|--------------|----------|----------|--------------|--------------|--------------|--------------|------------------|------------------|------------------|----------------------------------|---------------------------------------------------------------------------------------------------|------------------|-------------------------------------------------------------------------------------------|
| 3 | 4 | P027<br>51 | K.HYQ(+.98)INQQWER.T                            | Y | 58,<br>98 | 1401<br>,642<br>6 | 10 | -<br>1,<br>3 | 701,<br>8276      | 2 | 2<br>8,<br>5 | 1,20E+06 |          | 1,07E+0<br>6 |              | 1,09E+<br>06 | 14           | F14:<br>244<br>0 | 58               | 67               | Q3:Deami<br>dation<br>(NQ):15.64 |                                                                                                   |                  |                                                                                           |
| 3 | 4 | P027<br>51 | V.GDTERPK.D                                     | Y | 58,<br>76 | 964,<br>4614      | 8  | -<br>1,<br>6 | 483,<br>2372      | 2 | 1<br>7       | 1,56E+06 | 1,33E+06 | 1,14E+<br>06 | 8,52E+0<br>4 | 0            | 0            | F24:<br>135<br>4 | 109              | 116              |                                  |                                                                                                   |                  |                                                                                           |
| 3 | 4 | P027<br>51 | R.RPGGEPSPGEGT.G                                | Y | 58,<br>49 | 1183<br>,546<br>9 | 12 | 1,<br>3      | 1184<br>,552<br>6 | 2 | 1,<br>3      | 3,00E+06 | 1,20E+06 | 1,06E+<br>06 |              |              | 6            | F6:1<br>788      | 2335             | 234<br>6         |                                  |                                                                                                   |                  |                                                                                           |
| 3 | 4 | P027<br>51 | K.WLPSSPVTYGR.V                                 | Y | 58,<br>41 | 1348<br>,677<br>5 | 12 | 5,<br>7      | 675,<br>3422      | 2 | 1,<br>7      | 7,88E+06 | 7,74E+06 | 8,06E+<br>06 |              |              | 13           | F13:<br>271<br>8 | 1562             | 157<br>3         |                                  |                                                                                                   |                  |                                                                                           |
| 3 | 4 | P027<br>51 | K.DTLTSRPAQGVVTTLENVSPPR.R                      | Y | 58,<br>09 | 2337<br>,228<br>8 | 22 | 6,<br>8      | 780,<br>0888      | 3 | 2,<br>9      | 1,10E+06 | 1,99E+06 | 0            |              |              | 11           | F11:<br>267<br>2 | 1797             | 181<br>8         |                                  |                                                                                                   |                  |                                                                                           |
| 3 | 4 | P027<br>51 | K.DSM(+15.99)IWDCT(-<br>2.02)CIGAGR.G           | Y | 58,<br>08 | 1540<br>,610<br>8 | 14 | 5,<br>7      | 771,<br>3171      | 2 | 3<br>6       | 1,99E+06 |          | 2,90E+0<br>7 | 9,55E+0<br>6 |              | 1,73E+0<br>7 | 1,92E+0<br>6     | 42               | F42:<br>216<br>3 | 117                              | 130                                                                                               | Oxidation<br>(M) | M3:Oxidat<br>ion<br>(M):1000.0<br>0;T8:2-<br>amino-3-<br>oxo-<br>butanoic_<br>acid:90.57  |
| 3 | 4 | P027<br>51 | R.RPHETGGYM(+15.99)LECVCLGNGK(-<br>2.02).G      | Y | 57,<br>59 | 2076<br>,918      | 19 | 6,<br>4      | 693,<br>3177      | 3 | 3<br>3       | 4,51E+05 |          | 2,29E+0<br>7 | 7,47E+0<br>6 | 6,06E+0<br>5 | 2,15E+0<br>7 | 1,04E+0<br>7     | 34               | F34:<br>194<br>2 | 156                              | 174                                                                                               | Oxidation<br>(M) | M9:Oxidat<br>ion<br>(M):1000.0<br>0;K19:2-<br>amino-3-<br>oxo-<br>butanoic_<br>acid:81.27 |
| 3 | 4 | P027<br>51 | T.SSGSGPFTDVR.A                                 | Y | 57,<br>34 | 1108<br>,514<br>9 | 11 | 6,<br>7      | 555,<br>2684      | 2 | 2<br>7,<br>3 |          |          | 1,28E+<br>07 |              |              |              | 20               | F20:<br>223<br>0 | 280              | 290                              |                                                                                                   |                  |                                                                                           |
| 3 | 4 | P027<br>51 | S.SGSGPFTDVR.A                                  | Y | 56,<br>87 | 1021<br>,482<br>8 | 10 | 5,<br>6      | 511,<br>7516      | 2 | 2<br>7,<br>9 | 1,03E+07 | 1,18E+07 | 1,31E+<br>07 |              |              | 2            | F2:2<br>263      | 281              | 290              |                                  |                                                                                                   |                  |                                                                                           |
| 3 | 4 | P027<br>51 | R.IGDQWQKQHD.M                                  | Y | 56,<br>8  | 1240<br>,547<br>2 | 10 | 2,<br>6      | 621,<br>2825      | 2 | 2<br>7,<br>8 |          |          | 1,07E+<br>06 |              |              | 19           | F19:<br>231<br>3 | 480              | 489              |                                  |                                                                                                   |                  |                                                                                           |
| 3 | 4 | P027<br>51 | R.N(+.98)LQPASEYTVSLVAIK.G                      | Y | 56,<br>64 | 1732<br>,924<br>7 | 16 | -<br>3,<br>2 | 867,<br>4669      | 2 | 4,<br>3      |          |          | 0            |              |              | 22           | F22:<br>297<br>6 | 1055             | 107<br>0         | N1:Deami<br>dation<br>(NQ):14.04 |                                                                                                   |                  |                                                                                           |
| 3 | 4 | P027<br>51 | K.YVHGVR.Y                                      | Y | 56        | 729,<br>3922      | 6  | 0,<br>2      | 365,<br>7035      | 2 | 4,<br>3      | 8,22E+05 | 6,79E+04 | 0            |              |              | 4            | F4:1<br>112      | 579              | 584              |                                  |                                                                                                   |                  |                                                                                           |
| 3 | 4 | P027<br>51 | K.DSM(+15.99)IWDCT(-<br>33.99)TC(+31.99)IGAGR.G | Y | 55,<br>86 | 1540<br>,628<br>7 | 14 | 1,<br>8      | 771,<br>323       | 2 | 5,<br>7      | 4,64E+06 |          | 1,18E+0<br>6 |              |              | 36           | F36:<br>217<br>1 | 117              | 130              | Oxidation<br>(M)                 | M3:Oxidat<br>ion<br>(M):1000.0<br>0;C7:Dehy<br>droalanine<br>(C):18.53;C<br>9:Dihydrox<br>y:18.53 |                  |                                                                                           |
| 3 | 4 | P027<br>51 | K.IGDTWR.R                                      | Y | 55,<br>74 | 746,<br>3711      | 6  | -<br>0,<br>3 | 374,<br>1927      | 2 | 2<br>7       | 1,03E+08 | 9,37E+07 | 7,28E+<br>07 |              |              | 15           | F15:<br>232<br>0 | 150              | 155              |                                  |                                                                                                   |                  |                                                                                           |
| 3 | 4 | P027<br>51 | R.TYLGALVCTCY(-2.02)GGSR.G                      | Y | 55,<br>66 | 1674<br>,749<br>4 | 16 | 6,<br>6      | 838,<br>3875      | 2 | 3<br>6       |          | 3,56E+06 |              | 6,58E+0<br>4 |              | 2,23E+<br>06 | 73               | F73:<br>217<br>8 | 68               | 83                               | Y12:2-<br>amino-3-<br>oxo-<br>butanoic_<br>acid:0.00                                              |                  |                                                                                           |
| 3 | 4 | P027<br>51 | K.SEPLGR.K                                      | Y | 55,<br>61 | 770,<br>4286      | 7  | 0,<br>2      | 386,<br>2216      | 2 | 2<br>7,<br>3 | 1,19E+07 | 1,02E+07 | 1,15E+<br>07 |              |              | 15           | F15:<br>234<br>9 | 1982             | 198<br>8         |                                  |                                                                                                   |                  |                                                                                           |
| 3 | 4 | P027<br>51 | R.ESKPLTAQQT.K.L                                | Y | 55,<br>46 | 1330<br>,709<br>2 | 12 | 8,<br>6      | 666,<br>3676      | 2 | 2<br>3       | 1,51E+05 | 3,13E+05 |              |              |              | 3            | F3:1<br>853      | 985              | 996              |                                  |                                                                                                   |                  |                                                                                           |
| 3 | 4 | P027<br>51 | R.HRPRYPYPNVGEEIQGHIPR.E                        | Y | 54,<br>82 | 2461<br>,309<br>1 | 21 | 5,<br>3      | 616,<br>3378      | 4 | 1,<br>4      | 6,69E+05 | 6,67E+05 |              |              |              | 12           | F12:<br>255<br>6 | 2071             | 209<br>1         |                                  |                                                                                                   |                  |                                                                                           |
| 3 | 4 | P027<br>51 | R.RTTPPTATPIR.H                                 | Y | 54,<br>64 | 1310<br>,730<br>6 | 12 | 4,<br>3      | 656,<br>3754      | 2 | 0,<br>1      |          |          | 7,98E+0<br>4 | 2,02E+0<br>5 |              | 7,64E+0<br>4 | 51               | F51:<br>167<br>0 | 2059             | 207<br>0                         |                                                                                                   |                  |                                                                                           |







|   |   |            |                                                      |   |           |                   |    |              |              |   |              |              |              |              |                  |                  |          |                                                                                                         |                                                                                                  |
|---|---|------------|------------------------------------------------------|---|-----------|-------------------|----|--------------|--------------|---|--------------|--------------|--------------|--------------|------------------|------------------|----------|---------------------------------------------------------------------------------------------------------|--------------------------------------------------------------------------------------------------|
| 3 | 4 | P027<br>51 | R.ISC(+15.99)TIANRRCHEGGQ(+.98)SY<br>K.I             | Y | 48,<br>38 | 1882<br>,830<br>2 | 17 | -<br>1,<br>2 | 942,<br>4213 | 2 | 2<br>4,<br>7 | 2,59E+05     | 1,59E+06     | 1,03E+<br>06 | 14               | F14:<br>207<br>2 | 133      | 149                                                                                                     | C3:Oxidati<br>on of<br>Hydroxylat<br>ion<br>(C):6.92;Q<br>14:Deamid<br>ation<br>(NQ):83.89       |
| 3 | 4 | P027<br>51 | R.LTVGLTR.R                                          | Y | 48,<br>15 | 758,<br>465       | 7  | -<br>0,<br>8 | 380,<br>2395 | 2 | 2<br>8,<br>8 | 0            | 0            | 0            | 23               | F23:<br>248<br>9 | 1029     | 103<br>5                                                                                                |                                                                                                  |
| 3 | 4 | P027<br>51 | F.DKYTGNTYR.V                                        | Y | 47,<br>86 | 1116<br>,52       | 9  | -<br>3,<br>4 | 559,<br>2654 | 2 | 1<br>8,<br>3 | 1,78E+05     | 0            | 0            | 14               | F14:<br>146<br>6 | 99       | 107                                                                                                     |                                                                                                  |
| 3 | 4 | P027<br>51 | R.GATY(-<br>2.02)N(+15.99)VIVEALKDQQR.H              | Y | 47,<br>63 | 1817<br>,927<br>1 | 16 | 13           | 909,<br>9828 | 2 | 3<br>4,<br>4 | 0            | 0            | 15           | F15:<br>301<br>3 | 2165             | 218<br>0 | Y4:2-<br>amino-3-<br>oxo-<br>butanoic_<br>acid:17.01;<br>N5:Oxidati<br>on or<br>Hydroxylat<br>ion:93.60 |                                                                                                  |
| 3 | 4 | P027<br>51 | T.GLQPGTDYK.I                                        | Y | 47,<br>57 | 977,<br>4818      | 9  | 0            | 489,<br>7482 | 2 | 2<br>6,<br>5 | 0            | 0            | 22           | F22:<br>222<br>4 | 1872             | 188<br>0 |                                                                                                         |                                                                                                  |
| 3 | 4 | P027<br>51 | R.TYLGNALVC(+31.99)TCYGG(-<br>2.02)R.G               | Y | 47,<br>39 | 1706<br>,739<br>3 | 16 | -<br>0,<br>9 | 854,<br>3762 | 2 | 3<br>3       | 0            | 0            | 2            | F2:2<br>693      | 68               | 83       | C9:Dihydro<br>xy:0.00;S1<br>5:2-amino-<br>3-oxo-<br>butanoic_<br>acid:0.00                              |                                                                                                  |
| 3 | 4 | P027<br>51 | R.QGQNGMMS(-<br>2.02)CTC(+31.99)LGNGK.G              | Y | 47,<br>01 | 1786<br>,674<br>3 | 17 | 9,<br>6      | 894,<br>353  | 2 | 2<br>9,<br>1 | 5,76E+0<br>5 | 2,47E+0<br>5 | 3,37E+0<br>5 | 44               | F44:<br>161<br>4 | 2267     | 228<br>3                                                                                                | S9:2-<br>amino-3-<br>oxo-<br>butanoic_<br>acid:11.50;<br>C12:Dihydr<br>oxy:35.36                 |
| 3 | 4 | P027<br>51 | R.TYLG.N.A                                           | Y | 46,<br>42 | 566,<br>27        | 5  | 5,<br>5      | 567,<br>2804 | 1 | 2<br>5,<br>1 | 8,98E+06     | 9,27E+06     | 2            | F2:2<br>025      | 68               | 72       |                                                                                                         |                                                                                                  |
| 3 | 4 | P027<br>51 | R.TYLGNALVC(-<br>33.99)TC(+47.98)YGGSR.G             | Y | 46,<br>19 | 1690<br>,762<br>1 | 16 | 0,<br>2      | 846,<br>3885 | 2 | 3<br>2,<br>4 | 5,27E+05     | 0            | 0            | 12               | F12:<br>264<br>1 | 68       | 83                                                                                                      | C9:Dehydr<br>oalanine<br>(C):13.67;C<br>11:Cystein<br>e<br>oxidation<br>to cysteic<br>acid:13.67 |
| 3 | 4 | P027<br>51 | R.EVVRPR.P                                           | Y | 45,<br>71 | 851,<br>4977      | 7  | 3            | 426,<br>7574 | 2 | 2<br>1,<br>5 | 0            | 0            | 4,96E+<br>04 | 22               | F22:<br>174<br>5 | 1946     | 195<br>2                                                                                                |                                                                                                  |
| 3 | 4 | P027<br>51 | R.HHPEHFSGRPR.E                                      | Y | 45,<br>22 | 1355<br>,659<br>5 | 11 | 0,<br>9      | 452,<br>8934 | 3 | 2,<br>1      | 0            | 2,02E+05     | 5            | F5:9<br>10       | 1392             | 140<br>2 |                                                                                                         |                                                                                                  |
| 3 | 4 | P027<br>51 | R.VGDTY(+31.99)ERPK.D                                | Y | 45,<br>16 | 1095<br>,519<br>7 | 9  | 0,<br>7      | 548,<br>7667 | 2 | 1<br>8,<br>1 | 0            | 1,10E+05     | 13           | F13:<br>143<br>5 | 108              | 116      | Y5:Dihydro<br>xy:0.00                                                                                   |                                                                                                  |
| 3 | 4 | P027<br>51 | K.IGDTW(+15.99)R.R                                   | Y | 45,<br>08 | 762,<br>366       | 6  | 5,<br>3      | 382,<br>1923 | 2 | 2<br>5,<br>7 | 5,69E+06     | 8,31E+06     | 2            | F2:2<br>080      | 150              | 155      | Oxidation<br>(HW)                                                                                       |                                                                                                  |
| 3 | 4 | P027<br>51 | R.GFN(-<br>33.99)ESKPI(+31.99)EAETCFDKYTYGN<br>TYR.V | Y | 45,<br>06 | 2786<br>,176<br>5 | 24 | -<br>2,<br>9 | 929,<br>7301 | 3 | 3<br>0,<br>5 | 1,99E+07     | 0            | 0            | 6                | F6:2<br>683      | 84       | 107                                                                                                     | C4:Dehydr<br>oalanine<br>(C):7.40;P8<br>:Dihydroxy<br>:0.00                                      |
| 3 | 4 | P027<br>51 | R.QGQNGMMSCT(-<br>2.02)C(+31.99)LGNGK.G              | Y | 44,<br>63 | 1786<br>,674<br>3 | 17 | 9,<br>4      | 894,<br>3528 | 2 | 2<br>8,<br>8 | 0            | 0            | 2,65E+0<br>5 | 36               | F36:<br>159<br>7 | 2267     | 228<br>3                                                                                                | T11:2-<br>amino-3-<br>oxo-<br>butanoic_<br>acid:9.40;C<br>12:Dihydro<br>xy:14.04                 |

|   |   |            |                                                   |   |           |                   |    |              |                   |                   |          |              |              |              |                  |                  |          |                                                                                                               |  |
|---|---|------------|---------------------------------------------------|---|-----------|-------------------|----|--------------|-------------------|-------------------|----------|--------------|--------------|--------------|------------------|------------------|----------|---------------------------------------------------------------------------------------------------------------|--|
| 3 | 4 | P027<br>51 | R.QYNVGSPSVK.Y                                    | Y | 44,<br>6  | 1077<br>,545<br>4 | 10 | 6,<br>3      | 539,<br>7834      | 2<br>6,<br>5      | 2,32E+06 | 1,19E+06     |              | 3            | F3:2<br>145      | 1041             | 105<br>0 |                                                                                                               |  |
| 3 | 4 | P027<br>51 | R.RPHETGGV(-<br>2.02)MLECV(+15.99)LGNGK.G         | Y | 44,<br>45 | 2076<br>,918      | 19 | 9,<br>3      | 1039<br>,476      | 2<br>3,<br>3      |          | 1,40E+0<br>6 |              | 40           | F40:<br>194<br>8 | 156              | 174      | Y8:2-<br>amino-3-<br>oxo-<br>butanoic_<br>acid:9.42;<br>C14:Oxidati<br>on or<br>Hydroxylat<br>ion<br>(C):0.00 |  |
| 3 | 4 | P027<br>51 | L.YTLNDNAR.S                                      | Y | 44,<br>28 | 965,<br>4567      | 8  | 7,<br>4      | 483,<br>7392      | 2<br>5,<br>2      |          | 1,01E+<br>06 |              | 21           | F21:<br>203<br>2 | 1884             | 189<br>1 |                                                                                                               |  |
| 3 | 4 | P027<br>51 | R.QGENGQMM(+31.99)SC(-<br>33.99)TC(+31.99)LGNGK.G | Y | 44,<br>13 | 1786<br>,692      | 17 | 0,<br>1      | 894,<br>3533      | 2<br>2<br>9       |          | 9,17E+0<br>4 | 3,43E+0<br>5 | 63           | F63:<br>162<br>0 | 2267             | 228<br>3 | M8:Dioxid<br>ation<br>(M):0.00;<br>C10:Dehydr<br>oalanine<br>(C):35.36;<br>C12:Dihydro<br>xy:35.36            |  |
| 3 | 4 | P027<br>51 | R.TYLGNAV(+15.99)T(-<br>2.02)CYGGSR.G             | Y | 43,<br>53 | 1690<br>,744<br>3 | 16 | 7,<br>9      | 846,<br>386       | 2<br>1,<br>9      | 4,74E+05 |              |              | 3            | F3:2<br>609      | 68               | 83       | C9:Oxidati<br>on or<br>Hydroxylat<br>ion<br>(C):0.00;<br>T10:2-amino-<br>3-oxo-<br>butanoic_<br>acid:11.10    |  |
| 3 | 4 | P027<br>51 | F.QQVAVPANGQTPQIR.T                               | Y | 43,<br>4  | 1592<br>,827      | 15 | -<br>1,<br>3 | 797,<br>4197      | 2<br>8,<br>8      | 0        | 0            | 0            | 13           | F13:<br>244<br>5 | 1845             | 185<br>9 |                                                                                                               |  |
| 3 | 4 | P027<br>51 | R.GFNCS(-<br>2.02)KPEAETCFDKYTGNTYR.V             | Y | 43,<br>05 | 2786<br>,158<br>7 | 24 | 1,<br>9      | 929,<br>7286      | 3<br>0,<br>6      | 1,89E+07 | 1,40E+07     |              | 13           | F13:<br>261<br>6 | 84               | 107      | S6:2-<br>amino-3-<br>oxo-<br>butanoic_<br>acid:1.11                                                           |  |
| 3 | 4 | P027<br>51 | K.PYQGW(+31.99)MVDCT(-<br>2.02)CLGEGSR.I          | Y | 42,<br>67 | 2118<br>,826<br>7 | 19 | 8,<br>2      | 1060<br>,429<br>3 | 2<br>3<br>5,<br>4 |          |              | 6,83E+0<br>5 | 66           | F66:<br>213<br>9 | 204              | 222      | M6:Dioxid<br>ation<br>(M):0.00;<br>T11:2-<br>amino-3-<br>oxo-<br>butanoic_<br>acid:41.57                      |  |
| 3 | 4 | P027<br>51 | R.VGDTYERP(+31.99)K.D                             | Y | 42,<br>51 | 1095<br>,519<br>7 | 9  | -<br>3,<br>8 | 548,<br>765       | 2<br>7,<br>6      |          | 9,38E+04     |              | 15           | F15:<br>140<br>9 | 108              | 116      | P8:Dihydr<br>oxy:0.00                                                                                         |  |
| 3 | 4 | P027<br>51 | R.QAQMVQPQSPVAVSQSK.P                             | Y | 42,<br>5  | 1939<br>,978<br>5 | 18 | -<br>15      | 970,<br>9824      | 2<br>2,<br>5      |          |              | 1,16E+0<br>6 | 1,12E+0<br>6 | 70               | F70:<br>188<br>0 | 32       | 49                                                                                                            |  |
| 3 | 4 | P027<br>51 | K.IGDTW(+31.99)R.R                                | Y | 42,<br>14 | 778,<br>361       | 6  | 5,<br>5      | 390,<br>1899      | 2<br>2<br>3       | 3,21E+05 | 1,47E+06     | 0            | 2            | F2:1<br>846      | 150              | 155      | W5:Dihydr<br>oxy:16.90                                                                                        |  |
| 3 | 4 | P027<br>51 | R.TEIDKPSQM(+98)TVDVQDNSISVK<br>.W                | Y | 41,<br>71 | 2462<br>,184<br>6 | 22 | 4,<br>9      | 821,<br>7395      | 3<br>3<br>1       |          | 0            |              | 14           | F14:<br>267<br>5 | 1540             | 156<br>1 | Q10:Deam<br>idation<br>(NQ):9.40                                                                              |  |
| 3 | 4 | P027<br>51 | R.TYLGNAV(+31.99)T(-<br>2.02)CYGGSR.G             | Y | 41,<br>23 | 1706<br>,739<br>3 | 16 | -<br>8,<br>2 | 854,<br>3699      | 2<br>3,<br>8      |          | 0            | 1,77E+<br>06 | 13           | F13:<br>290<br>9 | 68               | 83       | C9:Dihydro<br>xy:0.00;<br>T10:2-amino-<br>3-oxo-<br>butanoic_<br>acid:3.92                                    |  |
| 3 | 4 | P027<br>51 | Q.STVSDVPR.D                                      | Y | 41,<br>19 | 859,<br>4399      | 8  | 8,<br>1      | 430,<br>7307      | 2<br>4,<br>7      |          | 0            |              | 23           | F23:<br>208<br>2 | 1445             | 145<br>2 |                                                                                                               |  |
| 3 | 4 | P027<br>51 | K.HYQINQQWE.R                                     | Y | 40,<br>98 | 1244<br>,557<br>4 | 9  | 1,<br>8      | 623,<br>2871      | 2<br>1,<br>4      | 1,49E+06 | 1,67E+06     |              | 10           | F10:<br>258<br>9 | 58               | 66       |                                                                                                               |  |
| 3 | 4 | P027<br>51 | K.FGFC(+15.99)PMAAHEICTTNEG<br>V<br>MYR.J         | Y | 40,<br>69 | 2521<br>,053      | 22 | 8            | 841,<br>3651      | 3<br>3<br>5,      | 1,40E+06 | 1,26E+06     |              | 18           | F18:<br>211      | 458              | 479      | C4:Oxidati<br>on or                                                                                           |  |

|   |   |            |                                              |   |           |                   |    |              |              |   |               |          |          |              |   |   |                  |      |          |                                                                                                                 |
|---|---|------------|----------------------------------------------|---|-----------|-------------------|----|--------------|--------------|---|---------------|----------|----------|--------------|---|---|------------------|------|----------|-----------------------------------------------------------------------------------------------------------------|
|   |   |            |                                              |   | 5         |                   |    |              | 5            |   |               |          |          |              |   | 9 |                  |      |          | Hydroxylat<br>ion<br>(C):11.94                                                                                  |
| 3 | 4 | P027<br>51 | K.TGPMK.E                                    | Y | 40,<br>45 | 532,<br>2679      | 5  | -<br>5,<br>1 | 533,<br>2725 | 1 | 1,<br>1,<br>6 |          |          |              | 0 |   | F23:<br>843      | 1762 | 176<br>6 |                                                                                                                 |
| 3 | 4 | P027<br>51 | R.HTSVQTT.S                                  | Y | 40,<br>33 | 859,<br>4036      | 8  | 2,<br>1      | 860,<br>4127 | 1 | 1,<br>1,<br>9 | 7,95E+05 | 4,03E+05 | 1,72E+<br>05 |   |   | F13:<br>843      | 273  | 280      |                                                                                                                 |
| 3 | 4 | P027<br>51 | R.ISC(+31.99)T(-2.02)IANR.C                  | Y | 39,<br>36 | 906,<br>4229      | 8  | 6,<br>6      | 454,<br>2217 | 2 | 2<br>5,<br>4  | 3,89E+05 |          |              |   |   | F2:2<br>050      | 133  | 140      | C3:Dihydro<br>xy:40.91;T<br>4:2-amino-<br>3-oxo-<br>butanoic_<br>acid:26.31                                     |
| 3 | 4 | P027<br>51 | R.TYLGNALVCT(-<br>2.02)C(+31.99)YGGSR.G      | Y | 38,<br>84 | 1706<br>,739<br>3 | 16 | -<br>4,<br>3 | 854,<br>3732 | 2 | 3<br>2,<br>9  | 3,67E+05 |          | 0            |   |   | F3:2<br>697      | 68   | 83       | T10:2-<br>amino-3-<br>oxo-<br>butanoic_<br>acid:0.00;C<br>11:Dihydro<br>xy:0.00                                 |
| 3 | 4 | P027<br>51 | R.GNLLQC(+15.99)CT(-2.02)GNR.G               | Y | 38,<br>35 | 1361<br>,618      | 13 | 8            | 681,<br>8217 | 2 | 3<br>0,<br>6  | 7,84E+05 |          |              |   |   | F3:2<br>497      | 253  | 265      | C6:Oxidati<br>on or<br>Hydroxylat<br>ion<br>(C):0.00;T9<br>:2-amino-<br>3-oxo-<br>butanoic_<br>acid:1000.<br>00 |
| 3 | 4 | P027<br>51 | K.FGF(+31.99)PMAAHEEIC(-<br>33.99)TNEGVMYR.I | Y | 37,<br>92 | 2503<br>,060<br>5 | 22 | 3,<br>2      | 835,<br>3635 | 3 | 3<br>4,<br>5  |          |          | 0            |   |   | F13:<br>297<br>0 | 458  | 479      | C4:Dihydro<br>xy:0.00;C1<br>3:Dehydro<br>alanine<br>(C):0.00                                                    |
| 3 | 4 | P027<br>51 | R.GN(+.98)LLQC(-<br>33.99)C(+31.99)TGNGR.G   | Y | 37,<br>55 | 1346<br>,624<br>9 | 13 | -<br>0,<br>2 | 674,<br>3196 | 2 | 3<br>1,<br>8  |          |          | 0            |   |   | F6:2<br>799      | 253  | 265      | N2:Deami<br>dation<br>(NQ):47.09<br>;C6:Dehydr<br>oalanine<br>(C):14.04;C<br>8:Dihydrox<br>y:14.04              |
| 3 | 4 | P027<br>51 | K.C(+27.99)DP(-<br>30.01)HEATCYDDGK.T        | Y | 37,<br>48 | 1450<br>,512<br>9 | 13 | 6,<br>8      | 484,<br>5149 | 3 | 2<br>4,<br>4  | 5,74E+05 |          |              |   |   | F3:1<br>966      | 2288 | 230<br>0 | C1:Formyl<br>ation:54.4<br>0;F3:Prote<br>in<br>oxidation<br>to<br>pyrrolidino<br>ne:1000.00                     |
| 3 | 4 | P027<br>51 | R.CT(-2.02)CVGNR.G                           | Y | 37,<br>24 | 806,<br>3163      | 8  | 1,<br>6      | 807,<br>3249 | 1 | 1<br>3,<br>9  | 9,42E+05 | 0        | 0            |   |   | F5:1<br>087      | 496  | 503      | 2-amino-<br>3-oxo-<br>butanoic_<br>acid<br>1000.<br>00                                                          |
| 3 | 4 | P027<br>51 | K.HYQIN.Q                                    | Y | 37,<br>19 | 673,<br>3184      | 5  | 1,<br>1      | 674,<br>3264 | 1 | 1<br>7,<br>3  | 1,28E+06 | 1,19E+06 | 1,59E+<br>05 |   |   | F14:<br>137<br>4 | 58   | 62       |                                                                                                                 |
| 3 | 4 | P027<br>51 | K.GLK(+27.99)PGVVYE.G                        | Y | 37,<br>15 | 988,<br>5229      | 9  | 14           | 495,<br>2754 | 2 | 3<br>0,<br>8  |          |          | 1,25E+<br>06 |   |   | F19:<br>263<br>0 | 670  | 678      | K3:Formyl<br>ation:8.22                                                                                         |
| 3 | 4 | P027<br>51 | R.VGDYERPK(+31.99).D                         | Y | 36,<br>62 | 1095<br>,519<br>7 | 9  | -<br>4,<br>3 | 366,<br>1789 | 3 | 1<br>7,<br>3  |          | 1,49E+05 |              |   |   | F15:<br>138<br>0 | 108  | 116      | K9:Dihydr<br>oxy:0.00                                                                                           |
| 3 | 4 | P027<br>51 | K.IGDTW(+13.98)R.R                           | Y | 36,<br>13 | 760,<br>3504      | 6  | 5,<br>3      | 381,<br>1845 | 2 | 2<br>7,<br>3  | 6,10E+05 | 1,01E+06 | 0            |   |   | F3:2<br>217      | 150  | 155      | Tryptopha<br>n<br>oxidation<br>to<br>oxolactone<br>:1000.00                                                     |
| 3 | 4 | P027       | R.WTPPR.A                                    | Y | 35,       | 655,              | 5  | -            | 328,         | 2 | 2             | 4,12E+05 | 0        | 4,44E+       |   |   | F6:2             | 1017 | 102      |                                                                                                                 |



|   |   |        |                                               |   |       |           |    |     |           |   |       |          |          |          | (C):1000.00 |      |                                                                 |                                                       |     |                                                                          |
|---|---|--------|-----------------------------------------------|---|-------|-----------|----|-----|-----------|---|-------|----------|----------|----------|-------------|------|-----------------------------------------------------------------|-------------------------------------------------------|-----|--------------------------------------------------------------------------|
| 3 | 4 | P02751 | R.VDVIPVNLPGEHGQR.L                           | Y | 32,75 | 1628,8634 | 15 | 6,9 | 543,9655  | 3 | 3,1,9 | 3,00E+05 | 2        | F2:2602  | 939         | 953  |                                                                 |                                                       |     |                                                                          |
| 3 | 4 | P02751 | R.TYLGNAL.V                                   | Y | 32,66 | 750,3912  | 7  | 8,7 | 751,405   | 1 | 0,0,9 | 0        | 20       | F20:2550 | 68          | 74   |                                                                 |                                                       |     |                                                                          |
| 3 | 4 | P02751 | D.TYERPK.D                                    | Y | 32,65 | 792,413   | 6  | 0,3 | 793,4205  | 1 | 2,0,2 | 1,22E+05 | 4        | F4:1677  | 111         | 116  |                                                                 |                                                       |     |                                                                          |
| 3 | 4 | P02751 | K.HYQINQ(+.98).Q                              | Y | 31,86 | 802,361   | 6  | 0,3 | 803,368   | 1 | 2,3,7 | 0        | 24       | F24:1968 | 58          | 63   | Q6:Deamidation(NQ):17.01                                        |                                                       |     |                                                                          |
| 3 | 4 | P02751 | K.FGFQCP(+13.98)MAAHEICTTNEGVM(+15.99)YR.I    | Y | 31,35 | 2535,0327 | 22 | 6,4 | 846,0236  | 3 | 3,5,3 | 5,39E+06 | 0        | 3,09E+06 | 0           | 29   | F29:2136                                                        | 458                                                   | 479 | P5:Proline oxidation to pyroglutamic acid:1000.00;M20:Oxidation(M):51.01 |
| 3 | 4 | P02751 | R.QGEGQMM(+31.99)SCT(-2.02)CLGNKG.G           | Y | 31,02 | 1786,6743 | 17 | 9   | 894,3525  | 2 | 2,9,2 | 1,30E+05 | 42       | F42:1609 | 2267        | 2283 | M8:Dioxidation(M):0.00;T11:2-amino-3-oxo-butanoic_acid:14.04    |                                                       |     |                                                                          |
| 3 | 4 | P02751 | R.IGDT(-2.02)WSK.K                            | Y | 30,65 | 803,3813  | 7  | 5,3 | 402,7001  | 2 | 2,6,2 | 5,30E+05 | 11       | F11:2105 | 242         | 248  | T4:2-amino-3-oxo-butanoic_acid:32.28                            |                                                       |     |                                                                          |
| 3 | 4 | P02751 | K.HYQINQ.Q                                    | Y | 30,63 | 801,377   | 6  | 1,1 | 802,3834  | 1 | 2,1,3 | 0        | 4        | F4:1780  | 58          | 63   |                                                                 |                                                       |     |                                                                          |
| 3 | 4 | P02751 | R.TIKP(+31.99)DVR.S                           | Y | 30,35 | 859,4763  | 7  | 3,2 | 430,744   | 2 | 1,8,8 | 0        | 6        | F6:1563  | 1860        | 1866 | P4:Dihydroxy:0.00                                               |                                                       |     |                                                                          |
| 3 | 4 | P02751 | R.VEYELSEEGDEPQYLDLPSTATSVNIPDLLPGRK(-1.03).Y | Y | 29,86 | 3772,8206 | 34 | 7,4 | 1258,6234 | 3 | 5,0,4 | 2,75E+04 | 38       | F38:3187 | 752         | 785  | K34:Lysine oxidation to aminoaldehyde:1000.00                   |                                                       |     |                                                                          |
| 3 | 4 | P02751 | R.ISCTIANRC(+15.99)HEGGQ(+.98)SYK.I           | Y | 29,67 | 1882,8302 | 17 | 0,6 | 628,6169  | 3 | 2,4,6 | 0        | 23       | F23:2072 | 133         | 149  | C9:Oxidation or Hydroxylation(C):0.00;Q14:Deamidation(NQ):34.75 |                                                       |     |                                                                          |
| 3 | 4 | P02751 | T.NFLVR.Y                                     | N | 29,61 | 647,3755  | 5  | 2   | 648,384   | 1 | 0,0,7 | 7,54E+06 | 19       | F19:2617 | 1297        | 1301 |                                                                 |                                                       |     |                                                                          |
| 3 | 4 | P02751 | G.DTYERPK.D                                   | Y | 29,44 | 907,4399  | 7  | 1,8 | 454,7264  | 2 | 2,6,1 | 1,69E+04 | 31       | F31:1425 | 110         | 116  |                                                                 |                                                       |     |                                                                          |
| 3 | 4 | P02751 | S.TTSN(+.98)YEQDQKYSFC(-33.99)TDHTVLVQTR.G    | Y | 29,08 | 2830,3047 | 24 | 4,2 | 944,4382  | 3 | 3,3,9 | 2,64E+06 | 1,60E+06 | 51       | F51:1969    | 388  | 411                                                             | N4:Deamidation(NQ):0.00;C14:Dehydroalanine(C):1000.00 |     |                                                                          |
| 3 | 4 | P02751 | R.QGEGQM(+15.99)MSC(+47.98)TC(-33.99)LGNGK.G  | Y | 28,74 | 1786,692  | 17 | 1,6 | 894,3547  | 2 | 2,9,2 | 1,79E+05 | 71       | F71:1618 | 2267        | 2283 | M7:Oxidation(M):17.01;                                          |                                                       |     |                                                                          |

|   |   |        |                                            |   |       |           |    |     |           |   |      |          |    |          |      |      |                                        |                                                                                                         |
|---|---|--------|--------------------------------------------|---|-------|-----------|----|-----|-----------|---|------|----------|----|----------|------|------|----------------------------------------|---------------------------------------------------------------------------------------------------------|
| 3 | 4 | P02751 | L.TR(+31.99)GATY(+44.99)NVIVEALKDQQR.H     | Y | 28,73 | 2138,0715 | 18 | 1,3 | 713,6987  | 3 | 34,3 | 2,69E+06 | 22 | F22:2979 | 2163 | 2180 | Oxidation to nitro                     | C10:Cysteine oxidation to cysteic acid:0.00;C12:Dehydroalanine (C):0.00                                 |
| 3 | 4 | P02751 | K.FGFCPMAAHEEIC(+15.99)TTNEGVMYR.I         | Y | 28,4  | 2521,0535 | 22 | 14  | 841,3702  | 3 | 35,1 | 0        | 9  | F9:2103  | 458  | 479  |                                        | C13:Oxidation or Hydroxylation (C):0.00                                                                 |
| 3 | 4 | P02751 | R.QGENGQM(+31.99)MSCT(-2.02)CLGNGK.G       | Y | 28,28 | 1786,6743 | 17 | 9,2 | 894,3527  | 2 | 29,1 | 1,75E+05 | 65 | F65:1621 | 2267 | 2283 |                                        | M7:Dioxidation (M):0.00;T11:2-amino-3-oxo-butanoic_acid:14.04                                           |
| 3 | 4 | P02751 | R.QGEN(+98)GQMMS(-2.02)CTC(+31.99)LGNGK.G  | Y | 27,87 | 1787,6583 | 17 | 10  | 894,8458  | 2 | 29,2 | 1,25E+05 | 39 | F39:1641 | 2267 | 2283 |                                        | N4:Deamidation (NQ):18.00;S9:2-amino-3-oxo-butanoic_acid:12.81;C12:Dihydroxy:12.81                      |
| 3 | 4 | P02751 | K.FGFCP(+13.98)MAAHEEICTTNEGVMYR(+15.99).I | Y | 27,78 | 2535,0327 | 22 | 10  | 1268,5365 | 2 | 35,5 | 0        | 39 | F39:2162 | 458  | 479  | Proline oxidation to pyroglutamic acid | P5:Proline oxidation to pyroglutamic acid:1000.00;R22:Oxidation or Hydroxylation:0.00                   |
| 3 | 4 | P02751 | K.PYQGWMM(+31.99)VDCT(-2.02)CLGEGSGR.I     | Y | 27,66 | 2118,8267 | 19 | 9   | 1060,4302 | 2 | 35,4 | 0        | 64 | F64:2145 | 204  | 222  |                                        | M7:Dioxidation (M):0.00;T11:2-amino-3-oxo-butanoic_acid:19.69                                           |
| 3 | 4 | P02751 | R.GNLLQC(+15.99)IC(-33.99)TGN(+15.99)GR.G  | Y | 27,58 | 1345,6409 | 13 | 6,3 | 673,8235  | 2 | 4,6  | 6,82E+05 | 80 | F80:2064 | 253  | 265  |                                        | C6:Oxidation or Hydroxylation (C):13.67;C8:Dehydroalanine (C):13.67;N11:Oxidation or Hydroxylation:5.03 |
| 3 | 4 | P02751 | K.HYQINQQW(+13.98).E                       | Y | 27,43 | 1129,4941 | 8  | 7,3 | 565,7585  | 2 | 8,6  | 5,74E+05 | 11 | F11:2307 | 58   | 65   | Tryptophan oxidation to oxolactone     | W8:Tryptophan oxidation to oxolactone:1000.00                                                           |
| 3 | 4 | P02751 | R.GFNCES(-2.02)KPEAEETCFDK.Y               | Y | 27,36 | 1930,771  | 17 | 4,9 | 966,3976  | 2 | 3,1  | 5,05E+07 | 8  | F8:1784  | 84   | 100  |                                        | S6:2-amino-3-                                                                                           |









|   |   |        |                                        |   |       |           |    |      |           |   |      |          |          |          |          |          |    |                                                  |                                                                                   |                                              |
|---|---|--------|----------------------------------------|---|-------|-----------|----|------|-----------|---|------|----------|----------|----------|----------|----------|----|--------------------------------------------------|-----------------------------------------------------------------------------------|----------------------------------------------|
|   |   |        |                                        |   |       |           |    |      |           |   |      |          |          |          |          |          |    |                                                  | (M)                                                                               | :Oxidation (M):1000.00                       |
| 2 | 3 | P05160 | K.SFY(+33.96)FPM(+15.99)SIDKK.L        | Y | 52,72 | 1411,6249 | 11 | 5,3  | 706,8234  | 2 | 35,3 | 3,99E+05 |          | 50       | F50:2090 | 44       | 54 | Chlorination of tyrosine residues; Oxidation (M) | Y3:Chlorination of tyrosine residues:1000.00;M6:Oxidation (M):1000.00             |                                              |
| 2 | 3 | P05160 | K.SFY(+33.96)FPM(+15.99)SIDK.K         | Y | 48,82 | 1283,5299 | 10 | 5,7  | 642,7759  | 2 | 36,7 |          | 8,33E+06 | 80       | F80:2244 | 44       | 53 | Chlorination of tyrosine residues; Oxidation (M) | Y3:Chlorination of tyrosine residues:1000.00;M6:Oxidation (M):1000.00             |                                              |
| 2 | 3 | P05160 | K.SFY(+33.96)FP(+15.99)MSIDK.K         | Y | 48,74 | 1283,5299 | 10 | 6,1  | 642,7761  | 2 | 37   |          | 3,75E+06 | 78       | F78:2188 | 44       | 53 | Chlorination of tyrosine residues                | Y3:Chlorination of tyrosine residues:1000.00;P5:Oxidation or Hydroxylat ion:20.54 |                                              |
| 2 | 3 | P05160 | K.SFY(+67.92)FPMSIDK.K                 | Y | 48,56 | 1301,496  | 10 | 6,3  | 651,7593  | 2 | 39,7 |          | 1,66E+05 | 78       | F78:2401 | 44       | 53 | Dichlorination of tyrosine residues              | Y3:Dichlorination of tyrosine residues:1000.00                                    |                                              |
| 2 | 3 | P05160 | K.SFYFP(+31.99)MSIDK.K                 | Y | 44,28 | 1265,5638 | 10 | 6,8  | 633,7935  | 2 | 32,6 | 4,03E+05 | 2,83E+06 | 20       | F20:2700 | 44       | 53 |                                                  | P5:Dihydroxy:4.75                                                                 |                                              |
| 2 | 3 | P05160 | K.SFY(+33.96)FPMSIDK.K                 | Y | 43,9  | 1267,535  | 10 | 5,3  | 634,7781  | 2 | 38,7 | 0,00E+00 |          | 1,64E+06 | 77       | F77:2416 | 44 | 53                                               | Chlorination of tyrosine residues                                                 | Y3:Chlorination of tyrosine residues:1000.00 |
| 2 | 3 | P05160 | K.SFYFPMSIDK(+15.99).K                 | Y | 42,85 | 1249,5688 | 10 | 5    | 625,7948  | 2 | 53   | 1,05E+04 |          | 0,00E+00 | 40       | F40:3497 | 44 | 53                                               |                                                                                   | K10:Oxidation or Hydroxylat ion:0.00         |
| 2 | 3 | P05160 | K.SFYFPMSIDK                           | Y | 42,26 | 1105,479  | 9  | -2,7 | 1106,4833 | 1 | 38,6 | 2,72E+06 | 1,99E+06 | 5        | F5:3403  | 44       | 52 |                                                  |                                                                                   |                                              |
| 2 | 3 | P05160 | K.SFYFPM.S                             | Y | 39,85 | 790,336   | 6  | 0,4  | 791,3436  | 1 | 36,9 | 2,29E+07 | 9,08E+06 | 1,19E+07 | 6        | F6:3251  | 44 | 49                                               |                                                                                   |                                              |
| 2 | 3 | P05160 | K.SFYFP.M                              | Y | 37,01 | 659,2955  | 5  | -1   | 660,3021  | 1 | 48   |          | 2,70E+06 | 24       | F24:3037 | 44       | 48 |                                                  |                                                                                   |                                              |
| 2 | 3 | P05160 | K.SFYFP(+31.99)M(-48.00)SID(+15.99)K.K | Y | 36,98 | 1233,5553 | 10 | 6,5  | 617,7889  | 2 | 56,7 | 0,00E+00 |          | 44       | F44:3597 | 44       | 53 | Dethiomethyl                                     | P5:Dihydroxy:0.00;M6:Dethiomethyl:1000.00;D9:Oxidation or Hydroxylat ion:0.00     |                                              |
| 2 | 3 | P05160 | K.SFYFPM(+31.99)SIDK.K                 | Y | 35,04 | 1265,5638 | 10 | 7,3  | 633,7938  | 2 | 38,8 | 4,96E+05 |          | 11       | F11:2670 | 44       | 53 | Dioxidation (M)                                  | M6:Dioxidation (M):1000.00                                                        |                                              |
| 2 | 3 | P05160 | S.FYFPM.SIDK.K                         | Y | 39,98 | 1146,542  | 9  | 5,8  | 574,2816  | 2 | 37,9 | 1,20E+06 | 1,96E+06 | 3,97E+05 | 43       | F43:2337 | 45 | 53                                               |                                                                                   |                                              |
| 2 | 3 | P05160 | S.FYFPM(+15.99)SIDK.K                  | Y | 38,5  | 1162,5369 | 9  | 6,5  | 582,2795  | 2 | 35,8 | 1,15E+06 |          | 51       | F51:2133 | 45       | 53 | Oxidation (M)                                    | M5:Oxidation (M):1000.00                                                          |                                              |

|   |   |        |                                              |   |       |           |    |     |          |          |   |     |          |          |          |          |          |          |          |          |                                                 |                                                                                                     |                                                                                 |    |                                         |
|---|---|--------|----------------------------------------------|---|-------|-----------|----|-----|----------|----------|---|-----|----------|----------|----------|----------|----------|----------|----------|----------|-------------------------------------------------|-----------------------------------------------------------------------------------------------------|---------------------------------------------------------------------------------|----|-----------------------------------------|
| 2 | 3 | P05160 | F.YFPMSIDKK.L                                | Y | 50,21 | 1127,5685 | 9  | -   | 0,8      | 564,7911 | 2 | 2   | 9,5      | 1,76E+06 |          |          |          |          | 24       | F24:2536 | 46                                              | 54                                                                                                  |                                                                                 |    |                                         |
| 2 | 3 | P05160 | F.YFPM(+15.99)SIDK.K                         | Y | 45,26 | 1015,4684 | 8  | 5,9 | 508,7445 | 2        | 3 | 5,7 | 1,21E+06 | 6,25E+06 | 2,21E+06 | 9,83E+06 | 77       | F77:2164 | 46       | 53       | Oxidation (M)                                   | M4:Oxidation (M):1000.00                                                                            |                                                                                 |    |                                         |
| 2 | 3 | P05160 | F.YFPMSIDK.K                                 | Y | 43,7  | 999,4735  | 8  | 5,1 | 500,7466 | 2        | 3 | 8,1 | 5,12E+06 |          | 1,35E+06 | 5,94E+05 | 78       | F78:2284 | 46       | 53       |                                                 |                                                                                                     |                                                                                 |    |                                         |
| 2 | 3 | P05160 | Y.FPMSIDKK.L                                 | Y | 50,52 | 964,5051  | 8  | 2,3 | 483,2609 | 2        | 3 | 0,5 | 1,40E+06 |          |          |          | 10       | F10:2500 | 47       | 54       |                                                 |                                                                                                     |                                                                                 |    |                                         |
| 2 | 3 | P05160 | Y.FPMSIDK.K                                  | Y | 48,38 | 836,4102  | 7  | 2,2 | 419,2133 | 2        | 3 | 2,3 | 9,67E+05 | 3,24E+06 |          |          | 1        | F1:2685  | 47       | 53       |                                                 |                                                                                                     |                                                                                 |    |                                         |
| 2 | 3 | P05160 | P.MSIDKK.L                                   | Y | 36,53 | 720,384   | 6  | 0,5 | 361,1994 | 2        | 3 | 3,4 | 9,15E+05 | 0,00E+00 | 0,00E+00 |          | 5        | F5:1032  | 49       | 54       |                                                 |                                                                                                     |                                                                                 |    |                                         |
| 2 | 3 | P05160 | S.JDKKLSFFC(+31.99)LAGYTTESGR.Q              | Y | 36,1  | 2167,062  | 19 | -   | 1,2      | 1084,537 | 2 | 3   | 6,7      | 8,25E+05 |          |          | 26       | F26:2237 | 51       | 69       |                                                 | C9:Dihydroxy:12.28                                                                                  |                                                                                 |    |                                         |
| 2 | 3 | P05160 | K.K(+42.01)LS(+79.97)FFC(+15.99)LAGYTTESGR.Q | Y | 49,18 | 1916,8379 | 16 | 4,4 | 959,4304 | 2        | 3 | 9,2 |          | 0,00E+00 |          |          | 51       | F51:2410 | 54       | 69       | Acetylation (K); Oxidation or Hydroxylation (C) | K1:Acetylation (K):1000.00;S3:Phosphorylation (STY):43.57;C6:Oxidation or Hydroxylation (C):1000.00 |                                                                                 |    |                                         |
| 2 | 3 | P05160 | K.LSFFCLAGYTTESGR.Q                          | Y | 75,48 | 1650,7711 | 15 | 7,6 | 826,3991 | 2        | 4 | 1,6 |          |          |          | 2,28E+05 | 78       | F78:2539 | 55       | 69       |                                                 |                                                                                                     |                                                                                 |    |                                         |
| 2 | 3 | P05160 | K.LS(-2.02)FFCLAGYTTESGR.Q                   | Y | 63,5  | 1648,7555 | 15 | 7,5 | 825,3912 | 2        | 4 | 7,1 | 3,57E+05 | 2,29E+04 | 9,31E+05 | 5,94E+05 | 2,96E+05 | 9,29E+05 | 6,36E+05 | 6,31E+05 | 74                                              | F74:3014                                                                                            | 55                                                                              | 69 | S2:2-amino-3-oxo-butanoinic_acid:34.57  |
| 2 | 3 | P05160 | K.LSFFCLAGY(+15.99)TTESGRQEEQTTCTTEGWSPEPR.C | Y | 51,33 | 3626,593  | 32 | 5,9 | 907,6609 | 4        | 3 | 7,4 | 5,49E+07 | 3,43E+07 | 3,43E+07 | 6,17E+06 | 8,36E+07 | 1,38E+07 | 54       | F54:2303 | 55                                              | 86                                                                                                  | Y9:Oxidation or Hydroxylation:5.14                                              |    |                                         |
| 2 | 3 | P05160 | K.LSFF(+31.99)C(-33.99)LAGYTTESGR.Q          | Y | 48,42 | 1648,7733 | 15 | -   | 5,5      | 825,3894 | 2 | 4   | 7        |          | 3,27E+04 | 8,43E+04 | 7,01E+04 | 68       | F68:2969 | 55       | 69                                              | Dehydroalanine (C)                                                                                  | F4:Dihydroxy:12.60;C5:Dehydroalanine (C):1000.00                                |    |                                         |
| 2 | 3 | P05160 | K.LSFFCLAGYTTESGR(+15.99)QEEQTTCTTEGWSPEPR.C | Y | 46,01 | 3626,593  | 32 | 7,4 | 907,6622 | 4        | 3 | 7,4 | 6,36E+07 | 2,11E+07 | 4,37E+07 | 1,04E+08 | 3,38E+07 | 2,13E+07 | 40       | F40:2295 | 55                                              | 86                                                                                                  | R15:Oxidation or Hydroxylation:2.81                                             |    |                                         |
| 2 | 3 | P05160 | K.LS(-2.02)FFC(+15.99)LAGYTTESGR.Q           | Y | 45,22 | 1664,7504 | 15 | 2,6 | 833,3846 | 2        | 3 | 7,5 | 1,73E+05 | 1,46E+05 |          |          |          | 11       | F11:3035 | 55       | 69                                              | Oxidation or Hydroxylation (C)                                                                      | S2:2-amino-3-oxo-butanoinic_acid:0.00;C5:Oxidation or Hydroxylation (C):1000.00 |    |                                         |
| 2 | 3 | P05160 | K.LSFFCLAGYTTESGRQEEQTTCTTEGWSPEPR.C         | Y | 45,13 | 3626,593  | 32 | 1   | 907,6564 | 4        | 3 | 5,1 | 5,96E+07 | 2,39E+07 | 7,35E+07 | 4,36E+07 | 6,46E+07 | 7,12E+06 | 4,97E+07 | 2,72E+06 | 4                                               | F4:3094                                                                                             | 55                                                                              | 86 | C22:Oxidation or Hydroxylation (C):5.38 |
| 2 | 3 | P05160 | K.LSFFC(+15.99)LAGYTTESGRQEEQTTCTTEGWSPEPR.C | Y | 43,63 | 3626,593  | 32 | 6,4 | 907,6614 | 4        | 3 | 7,7 | 2,49E+07 | 3,60E+07 | 3,27E+07 | 3,09E+06 | 2,86E+07 | 64       | F64:230  | 55       | 86                                              | C5:Oxidation or                                                                                     |                                                                                 |    |                                         |





|   |   |        |                                                 |   |       |           |    |      |           |   |       |          |          |          |          |          |          |          |          |     |                                                                                    |                                                                                             |
|---|---|--------|-------------------------------------------------|---|-------|-----------|----|------|-----------|---|-------|----------|----------|----------|----------|----------|----------|----------|----------|-----|------------------------------------------------------------------------------------|---------------------------------------------------------------------------------------------|
| 2 | 3 | P05160 | R.C(-33.99)FK(+43.99)KCTKPDLSNGYISDVK.L         | Y | 61,46 | 2155,062  | 19 | 12   | 1078,5509 | 2 | 2,4   | 4,68E+06 | 5,46E+05 | 3,66E+05 | 3,30E+06 | 2,87E+05 | 44       | F44:1873 | 87       | 105 | C1:Dehydration(C):0.00;K3:Carboxylation(DKW):8.69                                  |                                                                                             |
| 2 | 3 | P05160 | R.CFK(+43.99)K(-33.99)TKPDLSNGYISDVK.L          | Y | 59,98 | 2155,062  | 19 | 10   | 719,3687  | 3 | 3,2,2 | 0,00E+00 | 3,02E+06 | 6,01E+06 | 7,04E+06 | 1,04E+06 | 8,94E+05 | 38       | F38:1870 | 87  | 105                                                                                | K3:Carboxylation(DKW):0.00;C5:Dehydroalanine(C):4.08                                        |
| 2 | 3 | P05160 | R.CFKKCT(-2.02)KPDLSN(+.98)GYISDVK.L            | Y | 57,99 | 2144,0281 | 19 | 14   | 1073,0358 | 2 | 3,1,6 |          |          | 7,61E+05 | 4,65E+03 | 1,15E+05 | 69       | F69:1792 | 87       | 105 | Deamidation(NQ)                                                                    |                                                                                             |
| 2 | 3 | P05160 | R.CFK(+42.01)K(+14.96)CT(-2.02)KPDLSNGYISDVK.L  | Y | 57,39 | 2200,0181 | 19 | 5,7  | 1101,0226 | 2 | 3,0,9 | 4,10E+06 |          | 1,13E+06 | 4,81E+05 | 2,05E+06 | 1,35E+06 | 43       | F43:1753 | 87  | 105                                                                                | K3:Acetylation(K):0.00;K4:Alpha-amino adipic acid:0.00;T6:2-amino-3-oxo-butanoic acid:65.71 |
| 2 | 3 | P05160 | R.C(+43.01)FKK(-1.03)CTKPDLSNGYISDVK.L          | Y | 52,47 | 2187,0339 | 19 | -8,2 | 1094,5153 | 2 | 3,1   | 2,27E+06 |          |          | 7,25E+05 |          | 37       | F37:1785 | 87       | 105 | C1:Carbamylation:0.00;K4:Lysine oxidation to aminoaldehydic semialdehyde:0.00      |                                                                                             |
| 2 | 3 | P05160 | R.CFK(+15.99)K(+27.99)C(-33.99)TKPDLSNGYISDVK.L | Y | 52,22 | 2155,062  | 19 | 8,4  | 719,3673  | 3 | 3,2   | 5,40E+06 |          |          |          |          | 8        | F8:1816  | 87       | 105 | K3:Oxidation or Hydroxylation:21.94;K4:Formylation:3.64;C5:Dehydroalanine(C):13.63 |                                                                                             |
| 2 | 3 | P05160 | R.CFK(+43.99)C(-33.99)TKPDLSNGYISDVK.L          | Y | 50,54 | 2155,062  | 19 | 8,7  | 719,3676  | 3 | 3,2,1 |          | 2,57E+06 | 2,15E+06 | 2,78E+06 | 4,15E+06 | 4,35E+06 | 34       | F34:1863 | 87  | 105                                                                                | K4:Carboxylation(DKW):0.00;C5:Dehydroalanine(C):6.65                                        |
| 2 | 3 | P05160 | R.C(-33.99)FKK(+43.99)KCTKPDLSNGYISDVK.L        | Y | 49,59 | 2155,062  | 19 | 9,4  | 719,368   | 3 | 3,2,5 | 2,26E+06 |          |          | 1,00E+06 | 5,85E+05 | 70       | F70:1881 | 87       | 105 | C1:Dehydroalanine(C):0.00;K4:Carboxylation(DKW):0.00                               |                                                                                             |
| 2 | 3 | P05160 | R.C(+27.99)FK(-1.03)K(+27.99)CTKPDLSNGYISDVK.L  | Y | 49,34 | 2200,0181 | 19 | 3    | 1101,0197 | 2 | 3,0,9 |          | 1,26E+05 | 1,57E+06 | 2,10E+05 |          | 42       | F42:1743 | 87       | 105 | C1:Formylation:16.36;K3:Lysine oxidation to aminoaldehydic semialdehyde:0.00;K     |                                                                                             |

|   |   |        |                                                |   |       |           |    |      |           |       |          |          |          |          |          |          |          |          |          |     |                                                                                                                   |                                                                                                            |
|---|---|--------|------------------------------------------------|---|-------|-----------|----|------|-----------|-------|----------|----------|----------|----------|----------|----------|----------|----------|----------|-----|-------------------------------------------------------------------------------------------------------------------|------------------------------------------------------------------------------------------------------------|
| 2 | 3 | P05160 | R.CFK(+14.96)K(+42.01)CT(-2.02)KPDLNNGYISDVK.L | Y | 49,03 | 2200,0181 | 19 | 5,3  | 1101,0221 | 2,0,9 | 2,37E+06 | 2,21E+06 | 1,36E+06 | 6,28E+05 | 8,60E+04 | 1,33E+06 | 44       | F44:1749 | 87       | 105 | 4:Formylation:0.00<br>K3:Alpha-amino adipic acid:8.69;K4:Acetylation(K):7.64;T6:2-amino-3-oxo-butanoic acid:68.60 |                                                                                                            |
| 2 | 3 | P05160 | R.C(+27.99)FK(-1.03)K(+14.96)CTKPDLNNGYISDVK.L | Y | 47,62 | 2186,9863 | 19 | 9,3  | 1094,5106 | 2,0,7 | 4,45E+06 |          |          | 6,75E+06 | 9,93E+05 | 9,58E+05 | 1,70E+06 | 9        | F9:1723  | 87  | 105                                                                                                               | C1:Formylation:23.15;K3:Lysine oxidation to amino adipic semialdehyde:0.00;K4:Alpha-amino adipic acid:0.00 |
| 2 | 3 | P05160 | R.CFKK(-33.99)TK(+43.99)PDLNNGYISDVK.L         | Y | 46,99 | 2155,062  | 19 | 9,4  | 719,368   | 3,2,1 | 4,86E+06 | 0,00E+00 |          | 3,07E+06 |          | 9,37E+05 |          | 32       | F32:1840 | 87  | 105                                                                                                               | C5:Dehydration(C):0.00;K7:Carboxylation(DKW):0.00                                                          |
| 2 | 3 | P05160 | R.CFK(+43.01)K(-1.03)CTKPDLNNGYISDVK.L         | Y | 43,5  | 2187,0339 | 19 | -9,3 | 730,0118  | 3,1,2 |          | 3,74E+05 |          |          |          |          |          | 17       | F17:1740 | 87  | 105                                                                                                               | K3:Carboxylation:0.00;K4:Lysine oxidation to amino adipic semialdehyde:0.00                                |
| 2 | 3 | P05160 | R.CFKK(+43.99)CT(-2.02)KPDLNNGYISDVK.L         | Y | 40,56 | 2187,0339 | 19 | -12  | 1094,5117 | 2,3,1 |          | 2,20E+06 |          |          | 6,57E+05 |          |          | 27       | F27:1775 | 87  | 105                                                                                                               | K4:Carboxylation(DKW):12.28;T6:2-amino-3-oxo-butanoic acid:52.68                                           |
| 2 | 3 | P05160 | R.C(-33.99)FKKCTK(+31.99)PDLNNGYISDVK.L        | Y | 39,51 | 2143,062  | 19 | -2,5 | 715,3595  | 3,1,5 |          |          |          | 1,04E+06 |          |          |          | 52       | F52:1794 | 87  | 105                                                                                                               | C1:Dehydration(C):0.00;K7:Dihydroxylation:0.00                                                             |
| 2 | 3 | P05160 | R.CFK(+15.99)KCTKPDLNNGYISDVK.L                | Y | 36,95 | 2161,0547 | 19 | 4,7  | 721,3622  | 3,0,9 |          |          | 0,00E+00 |          |          |          |          | 32       | F32:1740 | 87  | 105                                                                                                               | K3:Oxidation or Hydroxylation:17.01                                                                        |
| 2 | 3 | P05160 | F.KK(+43.99)C(+47.98)TKPDLNNGYISDVK.L          | Y | 56,22 | 1986,9568 | 17 | -0,6 | 994,4851  | 2,0,7 |          |          | 1,08E+06 |          |          | 3,85E+05 |          | 18       | F18:1718 | 89  | 105                                                                                                               | K2:Carboxylation(DKW):0.00;C3:Cysteine oxidation to cysteic acid:1000.00                                   |
| 2 | 3 | P05160 | F.K(+43.99)KC(+47.98)TKPDLNNGYISDVK.L          | Y | 44,66 | 1986,9568 | 17 | -1,5 | 994,4842  | 2,0,8 |          |          |          |          | 9,42E+05 |          |          | 16       | F16:1731 | 89  | 105                                                                                                               | K1:Carboxylation(DKW):0.00;C3:Cysteine                                                                     |



|   |   |        |                                             |   |       |           |    |     |          |   |       |          |          |          |          |          |          |          |         |                    |                                                                                       |                                                       |                                  |                                                                                             |  |  |
|---|---|--------|---------------------------------------------|---|-------|-----------|----|-----|----------|---|-------|----------|----------|----------|----------|----------|----------|----------|---------|--------------------|---------------------------------------------------------------------------------------|-------------------------------------------------------|----------------------------------|---------------------------------------------------------------------------------------------|--|--|
| 2 | 3 | P05160 | K.KC[-33.99]T(+79.96)KPDLSNGYISDVK.L        | Y | 65,3  | 1812,8563 | 16 | 9,1 | 907,4437 | 2 | 3,0,2 | 3,22E+06 | 4,78E+06 |          |          | 12       | F12:2456 | 90       | 105     | Dehydroalanine (C) | oxidation to cysteic acid:1000.00<br>C2:Dehydroalanine (C):1000.00;T3:Sulfation:38.30 |                                                       |                                  |                                                                                             |  |  |
| 2 | 3 | P05160 | K.C(+31.99)T[-2.02]KPDLSNGYISDVK.L          | Y | 88,87 | 1668,7665 | 15 | 8   | 835,3972 | 2 | 3,1   | 6,20E+06 | 8,17E+06 | 0,00E+00 |          | 0,00E+00 | 12       | F12:2522 | 91      | 105                |                                                                                       | C1:Dihydroxy:0.00;T2:2-amino-3-oxobutanoic acid:95.62 |                                  |                                                                                             |  |  |
| 2 | 3 | P05160 | K.C(+47.98)TKPDLSNGYISDVK.L                 | Y | 87,93 | 1686,777  | 15 | 7,9 | 844,4024 | 2 | 3,0,3 |          |          |          |          |          | 12       | F12:2462 | 91      | 105                | Cysteine oxidation to cysteic acid                                                    | C1:Cysteine oxidation to cysteic acid:1000.00         |                                  |                                                                                             |  |  |
| 2 | 3 | P05160 | K.CTK(+42.01)P[-30.01]DLSNGYISDVK.L         | Y | 72,71 | 1650,7922 | 15 | 4,9 | 826,4074 | 2 | 3,3,2 |          |          | 3,87E+07 | 1,38E+07 |          | 4,34E+07 | 2,43E+07 | 55      | F55:1959           | 91                                                                                    | 105                                                   | Proline oxidation to pyrrolidone | K3:Acetylation (K):169.05;P4:Proline oxidation to pyrrolidone:1000.00                       |  |  |
| 2 | 3 | P05160 | K.C(+27.99)TKPDLSNGYISDVK.L                 | Y | 62,65 | 1666,7872 | 15 | 7,9 | 834,4075 | 2 | 3,3,5 | 1,86E+06 |          | 2,17E+07 | 9,83E+06 |          | 1,73E+07 | 3,72E+06 | 65      | F65:1981           | 91                                                                                    | 105                                                   |                                  | C1:Formylation:0.00                                                                         |  |  |
| 2 | 3 | P05160 | K.C(+31.99)TKPDLSNGYISDVK.L                 | Y | 56,32 | 1670,7821 | 15 | 7,2 | 836,4044 | 2 | 3,2,9 | 1,37E+07 |          | 4,02E+06 | 1,74E+07 | 7,20E+06 | 9,05E+06 | 3,39E+06 | 30      | F30:1919           | 91                                                                                    | 105                                                   |                                  | C1:Dihydroxy:0.00                                                                           |  |  |
| 2 | 3 | P05160 | K.CT[-2.02]K(+31.99)PDLSNGYISDVK.L          | Y | 52,45 | 1668,7665 | 15 | 7   | 835,3964 | 2 | 3,4,4 |          |          | 3,52E+05 | 1,07E+05 |          |          |          | 25      | F25:1960           | 91                                                                                    | 105                                                   |                                  | T2:2-amino-3-oxobutanoic acid:61.26;K3:Dihydroxy:0.00                                       |  |  |
| 2 | 3 | P05160 | K.C(+27.99)[-33.99]TK(+43.99)PDLSNGYISDVK.L | Y | 52    | 1676,7893 | 15 | 6,9 | 839,4077 | 2 | 3,3,5 |          |          |          |          |          | 1,70E+06 |          | 72      | F72:1955           | 91                                                                                    | 105                                                   |                                  | C1:Formylation:135.57;C1:Dehydroalanine (C):1000.00;K3:Carboxylation (DKW):36.05            |  |  |
| 2 | 3 | P05160 | K.C(+27.99)[+47.98]TK(+43.01)PDLSNGYISDVK.L | Y | 48,4  | 1757,7777 | 15 | 8,8 | 879,9039 | 2 | 2,9,6 | 1,08E+06 |          |          |          |          |          |          | 4       | F4:2591            | 91                                                                                    | 105                                                   |                                  | C1:Formylation:149.52;C1:Cysteine oxidation to cysteic acid:1000.00;K3:Carboxylation:151.17 |  |  |
| 2 | 3 | P05160 | K.CTK(+31.99)PDLSNGYISDVK.L                 | Y | 47,61 | 1670,7821 | 15 | 7,1 | 836,4043 | 2 | 3,3,2 | 3,51E+06 |          |          |          |          | 2,17E+06 |          | 17      | F17:1904           | 91                                                                                    | 105                                                   |                                  | K3:Dihydroxy:0.00                                                                           |  |  |
| 2 | 3 | P05160 | K.CTKPDLSNGYISDVK.L                         | Y | 40,63 | 1638,7922 | 15 | 8,9 | 820,3961 | 2 | 3,3,6 |          |          |          |          | 0,00E+00 |          |          | 67      | F67:1968           | 91                                                                                    | 105                                                   |                                  |                                                                                             |  |  |
| 2 | 3 | P05160 | K.CTK(+27.99)PDLSNGYISDVK.L                 | Y | 39,02 | 1666,7872 | 15 | 8,8 | 834,4083 | 2 | 3,3,3 |          |          | 2,63E+06 |          |          |          |          | 35      | F35:1959           | 91                                                                                    | 105                                                   |                                  | K3:Formylation:0.00                                                                         |  |  |
| 2 | 3 | P05160 | C.TKPDLSNGYISDVK.L                          | Y | 70,84 | 1535,7831 | 14 | 8,8 | 768,9056 | 2 | 2,8,8 | 2,74E+06 |          |          |          |          |          |          | 3       | F3:2344            | 92                                                                                    | 105                                                   |                                  |                                                                                             |  |  |
| 2 | 3 | P051   | K.PDLSNGYISDVK.L                            | Y | 81,   | 1306      | 12 | 7,  | 654,     | 2 | 2     | 1,33E+07 | 9,12E+06 | 7,32E+   | 2,98E+0  | 1,60E+0  | 5,05E+0  | 2,47E+0  | 1,46E+0 | 2,52E+             | 2                                                                                     | F2:2                                                  | 94                               | 105                                                                                         |  |  |





|   |   |        |                                                  |   |       |           |    |      |           |   |      |          |          |          |          |          |          |          |                                                                                                                                  |          |                                                                                                             |     |                                                                                 |
|---|---|--------|--------------------------------------------------|---|-------|-----------|----|------|-----------|---|------|----------|----------|----------|----------|----------|----------|----------|----------------------------------------------------------------------------------------------------------------------------------|----------|-------------------------------------------------------------------------------------------------------------|-----|---------------------------------------------------------------------------------|
| 2 | 3 | P05160 | K.DEEVVQQLS(-2.02)DGGWSSQPTCR.K                  | Y | 37,77 | 2135,8889 | 19 | 2,7  | 1068,9546 | 2 | 58,4 | 8,13E+04 | 1,85E+05 |          | 9        | F9:3664  | 129      | 147      | hydroxy:0.00<br>S9:2-amino-3-oxo-butanoic_acid:4.51                                                                              |          |                                                                                                             |     |                                                                                 |
| 2 | 3 | P05160 | K.DEEVVQQLSDGWSS(-2.02)QPTCR.K                   | Y | 37,67 | 2135,8889 | 19 | 2,3  | 1068,9542 | 2 | 4,4  |          | 0,00E+00 |          | 22       | F22:2988 | 129      | 147      | S14:2-amino-3-oxo-butanoic_acid:0.00                                                                                             |          |                                                                                                             |     |                                                                                 |
| 2 | 3 | P05160 | K.DEEVVQQLSDGWSSQPT(-2.02)CR.K                   | Y | 37,4  | 2135,8889 | 19 | -1,1 | 1068,9506 | 2 | 4,4  | 5,14E+06 | 1,40E+08 |          | 4        | F4:3032  | 129      | 147      | T17:2-amino-3-oxo-butanoic_acid:7.77                                                                                             |          |                                                                                                             |     |                                                                                 |
| 2 | 3 | P05160 | K.DEEVVQC(-33.99)LSD(GWSSSQP(+13.98)TCR.K        | Y | 36,88 | 2117,896  | 19 | -3,1 | 1059,952  | 2 | 6,6  |          |          | 9,62E+05 | 65       | F55:2244 | 129      | 147      | Proline oxidation to pyroglutamic acid:1000.00<br>C7:Dehydr oalanine (C):7.03;P16:Proline oxidation to pyroglutamic acid:1000.00 |          |                                                                                                             |     |                                                                                 |
| 2 | 3 | P05160 | K.DEEVVQC(-33.99)LSD(+15.99)GWSSSQP(+31.99)TCR.K | Y | 36,85 | 2151,9014 | 19 | 2,8  | 1076,9609 | 2 | 5,9  |          | 4,36E+05 |          | 25       | F25:2078 | 129      | 147      | C7:Dehydr oalanine (C):7.06;D10:Oxidation or Hydroxylation:7.81;P16:Dihydroxy:0.00                                               |          |                                                                                                             |     |                                                                                 |
| 2 | 3 | P05160 | K.DEEVVQC(-33.99)LSD(GWSSSQPTCR(+31.99).K        | Y | 36,17 | 2135,9065 | 19 | 9,6  | 1068,9503 | 2 | 4,4  | 0,00E+00 |          |          | 6        | F6:3036  | 129      | 147      | C7:Dehydr oalanine (C):17.89;R19:Dihydroxy:0.00                                                                                  |          |                                                                                                             |     |                                                                                 |
| 2 | 3 | P05160 | K.DEEVVQC(+31.99)LSD(GWSSSQPTC(-33.99)R.K        | Y | 35,44 | 2135,9065 | 19 | 0,6  | 1068,9612 | 2 | 6,5  | 1,82E+07 |          | 1,16E+07 | 69       | F69:2197 | 129      | 147      | C7:Dihydroxy:0.00;C18:Dehydroalanine (C):0.00                                                                                    |          |                                                                                                             |     |                                                                                 |
| 2 | 3 | P05160 | F.KVKDKVQY(+15.01)EC(+67.92)ATGYTAGGK.K          | Y | 37,25 | 2291,0215 | 20 | 10   | 1146,5298 | 2 | 3,3  |          | 0,00E+00 |          | 17       | F17:1752 | 171      | 190      | Y8:Tyrosine oxidation to 2-aminotyrosine:69.64;C10:Dichlorination of tyrosine residues:8.98                                      |          |                                                                                                             |     |                                                                                 |
| 2 | 3 | P05160 | K.VKD(+79.97)KVQYEC(-33.99)ATGYTAGGK.K           | Y | 69,34 | 2125,9722 | 19 | 14   | 1064,0083 | 2 | 1,4  | 2,52E+06 | 2,88E+06 | 0,00E+00 | 1,65E+06 | 0,00E+00 | 39       | F39:1812 | 172                                                                                                                              | 190      | Phosphorylation (HCDR); Dehydroalanine (C)<br>D3:Phosphorylation (HCDR):10.00;C9:Dihydroalanine (C):1000.00 |     |                                                                                 |
| 2 | 3 | P05160 | K.VKD(+43.99)K(+14.96)VQY(+31.99)ECATGYTAGGK.K   | Y | 59,51 | 2170,9365 | 19 | 6,7  | 1086,4828 | 2 | 2,6  | 3,46E+06 | 1,86E+06 | 1,30E+06 | 1,10E+06 | 3,01E+05 | 8,68E+05 | 2,06E+05 | 28                                                                                                                               | F28:1656 | 172                                                                                                         | 190 | D3:Carboxylation (DKW):12.28;K4:Alph a-amino adipic acid:9.40;Y7:Dihydroxy:0.00 |
| 2 | 3 | P051   | K.VKD(+43.99)K(+14.96)VQYEC(+31.9                | Y | 58,   | 2170      | 19 | 8,   | 1086      | 2 | 2    | 1,26E+06 |          | 2,01E+0  | 9,70E+0  | 1,13E+0  | 3,87E+0  | 1,76E+0  | 29                                                                                                                               | F29:     | 172                                                                                                         | 190 | D3:Carbox                                                                       |



|   |   |        |                                                 |   |       |           |    |      |           |   |     |          |          |          |    |          |     |     |                                                                                                                                                    |
|---|---|--------|-------------------------------------------------|---|-------|-----------|----|------|-----------|---|-----|----------|----------|----------|----|----------|-----|-----|----------------------------------------------------------------------------------------------------------------------------------------------------|
| 2 | 3 | P05160 | K.VKDKVQY(+44.99)EC(+31.99)ATGYTAGGK.K          | Y | 47,59 | 2200,9583 | 19 | 11   | 1101,4983 | 2 | 9,6 | 1,21E+06 | 0,00E+00 | 0,00E+00 | 64 | F64:1657 | 172 | 190 | Y7:Oxidation to nitro:69.64;C9:Dehydroxy:14.62                                                                                                     |
| 2 | 3 | P05160 | K.VK(+43.99)DKVQY(+67.92)EC(-33.99)ATGYTAGGK.K  | Y | 47,24 | 2157,9177 | 19 | -0,5 | 1079,9656 | 2 | 0,1 | 1,36E+06 |          |          | 18 | F18:1670 | 172 | 190 | Dehydroalanine (C)<br>K2:Carboxylation (DKW):0.00;Y7:Dechlorination of tyrosine residues:90.32;C9:Dehydroalanine (C):1000.00                       |
| 2 | 3 | P05160 | K.VK(-1.03)D(+79.97)K(-1.03)VQYECATGYTAGGK.K    | Y | 45,38 | 2157,8965 | 19 | 9,3  | 1079,9656 | 2 | 0,2 |          | 9,93E+05 |          | 65 | F65:1703 | 172 | 190 | K2:Lysine oxidation to aminoaldehydic semialdehyde:137.15;D3:Phosphorylation (HCDR):0.00;K4:Lysine oxidation to aminoaldehydic semialdehyde:148.55 |
| 2 | 3 | P05160 | K.VKD(+79.97)KVQY(+44.99)EC(-33.99)ATGYTAGGK.K  | Y | 43,94 | 2170,9573 | 19 | 4,1  | 1086,4904 | 2 | 3,0 |          | 0,00E+00 |          | 71 | F71:1686 | 172 | 190 | Phosphorylation (HCDR); Dehydroalanine (C)<br>D3:Phosphorylation (HCDR):100.00;Y7:Oxidation to nitro:72.73;C9:Dehydroalanine (C):1000.00           |
| 2 | 3 | P05160 | K.VK(+14.96)D(+43.99)KVQY(+31.99)ECATGYTAGGK.K  | Y | 42,83 | 2170,9365 | 19 | 5,8  | 1086,4818 | 2 | 9,9 | 2,24E+05 |          |          | 48 | F48:1668 | 172 | 190 | K2:Alpha-amino adipic acid:0.00;D3:Carboxylation (DKW):0.00;Y7:Dehydroxy:11.10                                                                     |
| 2 | 3 | P05160 | K.VKDK(+43.99)JVQY(+67.92)EC(-33.99)ATGYTAGGK.K | Y | 42,46 | 2157,9177 | 19 | 0,2  | 1079,9659 | 2 | 0,2 | 2,92E+05 | 1,24E+06 |          | 27 | F27:1709 | 172 | 190 | Dehydroalanine (C)<br>K4:Carboxylation (DKW):0.00;Y7:Dechlorination of tyrosine residues:78.19;C9:Dehydroalanine (C):1000.00                       |
| 2 | 3 | P05160 | K.VKDKVQY(-2.02)EC(+79.96)ATGYTAGGK.K           | Y | 40,78 | 2157,9346 | 19 | 7,6  | 1079,9663 | 2 | 0,5 | 7,98E+04 |          |          | 25 | F25:1678 | 172 | 190 | O-Sulfonation (C)<br>Y7:2-amino-3-oxobutanoic acid:49.79;C9:O-Sulfonation                                                                          |

|   |   |        |                                                |   |        |           |    |     |           |   |       |          |          |          |          |          |          |          |     |          |                                                                                                                                                |     |                                                                                                                                                                |
|---|---|--------|------------------------------------------------|---|--------|-----------|----|-----|-----------|---|-------|----------|----------|----------|----------|----------|----------|----------|-----|----------|------------------------------------------------------------------------------------------------------------------------------------------------|-----|----------------------------------------------------------------------------------------------------------------------------------------------------------------|
| 2 | 3 | P05160 | K.VK(+31.99)D(+43.99)K(+14.96)VQYECATGYTAGGK.K | Y | 40,48  | 2170,9365 | 19 | 8,5 | 1086,4847 | 2 | 2,9,8 | 9,41E+05 |          | 6,77E+05 |          |          | 38       | F38:1671 | 172 | 190      | (C):1000.00<br>K2:Dihydroxy:0.00;D3:Carboxylation (DKW):129.22;K4:Alp ha-amino adipic acid:0.00                                                |     |                                                                                                                                                                |
| 2 | 3 | P05160 | K.VKDKVQY(+79.97)EC(-33.99)ATGYTAGGK.K         | Y | 38,01  | 2125,9722 | 19 | 13  | 709,6742  | 3 | 3,1,1 |          |          |          |          |          | 30       | F30:1772 | 172 | 190      | Dehydroalanine (C)<br>Y7:Phosphorylation (STY):25.18;C9:Dehydroalanine (C):1000.00                                                             |     |                                                                                                                                                                |
| 2 | 3 | P05160 | K.VK(-1.03)DK(-1.03)VQYECAT(+79.97)GYTAGGK.K   | Y | 36,69  | 2157,8965 | 19 | 9,1 | 1079,9653 | 2 | 3,0   |          | 0,00E+00 |          |          |          | 28       | F28:1682 | 172 | 190      | K2:Lysine oxidation to amino adipic semialdehyde:88.40; K4:Lysine oxidation to amino adipic semialdehyde:70.02; T11:Phosphorylation (STY):0.00 |     |                                                                                                                                                                |
| 2 | 3 | P05160 | K.VKD(+43.99)KVQY(+15.99)EC(+31.99)ATGYTAGGK.K | Y | 35,53  | 2171,968  | 19 | 7,6 | 1086,9995 | 2 | 3,0,9 | 0,00E+00 |          |          |          |          | 18       | F18:1732 | 172 | 190      | D3:Carboxylation (DKW):0.00;V7:Oxidation or Hydroxylation:0.00;C9:Dihydroxy:8.82                                                               |     |                                                                                                                                                                |
| 2 | 3 | P05160 | K.DKVQYEC(+47.98)ATGYTAGGK.K                   | Y | 11,3,7 | 1900,8148 | 17 | 9,8 | 951,424   | 2 | 2,8,8 | 3,94E+06 |          |          |          |          | 2        | F2:2342  | 174 | 190      | Cysteine oxidation to cysteic acid<br>C7:Cysteine oxidation to cysteic acid:1000.00                                                            |     |                                                                                                                                                                |
| 2 | 3 | P05160 | K.DK(+42.01)VQY(+15.01)EC(+47.98)ATGYTAGGK.K   | Y | 46,41  | 1957,8363 | 17 | 12  | 979,9373  | 2 | 2,9,5 | 0,00E+00 | 3,60E+07 | 3,25E+07 | 0,00E+00 | 0,00E+00 | 1,33E+08 | 1,29E+08 | 62  | F62:1628 | 174                                                                                                                                            | 190 | Cysteine oxidation to cysteic acid<br>K2:Acetylation (K):148.55; Y5:Tyrosine oxidation to 2-aminotyrosine:72.73; C7:Cysteine oxidation to cysteic acid:1000.00 |
| 2 | 3 | P05160 | K.D(+43.01)(+15.99)KVQYEC(+31.99)ATGYTAGGK.K   | Y | 42,89  | 1943,8207 | 17 | 1,2 | 972,9164  | 2 | 2,9,9 | 1,95E+05 |          |          |          |          | 16       | F16:1659 | 174 | 190      | D1:Carbamylation:0.00;D1:Oxidation or Hydroxylation:0.00;C7:Dihydroxy:0.00                                                                     |     |                                                                                                                                                                |
| 2 | 3 | P05160 | K.D(+43.01)K(+15.99)VQY(+31.99)ECATGYTAGGK.K   | Y | 41,66  | 1943,820  | 17 | 2,2 | 972,9156  | 2 | 2,9,9 | 2,09E+05 | 9,35E+04 |          |          |          | 18       | F18:165  | 174 | 190      | D1:Carbamylation:0                                                                                                                             |     |                                                                                                                                                                |





|   |   |        |                                              |   |       |           |    |      |           |   |       |          |          |          |          |          |          |          |          |          |     |          |                                                                                                                        |     |                                                                                                     |
|---|---|--------|----------------------------------------------|---|-------|-----------|----|------|-----------|---|-------|----------|----------|----------|----------|----------|----------|----------|----------|----------|-----|----------|------------------------------------------------------------------------------------------------------------------------|-----|-----------------------------------------------------------------------------------------------------|
| 2 | 3 | P05160 | W.YPESP(+31.99)VCEGRRNRC(+31.99)JPPPLPINSK.I | Y | 35,83 | 2769,3325 | 24 | 4,7  | 924,1225  | 3 | 3,4   |          | 4,25E+06 |          |          |          |          |          | 29       | F29:1972 | 261 | 284      | 14:Dihydroxy:5.08<br>P5:Dihydroxy:0.00;C14:Dihydroxy:17.01                                                             |     |                                                                                                     |
| 2 | 3 | P05160 | P.VCEGRRNRCPPPLPINSK.I                       | Y | 39,8  | 2132,1094 | 19 | 12   | 1067,0751 | 2 | 3,3   |          | 7,23E+05 |          |          |          |          |          | 52       | F52:1916 | 266 | 284      |                                                                                                                        |     |                                                                                                     |
| 2 | 3 | P05160 | R.R(+43.01)(+15.99)NRC(+31.99)PPPLPINSK.I    | Y | 66,8  | 1678,8573 | 14 | -1,2 | 840,4349  | 2 | 3,0,4 |          | 1,30E+07 | 6,65E+06 |          |          |          |          | 19       | F19:2578 | 271 | 284      | R1:Carbamylation:183.32;R1:Oxidation or Hydroxylation:0.00;C4:Dihydroxy:33.98                                          |     |                                                                                                     |
| 2 | 3 | P05160 | R.R(+43.01)(+15.99)NR(+31.99)CPPPLPINSK.I    | Y | 63,35 | 1678,8573 | 14 | 0,5  | 840,4363  | 2 | 3,0,8 | 8,37E+06 |          |          |          |          |          |          | 1        | F1:2537  | 271 | 284      | R1:Carbamylation:166.43;R1:Oxidation or Hydroxylation:0.00;R3:Dihydroxy:0.00                                           |     |                                                                                                     |
| 2 | 3 | P05160 | R.R(+27.99)(+79.97)NRC(+13.98)PPPLPINSK.I    | Y | 50,56 | 1709,8073 | 14 | 2    | 855,9126  | 2 | 2,7,7 | 2,34E+07 | 3,30E+07 | 3,57E+07 | 1,85E+08 | 2,20E+08 | 4,08E+08 | 1,75E+08 | 3,29E+08 | 4,55E+08 | 22  | F22:2343 | 271                                                                                                                    | 284 | R1:Formylation:81.10;R1:Phosphorylation (HCDR):5.47;P5:Proline oxidation to pyroglutamic acid:40.00 |
| 2 | 3 | P05160 | R.R(+27.99)NR(+79.97)CP(+13.98)PPPLPINSK.I   | Y | 43,14 | 1709,8073 | 14 | 3,1  | 855,9135  | 2 | 2,0,6 |          |          | 6,71E+07 | 4,83E+07 | 3,69E+07 |          |          | 70       | F70:1724 | 271 | 284      | R1:Formylation:92.20;R3:Phosphorylation (HCDR):0.00;P5:Proline oxidation to pyroglutamic acid:40.00                    |     |                                                                                                     |
| 2 | 3 | P05160 | R.R(+27.99)NRC(+79.96)P(+13.98)PPPLPINSK.I   | Y | 41,24 | 1709,7977 | 14 | -1,2 | 855,9052  | 2 | 2,7,8 |          |          | 0,00E+00 |          |          |          |          | 24       | F24:2375 | 271 | 284      | R1:Formylation:92.20;C4:O-Sulfonation (C):1000.00;P5:Proline oxidation to pyroglutamic acid:40.00<br>O-Sulfonation (C) |     |                                                                                                     |
| 2 | 3 | P05160 | R.R(+27.99)NRC(+79.97)P(+13.98)PPPLPINSK.I   | Y | 36,87 | 1709,8073 | 14 | 2,9  | 570,9447  | 3 | 2,7,7 |          | 1,00E+07 | 4,39E+07 |          |          | 3,69E+07 |          | 15       | F15:2385 | 271 | 284      | R1:Formylation:49.75;C4:Phosphorylation (HCDR):0.00;P5:Proline oxidation to pyroglutamic acid:40.00                    |     |                                                                                                     |

|   |   |        |                                           |   |       |           |    |     |          |   |   |     |          |          |          |          |          |          |          |                   |                                                                                                                     |          |          |     |     |                  |                                     |
|---|---|--------|-------------------------------------------|---|-------|-----------|----|-----|----------|---|---|-----|----------|----------|----------|----------|----------|----------|----------|-------------------|---------------------------------------------------------------------------------------------------------------------|----------|----------|-----|-----|------------------|-------------------------------------|
| 2 | 3 | P05160 | R.N(+43.01)RC(+79.96)P(-30.01)PPPLPINSK.I | Y | 44,64 | 1524,7177 | 13 | -   | 763,3624 | 2 | 3 | 1,7 | 8,34E+06 | 4,94E+05 | 4,96E+06 | 68       | F68:1802 | 272      | 284      | O-Sulfonation (C) | mic acid:33.98<br>N1:Carbamylation:100.30;C3:O<br>Sulfonation (C):1000.00;P4:Proline oxidation to pyrrolidone:40.00 |          |          |     |     |                  |                                     |
| 2 | 3 | P05160 | R.CPPPLPINSK.I                            | Y | 67,92 | 1209,6063 | 11 | 6,6 | 605,8145 | 2 | 3 | 1   | 2,91E+06 |          |          | 12       | F12:2524 | 274      | 284      |                   |                                                                                                                     |          |          |     |     |                  |                                     |
| 2 | 3 | P05160 | R.C(+15.99)P(+13.98)PPPLPINSK.I           | Y | 40,25 | 1191,5957 | 11 | 6,6 | 596,8091 | 2 | 3 | 2,5 | 7,69E+05 | 8,32E+05 |          | 11       | F11:2644 | 274      | 284      |                   | C1:Oxidation or Hydroxylation (C):0.00;P2:Proline oxidation to pyroglutamic acid:0.00                               |          |          |     |     |                  |                                     |
| 2 | 3 | P05160 | R.CP(+13.98)P(+15.99)PPPLPINSK.I          | Y | 35,38 | 1191,5957 | 11 | 8,1 | 596,8099 | 2 | 3 | 2,4 | 8,74E+05 |          |          | 2        | F2:2650  | 274      | 284      |                   | P2:Proline oxidation to pyroglutamic acid:0.00;P3:Oxidation or Hydroxylation:0.00                                   |          |          |     |     |                  |                                     |
| 2 | 3 | P05160 | C.PPPPLPINSK.I                            | Y | 56,65 | 1058,6124 | 10 | 6   | 530,3167 | 2 | 3 | 0,6 |          | 5,96E+06 | 5,21E+06 | 6,81E+06 | 7,79E+06 | 3,60E+06 | 1,21E+07 | 52                | F52:1725                                                                                                            | 275      | 284      |     |     |                  |                                     |
| 2 | 3 | P05160 | P.PPPLPINSK.I                             | Y | 56,32 | 961,5596  | 9  | 5,2 | 481,7896 | 2 | 3 | 0,4 | 3,49E+05 | 4,67E+05 | 1,37E+06 | 2,32E+07 | 1,29E+07 | 1,49E+07 | 2,50E+07 | 1,10E+07          | 2,44E+07                                                                                                            | 53       | F53:1711 | 276 | 284 |                  |                                     |
| 2 | 3 | P05160 | P.PPLPINSK.I                              | Y | 47,51 | 864,5068  | 8  | 5,7 | 433,2632 | 2 | 3 | 0,6 |          | 1,01E+06 | 5,34E+06 | 7,21E+06 | 8,03E+06 | 5,61E+06 | 6,95E+06 | 9,86E+06          | 80                                                                                                                  | F80:1737 | 277      | 284 |     |                  |                                     |
| 2 | 3 | P05160 | K.IQTHSTTYR.H                             | Y | 72,14 | 1105,5516 | 9  | 0,4 | 553,7829 | 2 | 4 | 4,5 | 2,08E+08 | 3,07E+08 | 1,90E+08 | 4,17E+06 | 2,54E+07 | 3,53E+07 | 2,92E+06 | 2,21E+07          | 4,83E+07                                                                                                            | 15       | F15:1122 | 285 | 293 |                  |                                     |
| 2 | 3 | P05160 | K.IQ(+98)THSTTYR.H                        | Y | 64,4  | 1106,5356 | 9  | 0,5 | 554,2754 | 2 | 7 | 3   | 1,54E+07 | 4,12E+06 | 3,43E+06 | 0,00E+00 | 0,00E+00 | 0,00E+00 | 2,36E+04 |                   |                                                                                                                     | 6        | F6:1419  | 285 | 293 | Deamidation (NQ) | Q2:Deamidation (NQ):1000.00         |
| 2 | 3 | P05160 | K.IQTHSTTY(+15.99)R.H                     | Y | 62,84 | 1121,5465 | 9  | 0,5 | 561,7803 | 2 | 5 | 1   | 4,51E+05 | 4,29E+05 |          |          |          |          |          |                   |                                                                                                                     | 13       | F13:1146 | 285 | 293 |                  | Y8:Oxidation or Hydroxylation:33.98 |
| 2 | 3 | P05160 | K.IQTHSTTY.R                              | Y | 52,46 | 949,4505  | 8  | 0,4 | 475,7323 | 2 | 2 | 2   | 9,09E+05 | 8,52E+05 | 6,67E+06 |          |          |          |          |                   |                                                                                                                     | 23       | F23:1655 | 285 | 292 |                  |                                     |
| 2 | 3 | P05160 | K.IQTHSTTYR(+31.99).H                     | Y | 48,69 | 1137,5415 | 9  | 0,9 | 569,7775 | 2 | 4 | 5   | 1,27E+05 |          |          |          |          |          |          |                   |                                                                                                                     | 15       | F15:1120 | 285 | 293 |                  | R9:Dihydroxy:0.00                   |
| 2 | 3 | P05160 | K.IQTHSTTY.Y                              | Y | 39,46 | 786,3872  | 7  | 1,7 | 787,3958 | 1 | 1 | 3   | 4,84E+05 | 8,41E+05 |          |          |          |          |          |                   |                                                                                                                     | 22       | F22:795  | 285 | 291 |                  |                                     |
| 2 | 3 | P05160 | I.QTHSTTYR.H                              | Y | 52,4  | 992,4675  | 8  | 0,8 | 497,2414 | 2 | 4 | 1   | 2,94E+06 | 1,71E+06 | 2,35E+06 | 2,32E+05 | 2,93E+06 | 1,80E+06 | 4,81E+04 | 1,74E+06          | 3,76E+06                                                                                                            | 24       | F24:1075 | 286 | 293 |                  |                                     |
| 2 | 3 | P05160 | I.Q(+98)THSTTYR.H                         | Y | 40,38 | 993,4516  | 8  | 0,5 | 497,7333 | 2 | 7 | 4   | 3,78E+05 |          |          |          |          |          |          |                   |                                                                                                                     | 5        | F5:1423  | 286 | 293 | Deamidation (NQ) | Q1:Deamidation (NQ):1000.00         |

|   |   |        |                                                   |   |        |           |    |     |           |   |   |          |          |          |          |          |          |          |          | 00       |          |          |                                                                                                      |     |  |
|---|---|--------|---------------------------------------------------|---|--------|-----------|----|-----|-----------|---|---|----------|----------|----------|----------|----------|----------|----------|----------|----------|----------|----------|------------------------------------------------------------------------------------------------------|-----|--|
| 2 | 3 | P05160 | Q.THSTTYR.H                                       | Y | 41,23  | 864,409   | 7  | 2   | 433,2126  | 2 | 2 | 5,12E+05 | 1,09E+05 | 8,56E+05 | 1,50E+06 | 0,00E+00 | 7,23E+05 | 1,44E+06 | 76       | F76:1438 | 287      | 293      |                                                                                                      |     |  |
| 2 | 3 | P05160 | T.HSTTYR.H                                        | Y | 50,48  | 763,3613  | 6  | 5,5 | 382,69    | 2 | 2 | 4,26E+04 | 5,23E+05 | 1,19E+05 | 2,09E+06 | 2,04E+06 | 2,30E+04 | 1,96E+06 | 2,07E+06 | 27       | F27:1406 | 288      | 293                                                                                                  |     |  |
| 2 | 3 | P05160 | R.HGEIVHIEC(+47.98)ELNFEIHGSAEIR.C                | Y | 10,6,9 | 2579,2073 | 22 | 10  | 860,7518  | 3 | 3 | 1,79E+06 | 3,33E+06 | 8,30E+04 |          |          |          |          | 3        | F3:2764  | 294      | 315      | C9:Cysteine oxidation to cysteic acid:0.00                                                           |     |  |
| 2 | 3 | P05160 | R.HGEIVHIE.C                                      | Y | 53,88  | 932,4716  | 8  | 0,6 | 467,2433  | 2 | 2 | 0,00E+00 | 2,52E+06 | 8,48E+05 |          |          |          |          | 22       | F22:2302 | 294      | 301      |                                                                                                      |     |  |
| 2 | 3 | P05160 | R.HGEIVHIECELNFEIHGSAEIR.C                        | Y | 45,4   | 2531,2227 | 22 | 6,1 | 633,8168  | 4 | 4 |          |          |          |          |          | 4,66E+04 | 0,00E+00 | 73       | F73:3346 | 294      | 315      |                                                                                                      |     |  |
| 2 | 3 | P05160 | R.HGEIVHIECELNFEIHGSAEIR(+15.99)CEDGK.W           | Y | 36,81  | 3079,4126 | 27 | 5,4 | 616,8931  | 5 | 5 |          | 9,49E+04 |          |          |          |          |          | 30       | F30:3267 | 294      | 320      | R22:Oxidation or Hydroxylat ion:5.77                                                                 |     |  |
| 2 | 3 | P05160 | R.HGEIVHIECELN(+15.99)FEIHGSAEIR.CEDGK.W          | Y | 36,66  | 3079,4126 | 27 | 6,3 | 616,8937  | 5 | 5 |          | 5,78E+04 |          |          |          |          |          | 28       | F28:3300 | 294      | 320      | N12:Oxidation or Hydroxylat ion:4.78                                                                 |     |  |
| 2 | 3 | P05160 | L.NFEIHGSAEIR.C                                   | Y | 48,6   | 1271,6259 | 11 | 5,4 | 636,8236  | 2 | 2 | 1,98E+04 | 1,39E+04 | 2,07E+04 |          |          | 2,93E+04 | 1,71E+05 | 74       | F74:4260 | 305      | 315      |                                                                                                      |     |  |
| 2 | 3 | P05160 | N.FEIHGSAEIR.C                                    | Y | 43,52  | 1157,5829 | 10 | 6,5 | 579,8025  | 2 | 2 | 1,99E+04 |          | 8,55E+04 |          |          | 2,68E+04 | 7,76E+04 | 73       | F73:3304 | 306      | 315      |                                                                                                      |     |  |
| 2 | 3 | P05160 | F.EIHGSAEIR.C                                     | Y | 44,62  | 1010,5145 | 9  | 3,7 | 506,2664  | 2 | 2 |          |          |          |          | 2,82E+04 | 0,00E+00 |          | 57       | F57:1479 | 307      | 315      |                                                                                                      |     |  |
| 2 | 3 | P05160 | E.IHGSAEIR.C                                      | Y | 45,16  | 881,4719  | 8  | 2,9 | 441,7445  | 2 | 2 | 2,67E+05 |          |          | 9,12E+03 |          | 8,05E+04 | 2,86E+04 | 1        | F1:2099  | 308      | 315      |                                                                                                      |     |  |
| 2 | 3 | P05160 | I.HGSAEIR.C                                       | Y | 53,52  | 768,3878  | 7  | 4,3 | 385,2029  | 2 | 2 | 1,81E+05 | 2,29E+05 | 6,21E+05 | 2,55E+05 | 9,27E+05 | 1,46E+06 | 1,12E+05 | 1,50E+06 | 6,77E+05 | 73       | F73:2798 | 309                                                                                                  | 315 |  |
| 2 | 3 | P05160 | R.CEDGKWTEPPK.C                                   | Y | 58     | 1288,5758 | 11 | 7,6 | 645,3     | 2 | 2 |          |          | 0,00E+00 |          | 4,29E+05 |          |          | 51       | F51:1863 | 316      | 326      |                                                                                                      |     |  |
| 2 | 3 | P05160 | E.DGKWTEPPK.C                                     | Y | 47,51  | 1056,5239 | 9  | 3,2 | 529,2709  | 2 | 2 |          |          | 1,04E+06 |          |          |          |          | 19       | F19:2289 | 318      | 326      |                                                                                                      |     |  |
| 2 | 3 | P05160 | K.WTEPPK.C                                        | Y | 49,7   | 756,3806  | 6  | 2,2 | 379,1984  | 2 | 2 | 5,55E+07 | 8,50E+07 | 1,67E+07 |          |          |          |          | 1        | F1:2213  | 321      | 326      |                                                                                                      |     |  |
| 2 | 3 | P05160 | K.W(+31.99)TEPPK.C                                | Y | 48,68  | 788,3704  | 6  | 6,9 | 395,1952  | 2 | 2 | 2,34E+06 | 5,93E+06 |          |          |          |          |          | 12       | F12:2033 | 321      | 326      | W1:Dihydroxy:57.45                                                                                   |     |  |
| 2 | 3 | P05160 | K.W(+15.99)TEPPK.C                                | Y | 45,88  | 772,3755  | 6  | 6,3 | 387,1975  | 2 | 2 | 4,19E+06 | 4,97E+06 |          |          |          |          |          | 12       | F12:2040 | 321      | 326      | W1:Oxidation (HW):0.00                                                                               |     |  |
| 2 | 3 | P05160 | K.W(+43.01)T(-2.02)EPP(-30.01)KCIEGQEK.V          | Y | 35,18  | 1554,7136 | 13 | 11  | 778,3723  | 2 | 2 |          |          |          |          | 7,12E+05 |          |          | 57       | F57:1619 | 321      | 333      | W1:Carbamylation:4.75;T2:2-amino-3-oxo-butanoic acid:88.25; P5:Proline oxidation to pyrrolidone:8.14 |     |  |
| 2 | 3 | P05160 | P.PKC(+15.99)JEGQEK(+42.01)VACEEPPFIENGAANLHSLK.I | Y | 38,01  | 3095,4692 | 28 | 1,9 | 1032,8323 | 3 | 3 |          | 1,34E+06 |          |          |          |          |          | 29       | F29:2138 | 325      | 352      | C3:Oxidation or Hydroxylat ion (C):0.71;K9:Acetylatio                                                |     |  |

|   |   |        |                                               |   |       |           |    |     |           |   |     |          |          |          |          |          |          |          |          |          |          |          |                                                      |                                   |                                     |
|---|---|--------|-----------------------------------------------|---|-------|-----------|----|-----|-----------|---|-----|----------|----------|----------|----------|----------|----------|----------|----------|----------|----------|----------|------------------------------------------------------|-----------------------------------|-------------------------------------|
| 2 | 3 | P05160 | K.CIEGQEKVAC(+15.99)EPPFIENGAA<br>NLHSK.I     | Y | 67,53 | 2828,3108 | 26 | 1,6 | 943,7761  | 3 | 0,2 | 8,07E+06 | 4,63E+06 | 3,21E+06 | 4,35E+06 | 3,04E+06 | 4,80E+06 | 0,00E+00 | 5        | F5:2651  | 327      | 352      | n(K):0.00<br>C10:Oxidation or Hydroxylation (C):3.75 |                                   |                                     |
| 2 | 3 | P05160 | K.C(+15.99)EGQEKVACEEPPFIENGAA<br>NLHSK.I     | Y | 60,46 | 2828,3108 | 26 | 7,3 | 943,7844  | 3 | 2,6 | 5,58E+06 |          | 2,94E+06 | 6,83E+06 | 5,43E+06 | 2,11E+06 | 1,15E+06 | 38       | F38:1899 | 327      | 352      | C1:Oxidation or Hydroxylation (C):0.00               |                                   |                                     |
| 2 | 3 | P05160 | K.CIEGQEK(+15.99)VACEEPPFIENGAA<br>NLHSK.I    | Y | 60,17 | 2828,3108 | 26 | 7   | 943,7841  | 3 | 2,5 | 6,84E+06 | 5,14E+06 |          | 1,81E+06 | 1,60E+06 | 8,71E+05 |          | 62       | F62:1857 | 327      | 352      | K7:Oxidation or Hydroxylation:28.13                  |                                   |                                     |
| 2 | 3 | P05160 | G.QEK(+43.01)VAC(-33.99)EPPFIENGAA<br>NLHSK.I | Y | 43,58 | 2419,1768 | 22 | 8,3 | 1210,5856 | 2 | 3,1 | 1,15E+06 | 4,55E+05 |          |          |          |          |          | 17       | F17:1893 | 331      | 352      | K3:Carbamylation:1.10;C6:Dehydroalanine (C):0.00     |                                   |                                     |
| 2 | 3 | P05160 | K.VAC(-33.99)EPPFIENGAA<br>NLHSK.I(+79.96)K.I | Y | 65,13 | 2070,9316 | 19 | 6,9 | 1036,4802 | 2 | 1,7 | 1,27E+06 | 0,00E+00 |          |          |          |          |          | 3        | F3:2594  | 334      | 352      | C3:Dehydroalanine (C):0.00;S18:Sulfation:1000.00     |                                   |                                     |
| 2 | 3 | P05160 | E.PPFIENGAA<br>NLHSK.I                        | Y | 76,38 | 1493,7626 | 14 | 8   | 747,8945  | 2 | 4,2 | 1,05E+07 | 9,80E+06 | 1,36E+07 | 5,68E+07 | 5,07E+07 | 6,38E+07 | 5,29E+07 | 4,92E+07 | 3,79E+07 | 52       | F52:2019 | 339                                                  | 352                               |                                     |
| 2 | 3 | P05160 | P.PPFIENGAA<br>NLHSK.I                        | Y | 74,3  | 1396,7098 | 13 | 8,2 | 699,3679  | 2 | 4,2 |          |          | 6,93E+05 | 6,94E+06 | 1,16E+07 | 1,67E+07 | 6,31E+06 | 1,03E+07 | 1,08E+07 | 77       | F77:2031 | 340                                                  | 352                               |                                     |
| 2 | 3 | P05160 | I.ENGAAN<br>NLHSK.I                           | Y | 48,27 | 1039,5046 | 10 | 6   | 520,7627  | 2 | 4,3 |          |          | 7,60E+05 | 3,17E+06 | 2,89E+06 | 1,49E+06 |          | 1,04E+06 | 77       | F77:2044 | 343      | 352                                                  |                                   |                                     |
| 2 | 3 | P05160 | E.NGAAN<br>NLHSK.I                            | Y | 61,48 | 910,462   | 9  | 3,1 | 456,2397  | 2 | 2,7 | 3,32E+06 | 4,62E+06 | 1,90E+06 |          |          |          |          |          |          | 19       | F19:1818 | 344                                                  | 352                               |                                     |
| 2 | 3 | P05160 | E.N(+.98)GAAN<br>NLHSK.I                      | Y | 56,06 | 911,446   | 9  | 4,3 | 456,7323  | 2 | 2,4 | 2,48E+05 | 6,82E+05 | 2,85E+05 |          |          |          |          |          |          | 19       | F19:1789 | 344                                                  | 352                               | N1:Deamidation (NQ):59.20           |
| 2 | 3 | P05160 | S.KIYYNGDK.V                                  | Y | 39,68 | 999,5025  | 8  | 3,2 | 1000,513  | 1 | 9,3 | 0,00E+00 |          |          |          |          |          |          |          |          | 4        | F4:1592  | 352                                                  | 359                               |                                     |
| 2 | 3 | P05160 | K.IYYNGDK.V                                   | Y | 66,21 | 871,4075  | 7  | 1,1 | 872,4158  | 1 | 2,3 | 2,05E+08 | 2,51E+08 | 5,95E+07 | 1,38E+06 |          |          | 1,17E+06 |          |          | 24       | F24:1830 | 353                                                  | 359                               |                                     |
| 2 | 3 | P05160 | K.IYYN(+.98)GDK.V                             | Y | 55,95 | 872,3915  | 7  | 7,6 | 873,4055  | 1 | 4,9 | 1,64E+07 | 1,75E+07 | 2,44E+06 |          |          |          | 8,45E+04 |          |          | 2        | F2:2006  | 353                                                  | 359                               | N4:Deamidation (NQ):1000.00         |
| 2 | 3 | P05160 | K.IYYNGDKV.TY.A                               | Y | 54,45 | 1234,5869 | 10 | 4,2 | 618,2982  | 2 | 9,8 | 0,00E+00 | 0,00E+00 |          |          |          |          |          |          |          | 15       | F15:2590 | 353                                                  | 362                               |                                     |
| 2 | 3 | P05160 | K.IY(+15.99)YNGDK.V                           | Y | 52,53 | 887,4025  | 7  | -4  | 888,4062  | 1 | 3,9 | 4,09E+06 | 2,69E+06 |          |          |          |          |          |          |          | 13       | F13:1965 | 353                                                  | 359                               | Y2:Oxidation or Hydroxylation:22.99 |
| 2 | 3 | P05160 | K.IYY(+15.99)NGDK.V                           | Y | 50,44 | 887,4025  | 7  | 0,5 | 888,4102  | 1 | 3,5 | 7,41E+05 | 6,27E+05 |          |          |          |          |          |          |          | 15       | F15:1964 | 353                                                  | 359                               | Y3:Oxidation or Hydroxylation:0.00  |
| 2 | 3 | P05160 | K.IY(+31.99)YNGDK.V                           | Y | 45,16 | 903,3974  | 7  | 5,8 | 904,3994  | 1 | 3,3 | 2,55E+05 | 1,07E+06 |          |          |          |          |          |          |          | 15       | F15:1942 | 353                                                  | 359                               | Y2:Dihydroxy:0.00                   |
| 2 | 3 | P05160 | I.YYNGDK.V                                    | Y | 44,36 | 758,3235  | 6  | 0,1 | 759,3309  | 1 | 3,3 | 3,69E+05 | 1,07E+06 | 1,30E+06 |          |          |          |          |          |          | 24       | F24:1926 | 354                                                  | 359                               |                                     |
| 2 | 3 | P05160 | K.VTYACK.S                                    | Y | 48,84 | 731,316   | 6  | 6,2 | 732,3278  | 1 | 8,2 | 1,27E+06 | 1,48E+06 |          |          |          |          |          |          |          | 12       | F12:1440 | 360                                                  | 365                               |                                     |
| 2 | 3 | P05160 | K.SGYLLHGSNEITC(+47.98)NR.G                   | Y | 10,08 | 1710,7632 | 15 | 10  | 856,3977  | 2 | 9,2 | 2,54E+06 | 3,48E+06 |          |          | 0,00E+00 |          |          |          | 2        | F2:2375  | 366      | 380                                                  | C13:Cysteine oxidation to cysteic |                                     |

|   |   |        |                                                 |   |       |           |    |      |           |   |       |          |          |          |          |          |          |          |          |          |     |                                                                                                                 |                                                                                                                                                     |     |                                                                                                             |
|---|---|--------|-------------------------------------------------|---|-------|-----------|----|------|-----------|---|-------|----------|----------|----------|----------|----------|----------|----------|----------|----------|-----|-----------------------------------------------------------------------------------------------------------------|-----------------------------------------------------------------------------------------------------------------------------------------------------|-----|-------------------------------------------------------------------------------------------------------------|
| 2 | 3 | P05160 | K.SGYLLHGSNEITCNR.G                             | Y | 88,38 | 1662,7784 | 15 | 7,9  | 832,4031  | 2 | 3,2,8 |          |          | 1,06E+06 | 0,00E+00 | 7,68E+05 | 9,49E+05 | 65       | F65:1920 | 366      | 380 | acid:0.00                                                                                                       |                                                                                                                                                     |     |                                                                                                             |
| 2 | 3 | P05160 | K.SGYLLHGSNEIT(-2.02)C(+31.99)NR.G              | Y | 69,36 | 1692,7526 | 15 | 8,5  | 847,3907  | 2 | 2,9,9 | 2,28E+06 | 2,37E+06 |          |          |          |          | 11       | F11:2420 | 366      | 380 | T12:2-amino-3-oxo-butanoic_acid:97.69; C13:Dihydroxy:11.10                                                      |                                                                                                                                                     |     |                                                                                                             |
| 2 | 3 | P05160 | K.SGYLLHGSNEIT(-2.02)C(+15.99)NR.G              | Y | 69,04 | 1676,7577 | 15 | 9,1  | 839,3937  | 2 | 3,0,6 | 1,97E+06 | 1,98E+06 |          |          |          |          | 2        | F2:2500  | 366      | 380 | Oxidation or Hydroxylation (C) T12:2-amino-3-oxo-butanoic_acid:28.70; C13:Oxidation or Hydroxylation (C):100.00 |                                                                                                                                                     |     |                                                                                                             |
| 2 | 3 | P05160 | K.SGYLLHGSNEITCNRGKWTLP.P                       | Y | 63,94 | 2344,127  | 21 | -1   | 1173,0696 | 2 | 3,1,8 | 2,68E+07 | 2,53E+07 | 0,00E+00 | 6,99E+06 | 1,12E+07 | 3,73E+06 | 4,96E+06 | 70       | F70:1821 | 366 | 386                                                                                                             |                                                                                                                                                     |     |                                                                                                             |
| 2 | 3 | P05160 | K.SGYLLHGSNE.E                                  | Y | 62,8  | 946,4508  | 9  | 0,6  | 474,2329  | 2 | 2,7,3 | 1,72E+07 | 1,25E+07 | 8,44E+06 |          |          |          |          | 24       | F24:2320 | 366 | 374                                                                                                             |                                                                                                                                                     |     |                                                                                                             |
| 2 | 3 | P05160 | K.SGYLLHGSNEITCNRGK(+43.01)W(+13.98)T.L         | Y | 59,44 | 2192,0068 | 19 | -6,5 | 1097,0035 | 2 | 3,4,2 | 3,98E+06 | 6,55E+06 | 1,24E+07 | 3,02E+07 | 2,94E+07 | 4,82E+07 | 3,30E+07 | 4,40E+07 | 3,26E+07 | 81  | F81:2020                                                                                                        | 366                                                                                                                                                 | 384 | Tryptophan oxidation to oxolactone K17:Carbamylation:167.58;W18:Tryptophan oxidation to oxolactone :1000.00 |
| 2 | 3 | P05160 | K.SGYLLHGSNEITCNRGK(+43.99)W(+44.99)T.L         | Y | 54,54 | 2223,9968 | 19 | 8,1  | 1113,0146 | 2 | 3,0,2 | 4,55E+06 | 8,19E+06 |          | 3,61E+06 | 1,64E+06 | 2,07E+06 | 5,16E+05 | 18       | F18:1676 | 366 | 384                                                                                                             | Carboxylation (DKW) K17:Carboxylation (DKW):100.00;W18:Oxidation to nitro:110.25                                                                    |     |                                                                                                             |
| 2 | 3 | P05160 | K.SGYLLHGSNE.I                                  | Y | 53,71 | 1075,4934 | 10 | 0,2  | 1076,5009 | 1 | 2,9,6 | 6,71E+07 | 7,46E+07 | 2,19E+07 |          |          |          |          | 19       | F19:2499 | 366 | 375                                                                                                             |                                                                                                                                                     |     |                                                                                                             |
| 2 | 3 | P05160 | K.SGYLLHGSNEITCNR(-43.05)GKW(+19.99)T           | Y | 50,47 | 2010,9105 | 18 | 6,1  | 1006,4686 | 2 | 2,9,9 | 5,00E+05 |          | 0,00E+00 | 3,08E+06 | 7,89E+05 |          |          | 8        | F8:1648  | 366 | 383                                                                                                             | Tryptophan oxidation to hydroxykynurenin R15:Arginine oxidation to glutamic semialdehyde:86.00; W18:Tryptophan oxidation to hydroxykynurenin:100.00 |     |                                                                                                             |
| 2 | 3 | P05160 | K.SGYLLHGSNEITCNRGK(+43.99)W(+31.99)T.L         | Y | 50,11 | 2211,0015 | 19 | -4   | 1106,5035 | 2 | 3,0,4 |          | 1,85E+06 |          |          |          |          |          | 18       | F18:1696 | 366 | 384                                                                                                             | K17:Carboxylation (DKW):0.00;W18:Dihydroxy:0.00                                                                                                     |     |                                                                                                             |
| 2 | 3 | P05160 | K.SGYLLHGSNEITC(+47.98)NR(+31.99)GKW(+15.99)TLP | Y | 47,06 | 2344,0754 | 20 | 6,4  | 1173,0525 | 2 | 2,2,9 |          | 0,00E+00 |          |          |          |          |          | 14       | F14:2483 | 366 | 385                                                                                                             | Cysteine oxidation to cysteic acid C13:Cysteine oxidation to cysteic acid:100.00;R15:Dihydroxy:8.22;W18:Oxi                                         |     |                                                                                                             |



|   |   |        |                                                         |   |       |           |    |     |           |   |       |          |          |          |          |          |          |          | 00       |          |          |                         |                                    |                                                                                         |                                                                          |                                                                                                                                                                  |
|---|---|--------|---------------------------------------------------------|---|-------|-----------|----|-----|-----------|---|-------|----------|----------|----------|----------|----------|----------|----------|----------|----------|----------|-------------------------|------------------------------------|-----------------------------------------------------------------------------------------|--------------------------------------------------------------------------|------------------------------------------------------------------------------------------------------------------------------------------------------------------|
| 2 | 3 | P05160 | K.HPPVVMNGAVADGILASYATGSSVE.Y                           | Y | 87,04 | 2441,1897 | 25 | 5,7 | 1221,6091 | 2 | 3,7,7 | 1,16E+07 | 8,06E+06 |          |          |          |          | 1        | F1:3170  | 398      | 422      |                         |                                    |                                                                                         |                                                                          |                                                                                                                                                                  |
| 2 | 3 | P05160 | K.HPPVVM(+31.99)NGAVADGILASYATGSSVEYR.C                 | Y | 81,96 | 2792,344  | 27 | 9,7 | 931,7977  | 3 | 3,3,4 | 2,89E+06 | 4,17E+06 |          |          |          |          | 2        | F2:2731  | 398      | 424      | Dioxi-<br>dation<br>(M) | M6:Diox-<br>idation<br>(M):1000.00 |                                                                                         |                                                                          |                                                                                                                                                                  |
| 2 | 3 | P05160 | K.HPPVVMNGAVADGILASYATGSSVEYR.C                         | Y | 81,59 | 2776,3489 | 27 | 9,1 | 1389,1943 | 2 | 3,6,3 | 8,86E+04 | 6,84E+06 | 9,50E+05 | 1,29E+06 | 5,40E+06 | 3,65E+06 | 5,54E+07 | 1,53E+06 | 66       | F66:2220 | 398                     | 424                                |                                                                                         |                                                                          |                                                                                                                                                                  |
| 2 | 3 | P05160 | K.HP(+15.99)PVMNGAVADGILASYATGSSVEYR.C                  | Y | 77,52 | 2776,3489 | 27 | 4   | 926,4606  | 3 | 4,4,8 | 6,20E+04 | 9,21E+05 | 3,84E+06 | 5,86E+05 | 1,71E+06 | 4,52E+05 | 4,37E+05 | 1,19E+06 | 2,87E+06 | 62       | F62:2820                | 398                                | 424                                                                                     | P2:Oxida-<br>tion or<br>Hydroxylat-<br>ion:0.00                          |                                                                                                                                                                  |
| 2 | 3 | P05160 | K.HPPVVMN(+.98)GAVADGILASYATGSSVEY                      | Y | 76,99 | 2442,1736 | 25 | 6,4 | 1222,1019 | 2 | 3,8   | 3,34E+05 | 5,96E+06 |          |          |          |          |          |          |          | 1        | F1:3198                 | 398                                | 422                                                                                     | Deamidi-<br>ation<br>(NQ)                                                | N7:Deami-<br>dation<br>(NQ):1000.00                                                                                                                              |
| 2 | 3 | P05160 | K.HPPVVM(+15.99)NGAVADGILASYATGSSVEY                    | Y | 76,3  | 2457,1846 | 25 | 3,4 | 1229,6038 | 2 | 3,6,3 | 3,99E+06 |          |          |          |          |          |          |          |          | 1        | F1:3045                 | 398                                | 422                                                                                     | Oxidation<br>(M)                                                         | M6:Oxidat-<br>ion<br>(M):1000.00                                                                                                                                 |
| 2 | 3 | P05160 | K.H(+43.01)P(-30.01)P(-30.01)VVMNGAVADGILASYATGSSVEYR.C | Y | 75,92 | 2743,3386 | 27 | 6,7 | 1372,6858 | 2 | 3,7,9 | 1,63E+07 | 6,30E+06 | 5,01E+06 |          |          |          |          |          |          | 7        | F7:2378                 | 398                                | 424                                                                                     | Proline<br>oxidation<br>to<br>pyrrolidin-<br>one                         | H1:Carba-<br>mylation:5<br>4.02:P2:Pr-<br>oline<br>oxidation<br>to<br>pyrrolidino-<br>ne:1000.00<br>;P3:Proline<br>oxidation<br>to<br>pyrrolidino-<br>ne:1000.00 |
| 2 | 3 | P05160 | K.HPPVVM(+15.99)N(+.98)GAVADGILASYATGSSVEYR.C           | Y | 74,82 | 2777,333  | 27 | 8,4 | 926,7927  | 3 | 3,7,7 | 6,08E+06 | 3,66E+06 | 7,54E+07 | 9,27E+07 | 2,35E+07 | 7,40E+07 | 5,31E+07 | 4,27E+07 | 45       | F45:2091 | 398                     | 424                                | Oxidation<br>(M);<br>Deamidi-<br>ation<br>(NQ)                                          | M6:Oxidat-<br>ion<br>(M):1000.00<br>;N7:Dea-<br>midation<br>(NQ):1000.00 |                                                                                                                                                                  |
| 2 | 3 | P05160 | K.HPPVVMNGAVADGILASYA                                   | Y | 73,83 | 1809,9083 | 18 | 7,5 | 905,9683  | 2 | 3,7,3 | 1,16E+07 | 1,39E+07 | 2,07E+07 |          |          |          |          |          |          | 9        | F9:2270                 | 398                                | 415                                                                                     |                                                                          |                                                                                                                                                                  |
| 2 | 3 | P05160 | K.HPPVVMNGAVADGILASYATGSS                               | Y | 72,58 | 2126,0466 | 22 | 6,6 | 1064,0376 | 2 | 3,7,7 | 0,00E+00 | 1,05E+06 | 0,00E+00 |          |          |          |          |          |          | 7        | F7:2366                 | 398                                | 419                                                                                     |                                                                          |                                                                                                                                                                  |
| 2 | 3 | P05160 | K.HPPVVMNGAVAD(+15.99)GILASYATGSSVEYR.C                 | Y | 72,24 | 2776,3489 | 27 | 2,4 | 926,4591  | 3 | 3,3,7 | 4,58E+06 | 6,79E+06 | 2,39E+06 | 1,72E+06 | 1,90E+06 | 1,61E+06 | 1,97E+06 | 2,87E+06 | 15       | F15:2956 | 398                     | 424                                | D12:Oxida-<br>tion or<br>Hydroxylat-<br>ion:0.00                                        |                                                                          |                                                                                                                                                                  |
| 2 | 3 | P05160 | K.HPPVVM(+15.99)NGAVADGILASYATGSS                       | Y | 71,11 | 2142,0415 | 22 | 7,6 | 1072,0361 | 2 | 3,6,3 |          |          | 5,88E+06 | 2,58E+06 | 4,30E+06 | 7,84E+06 | 6,19E+06 | 3,27E+06 | 30       | F30:2219 | 398                     | 419                                | Oxidation<br>(M)                                                                        | M6:Oxidat-<br>ion<br>(M):1000.00                                         |                                                                                                                                                                  |
| 2 | 3 | P05160 | K.HPPVVMN(+.98)GAVADGILASYATGSS                         | Y | 71,08 | 2039,9985 | 21 | 5,8 | 1021,0125 | 2 | 3,7,7 | 1,80E+06 |          |          |          |          |          |          |          |          | 1        | F1:3171                 | 398                                | 418                                                                                     | Deamidi-<br>ation<br>(NQ)                                                | N7:Deami-<br>dation<br>(NQ):1000.00                                                                                                                              |
| 2 | 3 | P05160 | K.HPP(+15.99)VVMN(+.98)GAVADGILASYATGSSVEYR.C           | Y | 69,78 | 2777,333  | 27 | 9,3 | 926,7935  | 3 | 3,7,4 |          |          | 5,20E+06 | 4,15E+06 | 8,80E+03 | 2,57E+07 | 4,95E+06 | 80       | F80:2303 | 398      | 424                     | Deamidi-<br>ation<br>(NQ)          | P3:Oxida-<br>tion or<br>Hydroxylat-<br>ion:0.00;N<br>7:Deamida-<br>tion<br>(NQ):1000.00 |                                                                          |                                                                                                                                                                  |
| 2 | 3 | P05160 | K.H(+27.99)PP(-30.01)VVMN(+.98)GAVADGILASYATGSSVEYR.C   | Y | 69,75 | 2759,3225 | 27 | 8,7 | 1380,6805 | 2 | 3,7,1 | 0,00E+00 | 0,00E+00 | 0,00E+00 | 2,43E+06 | 0,00E+00 | 2,76E+06 | 0,00E+00 | 39       | F39:2299 | 398      | 424                     | Deamidi-<br>ation<br>(NQ)          | H1:Formyl-<br>ation:68.0<br>5;P3:Proline<br>oxidation                                   |                                                                          |                                                                                                                                                                  |

|   |   |        |                                                         |   |       |           |    |     |           |   |     |          |          |          |          |          |          |          |          |          |     |                                        |                                                                                                     |                                                                              |
|---|---|--------|---------------------------------------------------------|---|-------|-----------|----|-----|-----------|---|-----|----------|----------|----------|----------|----------|----------|----------|----------|----------|-----|----------------------------------------|-----------------------------------------------------------------------------------------------------|------------------------------------------------------------------------------|
| 2 | 3 | P05160 | K.HP(+31.99)P(+31.99)VVM(-48.00)NGAVADGILASYATGSSVEYR.C | Y | 69,31 | 2776,3303 | 27 | 5   | 926,4554  | 3 | 57  |          | 0,00E+00 | 3,20E+05 | 3,10E+05 | 7,13E+05 | 6,61E+04 | 2,78E+05 | 52       | F52:3575 | 398 | 424                                    | Dethiomethyl                                                                                        | to pyrrolidone:0.00;N7:Deamidation(NQ):1000.00                               |
| 2 | 3 | P05160 | K.HPPVVMNGAVADGILASYA.T                                 | Y | 68,91 | 1880,9454 | 19 | 4,3 | 941,4841  | 2 | 7,7 | 2,23E+07 | 1,34E+07 | 8,95E+06 |          |          |          |          | 1        | F1:3169  | 398 | 416                                    |                                                                                                     | P2:Dihydroxy:15.89;P3:Dihydroxy:16.63;M6:Dethiomethyl:1000.00                |
| 2 | 3 | P05160 | K.HPPVVM(+15.99)NGAVADGILASYA                           | Y | 68,04 | 1825,9032 | 18 | 8,1 | 913,9663  | 2 | 6,1 | 3,57E+07 | 1,01E+07 | 1,22E+07 | 3,54E+07 | 1,81E+07 | 5,73E+06 | 62       | F62:2162 | 398      | 415 | Oxidation(M)                           | M6:Oxidation(M):1000.00                                                                             |                                                                              |
| 2 | 3 | P05160 | K.HPPVVMNGAVADGILASYATG.S                               | Y | 66,81 | 2039,0145 | 21 | 4,1 | 1020,5187 | 2 | 7,5 | 2,84E+06 |          |          |          |          |          |          | 1        | F1:3150  | 398 | 418                                    |                                                                                                     |                                                                              |
| 2 | 3 | P05160 | K.HP(+15.99)PVVMN(+.98)GAVADGILASYATGSSVEYR.C           | Y | 66,64 | 2777,333  | 27 | 6,9 | 926,7913  | 3 | 37  | 1,41E+07 |          |          | 1,60E+07 |          |          | 29       | F29:2281 | 398      | 424 | Deamidation(NQ)                        | P2:Oxidation or Hydroxylation:0.00;N7:Deamidation(NQ):1000.00                                       |                                                                              |
| 2 | 3 | P05160 | K.HPPVVMN(+.98)GAVAD(+15.99)GILASYATGSSVEYR.C           | Y | 66,17 | 2777,333  | 27 | 9,1 | 926,7934  | 3 | 7,4 | 0,00E+00 | 8,62E+06 | 2,41E+06 | 1,61E+03 |          | 7,52E+06 | 43       | F43:2293 | 398      | 424 | Deamidation(NQ)                        | N7:Deamidation(NQ):1000.00;D12:Oxidation or Hydroxylation:1.49                                      |                                                                              |
| 2 | 3 | P05160 | K.HPP(+31.99)VVM(-48.00)N(+15.99)GAVADGILASYATGSSVEYR.C | Y | 64,63 | 2760,3354 | 27 | 1,5 | 1381,177  | 2 | 6,9 | 2,42E+04 |          |          | 0,00E+00 |          |          |          | 36       | F36:2267 | 398 | 424                                    | Dethiomethyl                                                                                        | P3:Dihydroxy:0.00;M6:Dethiomethyl:1000.00;N7:Oxidation or Hydroxylation:0.00 |
| 2 | 3 | P05160 | K.HPP(-27.99)VVMN(+.98)GAVAD(+43.99)GILASYATGSSVEYR.C   | Y | 63,48 | 2777,333  | 27 | 9,2 | 926,7935  | 3 | 6,9 | 2,34E+07 |          |          | 1,26E+06 |          |          | 30       | F30:2268 | 398      | 424 | Deamidation(NQ);Carboxylation(DKW)     | P3:Pyrrolidone from Proline:0.00;N7:Deamidation(NQ):1000.00;D12:Carboxylation(DKW):1000.00          |                                                                              |
| 2 | 3 | P05160 | K.HP(+13.98)P(+13.98)VVMNGAVADGILASYATGSSVEYR.C         | Y | 62,5  | 2816,3076 | 27 | 4,2 | 939,7804  | 3 | 6,3 | 5,42E+04 | 3,14E+04 |          |          |          |          | 8        | F8:4092  | 398      | 424 | Proline oxidation to pyroglutamic acid | P2:Proline oxidation to pyroglutamic acid:1000.00;P3:Proline oxidation to pyroglutamic acid:1000.00 |                                                                              |
| 2 | 3 | P05160 | K.HP(-30.01)PVVMN(+.98)GAVADGILASYATGSSVEYR.C           | Y | 62,46 | 2759,3225 | 27 | 8,3 | 920,7891  | 3 | 3,8 | 4,38E+05 | 3,20E+06 | 0,00E+00 | 0,00E+00 | 1,39E+05 |          | 11       | F11:2746 | 398      | 424 | Deamidation(NQ)                        | P2:Proline oxidation to                                                                             |                                                                              |





|   |   |        |                                                         |   |       |           |    |      |           |   |      |          |          |          |          |          |          |     |                                                                                                       |                                                                                       |
|---|---|--------|---------------------------------------------------------|---|-------|-----------|----|------|-----------|---|------|----------|----------|----------|----------|----------|----------|-----|-------------------------------------------------------------------------------------------------------|---------------------------------------------------------------------------------------|
|   |   |        |                                                         |   |       |           |    |      |           |   |      |          |          |          |          |          |          |     | pyroglutamic acid:1000;P3:Proline oxidation to pyroglutamic acid:1000;D12:Carboxylation (DKW):1000.00 |                                                                                       |
| 2 | 3 | P05160 | K.HPPVVMNG.A                                            | Y | 52,98 | 849,4167  | 8  | -1,5 | 850,4227  | 1 | 26,4 | 0,00E+00 | 0,00E+00 | 0,00E+00 |          | 5        | F5:2286  | 398 | 405                                                                                                   |                                                                                       |
| 2 | 3 | P05160 | K.HPPVVMNGAVADGILASYAT.G                                | Y | 52,66 | 1981,9932 | 20 | -0,9 | 992,0029  | 2 | 35,3 |          |          | 0,00E+00 |          | 22       | F22:3065 | 398 | 417                                                                                                   |                                                                                       |
| 2 | 3 | P05160 | K.H(+15.99)P(+31.99)PVVM(-48.00)NGAVADGILASYATGSSVEYR.C | Y | 50,54 | 2760,3354 | 27 | -7,4 | 1381,1648 | 2 | 36,9 |          |          | 0,00E+00 |          | 29       | F29:2271 | 398 | 424                                                                                                   | H1:Oxidation (HW);Dethiomethyl                                                        |
| 2 | 3 | P05160 | K.HPPVVM(+15.99)NGAVADGIL.A                             | Y | 50,41 | 1504,7708 | 15 | 7,7  | 753,3984  | 2 | 25,5 | 1,09E+06 | 7,63E+05 | 2,22E+06 |          | 12       | F12:2647 | 398 | 412                                                                                                   | M6:Oxidation (M):1000.00                                                              |
| 2 | 3 | P05160 | K.HPPVVM(+15.99)NGAVADGILAS.Y                           | Y | 49,76 | 1662,84   | 17 | 5,6  | 832,4319  | 2 | 44,4 | 3,21E+06 |          | 4,97E+06 | 1,88E+06 | 2,36E+06 | F29:2060 | 398 | 414                                                                                                   | M6:Oxidation (M):1000.00                                                              |
| 2 | 3 | P05160 | K.H(-23.02)PPVVMNGAVADGILAS(+79.96)YATGSSVEYR.C         | Y | 49,72 | 2817,2949 | 27 | 3,7  | 940,1091  | 3 | 72,2 | 6,69E+04 |          |          |          | 7        | F7:4279  | 398 | 424                                                                                                   | H1:his2asn:1000.00;S17:Sulfation:17.01                                                |
| 2 | 3 | P05160 | K.H(-22.03)P(+15.99)PVVMNGAVAD(+79.97)GILASYATGSSVEYR.C | Y | 49,56 | 2834,2834 | 27 | 4,4  | 945,7726  | 3 | 67,4 |          |          |          | 3,10E+03 | 80       | F80:4159 | 398 | 424                                                                                                   | H1:his2asp:1000.00;P2:Oxidation of Hydroxyl ion:0.00;D12:Phosphorylation (HCDR):83.43 |
| 2 | 3 | P05160 | K.HPPVVMN(+15.99)GAVADGILASYATGS.S                      | Y | 49,37 | 2142,0415 | 22 | 6,9  | 1072,0354 | 2 | 36,5 |          |          | 7,91E+05 |          | 35       | F35:2229 | 398 | 419                                                                                                   | N7:Oxidation or Hydroxyl ion:25.91                                                    |
| 2 | 3 | P05160 | K.HPP(+31.99)VVM(-48.00)NGAVAD(+15.99)GILASYATGSSVEYR.C | Y | 49,24 | 2760,3354 | 27 | 3,8  | 921,1226  | 3 | 37,1 |          |          | 1,83E+05 |          | 0,00E+00 | F48:2268 | 398 | 424                                                                                                   | P3:Dihydroxy:0.00;M6:Dethiomethyl:1000.00;D12:Oxidation or Hydroxyl ion:1.60          |
| 2 | 3 | P05160 | K.H(-23.02)PPVVM(+15.99)NGAVAD(+79.97)GILASYATGSSVEYR.C | Y | 49,04 | 2833,2993 | 27 | 6,4  | 945,4464  | 3 | 59,9 |          |          | 0,00E+00 |          | 30       | F30:4119 | 398 | 424                                                                                                   | H1:his2asn:1000.00;M6:Oxidation (M):1000.00;D12:Phosphorylation (HCDR):82.83          |
| 2 | 3 | P05160 | K.HPPVVM(+15.99)NGAVADGILASYAT                          | Y | 48,37 | 1896,5940 | 19 | 9,4  | 949,4864  | 2 | 36,6 |          |          | 0,00E+00 |          | 46       | F46:225  | 398 | 416                                                                                                   | Oxidation (M)                                                                         |









|   |   |            |                                                       |   |           |                   |    |              |                   |              |              |              |              |                  |                  |                  |                                                                                                                  |                                                                                         |                                                                            |
|---|---|------------|-------------------------------------------------------|---|-----------|-------------------|----|--------------|-------------------|--------------|--------------|--------------|--------------|------------------|------------------|------------------|------------------------------------------------------------------------------------------------------------------|-----------------------------------------------------------------------------------------|----------------------------------------------------------------------------|
| 2 | 3 | P051<br>60 | K.WSS(-<br>2.02)PPVCLPCTVNVVDMNR.N                    | Y | 54,<br>73 | 2307<br>,012<br>2 | 20 | 4,<br>5      | 770,<br>0148      | 3<br>7,<br>8 | 1,49E+0<br>6 | 1,19E+0<br>6 | 5,25E+0<br>6 | 38               | F38:<br>234<br>0 | 444              | 463                                                                                                              | xy:8.14<br>S3:2-<br>amino-3-<br>oxo-<br>butanoic_<br>acid:11.06                         |                                                                            |
| 2 | 3 | P051<br>60 | K.W(+15.99)SSPPVCLPCT(-<br>2.02)VNVVDMNR.N            | Y | 54,<br>33 | 2323<br>,007<br>1 | 20 | 0,<br>5      | 1162<br>,511<br>4 | 3<br>6,<br>8 | 1,57E+06     | 0,00E+0<br>0 | 1            | F1:3<br>094      | 444              | 463              | W1:Oxidat<br>ion<br>(HW):0.00;<br>T12:2-<br>amino-3-<br>oxo-<br>butanoic_<br>acid:31.37                          |                                                                                         |                                                                            |
| 2 | 3 | P051<br>60 | K.WSSPPVCLPCT(+31.99)T(-<br>2.02)VNVVDMNR.N           | Y | 53,<br>3  | 2339<br>,002      | 20 | -<br>0,<br>7 | 1170<br>,507<br>4 | 3<br>8,<br>4 | 1,06E+06     | 1,11E+0<br>6 | 1,65E+<br>06 | 74               | F74:<br>237<br>9 | 444              | 463                                                                                                              | C11:Dihydr<br>oxy:3.56;T<br>12:2-<br>amino-3-<br>oxo-<br>butanoic_<br>acid:39.35        |                                                                            |
| 2 | 3 | P051<br>60 | K.W(+31.99)SSPPVCL(-<br>33.99)LEP(+31.99)CTVNVVDMNR.N | Y | 52,<br>23 | 2339<br>,019<br>8 | 20 | -<br>2,<br>2 | 1170<br>,514<br>6 | 3<br>7,<br>5 | 3,23E+06     | 1,03E+0<br>5 |              | 45               | F45:<br>207<br>6 | 444              | 463                                                                                                              | W1:Dihydr<br>oxy:5.08;C<br>7:Dehydro<br>alanine<br>(C):31.27;P<br>10:Dihydro<br>xy:0.00 |                                                                            |
| 2 | 3 | P051<br>60 | K.W(+43.99)SSPPVCL(-<br>33.99)LEPCTVNVVDMNR.N         | Y | 50,<br>7  | 2319<br>,03       | 20 | -<br>2,<br>1 | 1160<br>,519<br>9 | 3<br>8,<br>3 | 1,99E+<br>06 | 2,09E+0<br>5 | 1,88E+0<br>6 | 4,52E+0<br>6     | 65               | F65:<br>238<br>8 | 444                                                                                                              | 463                                                                                     | W1:Carbox<br>ylation<br>(DKW):85.<br>47;C7:Deh<br>ydroalanin<br>e (C):8.26 |
| 2 | 3 | P051<br>60 | K.WSS(-<br>2.02)PPVCLPCTVNVVDMNR(+15.99).<br>N        | Y | 48,<br>33 | 2323<br>,007<br>1 | 20 | 4,<br>9      | 775,<br>3468      | 3<br>6,<br>7 |              | 2,92E+0<br>6 | 56           | F56:<br>226<br>6 | 444              | 463              | S3:2-<br>amino-3-<br>oxo-<br>butanoic_<br>acid:0.00;R<br>20:Oxidati<br>on or<br>Hydroxylat<br>ion:0.00           |                                                                                         |                                                                            |
| 2 | 3 | P051<br>60 | K.WSSPP(+15.99)VC(-<br>33.99)LEP(+31.99)CTVNVVDMNR.N  | Y | 46,<br>69 | 2323<br>,024<br>9 | 20 | 2,<br>4      | 1162<br>,522<br>5 | 3<br>7,<br>6 | 7,62E+<br>06 |              | 26           | F26:<br>231<br>4 | 444              | 463              | P5:Oxidati<br>on or<br>Hydroxylat<br>ion:11.06;<br>C7:Dehydr<br>oalanine<br>(C):31.27;P<br>10:Dihydro<br>xy:0.00 |                                                                                         |                                                                            |
| 2 | 3 | P051<br>60 | K.WS(-<br>2.02)SPPVCLPCTVNVVDMNR.N                    | Y | 45,<br>77 | 2307<br>,012<br>2 | 20 | 5,<br>9      | 770,<br>0159      | 3<br>7,<br>4 | 7,28E+06     |              | 7            | F7:2<br>335      | 444              | 463              | S2:2-<br>amino-3-<br>oxo-<br>butanoic_<br>acid:0.00                                                              |                                                                                         |                                                                            |
| 2 | 3 | P051<br>60 | K.W(+31.99)SSPPVCLPCT(-<br>2.02)VNVVDMNR.N            | Y | 44,<br>33 | 2339<br>,002      | 20 | 8,<br>2      | 1170<br>,517<br>8 | 3<br>6,<br>7 | 1,74E+06     |              | 7            | F7:2<br>277      | 444              | 463              | W1:Dihydr<br>oxy:12.33;<br>T12:2-<br>amino-3-<br>oxo-<br>butanoic_<br>acid:34.96                                 |                                                                                         |                                                                            |
| 2 | 3 | P051<br>60 | K.WSSPP(+15.99)VCLPCT(-<br>2.02)VNVVDMNR.N            | Y | 36,<br>76 | 2323<br>,007<br>1 | 20 | 1,<br>6      | 1162<br>,512<br>7 | 3<br>7,<br>2 |              | 0,00E+0<br>0 | 56           | F56:<br>230<br>9 | 444              | 463              | P5:Oxidati<br>on or<br>Hydroxylat<br>ion:0.00;T<br>12:2-<br>amino-3-<br>oxo-<br>butanoic_<br>acid:18.77          |                                                                                         |                                                                            |
| 2 | 3 | P051<br>60 | K.WSSPPVCLPCT(+31.99)C(-<br>33.99)TVNVVDMNR.N         | Y | 35,<br>66 | 2307<br>,03       | 20 | 8,<br>2      | 1154<br>,531      | 2<br>5<br>0, | 0,00E+00     |              | 16           | F16:<br>316      | 444              | 463              | P10:Dihydr<br>oxy:0.00;C                                                                                         |                                                                                         |                                                                            |





|   |   |        |                                          |   |       |           |    |     |          |   |      |          |          |          |          |          |          |          |          |     |                                                  |                                                                                                |                                                                        |
|---|---|--------|------------------------------------------|---|-------|-----------|----|-----|----------|---|------|----------|----------|----------|----------|----------|----------|----------|----------|-----|--------------------------------------------------|------------------------------------------------------------------------------------------------|------------------------------------------------------------------------|
| 2 | 3 | P05160 | R.NNIEM(+15.99)KW(+13.98)K.Y             | Y | 44,98 | 1091,507  | 8  | 4,8 | 546,7634 | 2 | 27,5 | 2,48E+06 | 6,64E+05 | 7,81E+05 | 1,96E+06 | 6,20E+05 | 3,67E+06 | 79       | F79:1514 | 464 | 471                                              | Oxidation (M); Tryptophan oxidation to oxolactone                                              | MS:Oxidation (M):1000.00;W7:Tryptophan oxidation to oxolactone:1000.00 |
| 2 | 3 | P05160 | R.NNIEMKW(+15.99)K(+15.99)YEGK.V         | Y | 44,53 | 1570,745  | 12 | 5,1 | 786,3838 | 2 | 28,9 | 1,44E+06 |          | 4,67E+06 | 0,00E+00 | 7,94E+05 | 39       | F39:1620 | 464      | 475 | Oxidation (HW)                                   | W7:Oxidation (HW):1000.00;K8:Oxidation or Hydroxylation:0.00                                   |                                                                        |
| 2 | 3 | P05160 | R.NNIEM(+15.99)K(+42.01)W(+3.99)K YEGK.V | Y | 43,6  | 1600,7555 | 12 | 4,3 | 801,3885 | 2 | 27,4 | 1,04E+05 |          | 1,82E+05 | 1,42E+05 |          | 63       | F63:1513 | 464      | 475 | Oxidation (M); Tryptophan oxidation to kynurenin | MS:Oxidation (M):1000.00;K6:Acetylation (K):12.19;W7:Tryptophan oxidation to kynurenin:1000.00 |                                                                        |
| 2 | 3 | P05160 | R.N(+15.99)NIEM(+15.99)K.W               | Y | 42,91 | 779,3483  | 6  | 0,6 | 390,6817 | 2 | 16,2 | 2,76E+05 | 0,00E+00 |          |          |          | 6        | F6:1313  | 464      | 469 | Oxidation (M)                                    | N1:Oxidation or Hydroxylation:17.01;MS:Oxidation (M):1000.00                                   |                                                                        |
| 2 | 3 | P05160 | R.NNIEM(+31.99)KWYEGK.V                  | Y | 41,79 | 1570,745  | 12 | 4,4 | 786,3832 | 2 | 29,1 | 0,00E+00 | 1,49E+06 |          |          |          | 42       | F42:1605 | 464      | 475 | Dioxidation (M)                                  | MS:Dioxidation (M):1000.00                                                                     |                                                                        |
| 2 | 3 | P05160 | R.NNIEM(+31.99)KW(+15.99)KYEGK.V         | Y | 40,87 | 1586,7399 | 12 | 2,4 | 794,3792 | 2 | 27,2 |          | 4,41E+06 |          |          | 9,65E+05 | 54       | F54:1486 | 464      | 475 | Dioxidation (M); Oxidation (HW)                  | MS:Dioxidation (M):1000.00;W7:Oxidation (HW):1000.00                                           |                                                                        |
| 2 | 3 | P05160 | R.NNIEMK(+42.01)W(+3.99)KYEGK.V          | Y | 39,38 | 1584,7606 | 12 | 9,5 | 793,3951 | 2 | 29,6 | 0,00E+00 |          |          | 0,00E+00 |          | 41       | F41:1636 | 464      | 475 | Tryptophan oxidation to kynurenin                | K6:Acetylation (K):0.00;W7:Tryptophan oxidation to kynurenin:1000.00                           |                                                                        |
| 2 | 3 | P05160 | R.NNIEM(+15.99)KW(+15.99).Y              | Y | 38,7  | 1093,5226 | 8  | 4,6 | 547,7711 | 2 | 27,8 |          | 1,77E+04 |          | 4,84E+04 |          | 70       | F70:1532 | 464      | 471 | Oxidation (M)                                    | MS:Oxidation (M):1000.00;K8:Oxidation or Hydroxylation:15.73                                   |                                                                        |
| 2 | 3 | P05160 | R.NNIEMKWY(+15.99)EGK.V                  | Y | 37,43 | 1554,75   | 12 | 10  | 778,3904 | 2 | 29   | 6,38E+04 |          |          |          |          | 42       | F42:1596 | 464      | 475 |                                                  | Y9:Oxidation or Hydroxylation:0.00                                                             |                                                                        |
| 2 | 3 | P05160 | R.NNIEM(+31.99)K.W                       | Y | 37,23 | 779,3483  | 6  | 8,4 | 780,3621 | 1 | 13,2 | 1,46E+05 | 3,65E+05 |          |          |          | 3        | F3:1052  | 464      | 469 | Dioxidation (M)                                  | MS:Dioxidation (M):1000.00                                                                     |                                                                        |

|   |   |        |                                            |   |       |           |    |     |           |   |      |          |          |          |          |          |     |                                           |                                                                                        |                                                                    |
|---|---|--------|--------------------------------------------|---|-------|-----------|----|-----|-----------|---|------|----------|----------|----------|----------|----------|-----|-------------------------------------------|----------------------------------------------------------------------------------------|--------------------------------------------------------------------|
| 2 | 3 | P05160 | R.NNIEM(+15.99)KW(+15.99)K(+15.99)YEGK.V   | Y | 35,57 | 1586,7399 | 12 | 3,1 | 794,3797  | 2 | 27,1 | 1,61E+06 | 9,19E+05 | 50       | F50:1470 | 464      | 475 | Oxidation (M); Oxidation (HW)             | M5:Oxidation (M):1000.00;W7:Oxidation (HW):1000.00;K8:Oxidation or Hydroxylation:22.87 |                                                                    |
| 2 | 3 | P05160 | R.NNIEMK(+42.01)W(+19.99)KYEK.V            | Y | 35,22 | 1600,7555 | 12 | 6,5 | 801,3903  | 2 | 27,6 | 1,48E+05 |          | 44       | F44:1513 | 464      | 475 | Tryptophan oxidation to hydroxytryptophan | K6:Acetylation (K):32.28; W7:Tryptophan oxidation to hydroxytryptophan:1000.00         |                                                                    |
| 2 | 3 | P05160 | K.WKYEK.V                                  | Y | 54,8  | 809,4072  | 6  | 1,9 | 405,7116  | 2 | 18,6 | 5,44E+06 | 3,07E+06 | 7,09E+06 | 22       | F22:1479 | 470 | 475                                       |                                                                                        |                                                                    |
| 2 | 3 | P05160 | K.WK(+15.99)YEGK.V                         | Y | 38,54 | 825,4021  | 6  | 4,3 | 413,7101  | 2 | 25,9 |          |          | 1,81E+04 | 77       | F77:1402 | 470 | 475                                       | K2:Oxidation or Hydroxylation:13.27                                                    |                                                                    |
| 2 | 3 | P05160 | K.YEGKVLHGDLD.F                            | Y | 60,99 | 1357,6877 | 12 | 7   | 679,8559  | 2 | 29   |          |          | 7,83E+06 | 20       | F20:2386 | 472 | 483                                       |                                                                                        |                                                                    |
| 2 | 3 | P05160 | K.YEGKVLHGDLI                              | Y | 39,79 | 1129,5768 | 10 | 6,3 | 377,5352  | 3 | 27,3 |          |          | 1,33E+06 | 21       | F21:2233 | 472 | 481                                       |                                                                                        |                                                                    |
| 2 | 3 | P05160 | K.VLHGDLDLDFVC(+31.99)K.Q                  | Y | 52,53 | 1387,6805 | 12 | 5   | 694,851   | 2 | 36,3 | 8,45E+05 | 9,12E+05 |          | 2        | F2:2952  | 476 | 487                                       | C11:Dehydroxy:80.00                                                                    |                                                                    |
| 2 | 3 | P05160 | K.VLHGDLDLDFVCK(+43.01)QGYDLSPL            | Y | 44,68 | 2161,0513 | 19 | 8   | 1081,5415 | 2 | 46   | 1,44E+07 | 1,07E+07 | 7,97E+05 | 17       | F17:2022 | 476 | 494                                       | K12:Carbamylation:148.71                                                               |                                                                    |
| 2 | 3 | P05160 | K.VLHGDLDLDFVCK(+27.99)QGY.D               | Y | 42,2  | 1733,8446 | 15 | 14  | 867,9414  | 2 | 36   |          | 1,18E+07 | 9,93E+05 | 57       | F57:2013 | 476 | 490                                       | K12:Formylation:118.56                                                                 |                                                                    |
| 2 | 3 | P05160 | K.VLHGDLDL.F                               | Y | 40,5  | 880,4654  | 8  | 5,4 | 441,2423  | 2 | 28,9 | 2,61E+06 | 1,25E+07 |          | 21       | F21:2383 | 476 | 483                                       |                                                                                        |                                                                    |
| 2 | 3 | P05160 | K.VLHGDLDLDFVCK(-1.03)QGYDLSPLTPELSVQCNR.G | Y | 38,39 | 3557,7534 | 32 | 5,3 | 1186,9314 | 3 | 41,1 | 3,90E+05 |          |          | 36       | F36:2585 | 476 | 507                                       | Lysine oxidation to amino adipic semialdehyde                                          | K12:Lysine oxidation to amino adipic semialdehyde:1000.00          |
| 2 | 3 | P05160 | K.VLHGDLDLDFVCKQGY.D                       | Y | 38,14 | 1705,8497 | 15 | 12  | 853,942   | 2 | 38   | 0,00E+00 |          |          | 17       | F17:1951 | 476 | 490                                       |                                                                                        |                                                                    |
| 2 | 3 | P05160 | K.VLHGDLDLDFVCK(-1.03)QGYDLSPLT.P.L        | Y | 36,54 | 2428,1985 | 22 | 2,7 | 810,409   | 3 | 37,1 | 1,13E+07 |          |          | 18       | F18:2257 | 476 | 497                                       | Lysine oxidation to amino adipic semialdehyde                                          | K12:Lysine oxidation to amino adipic semialdehyde:1000.00          |
| 2 | 3 | P05160 | K.QGYDLSPLTPELSVQC(-33.99)NRGEVK(+14.96).Y | Y | 56,73 | 2613,2922 | 24 | 9,4 | 872,0965  | 3 | 38,1 | 1,02E+07 | 1,02E+07 | 8,57E+06 | 44       | F44:2363 | 488 | 511                                       | Dehydroalanine (C); Alpha-amino adipic acid                                            | C18:Dehydroalanine (C):1000.00;K24:Alpha-amino adipic acid:1000.00 |
| 2 | 3 | P051   | K.QGYDLSPLTPELS                            | Y | 53,   | 1531      | 14 | 6,  | 766,      | 2 | 3    | 6,87E+05 |          |          | 2        | F2:3     | 488 | 501                                       |                                                                                        |                                                                    |





|    |    |        |                                             |   |       |           |    |     |          |   |       |          |          |          |          |          |          |          |          |          |          |          |      |                                                                                                                                |  |
|----|----|--------|---------------------------------------------|---|-------|-----------|----|-----|----------|---|-------|----------|----------|----------|----------|----------|----------|----------|----------|----------|----------|----------|------|--------------------------------------------------------------------------------------------------------------------------------|--|
| 2  | 3  | P05160 | R.GDTY(+33.96)PAELYITGSILR.M                | Y | 87,27 | 1801,8652 | 16 | 6,7 | 901,9459 | 2 | 40,01 |          |          |          |          |          |          |          | 4,71E+06 | 77       | F77:2529 | 618      | 633  | Y4:Chlorination of tyrosine residues:53.98                                                                                     |  |
| 2  | 3  | P05160 | R.GDT[-2.02]Y(+31.99)P[-30.01]AELYITGSILR.M | Y | 53,02 | 1767,8679 | 16 | 5   | 884,9457 | 2 | 47,77 |          | 0,00E+00 |          | 0,00E+00 | 0,00E+00 |          |          |          | 77       | F77:3034 | 618      | 633  | Proline oxidation to pyrrolidone<br>Y4:Chlorination of tyrosine residues:1000.00                                               |  |
| 2  | 3  | P05160 | R.GDTY(+33.96)PAELY(+33.96)ITGSILR.M        | Y | 47,97 | 1835,8263 | 16 | 10  | 918,9296 | 2 | 37,77 | 0,00E+00 |          |          |          |          |          |          |          | 3        | F3:3074  | 618      | 633  | Chlorination of tyrosine residues<br>Y4:Chlorination of tyrosine residues:1000.00;Y9:Chlorination of tyrosine residues:1000.00 |  |
| 2  | 3  | P05160 | T.YPAELYITGSILR.M                           | Y | 84,41 | 1494,8082 | 13 | 4,6 | 748,4148 | 2 | 39,2  |          | 4,12E+06 | 5,03E+06 | 2,99E+06 | 8,13E+06 | 1,28E+07 | 1,67E+06 | 1,10E+07 | 5,66E+06 | 50       | F50:2417 | 621  | 633                                                                                                                            |  |
| 2  | 3  | P05160 | Y.PAELYITGSILR.M                            | Y | 85,89 | 1331,7449 | 12 | 5,5 | 666,8834 | 2 | 39,1  | 1,96E+07 | 3,37E+07 | 3,80E+07 | 5,07E+07 | 7,87E+07 | 9,42E+07 | 6,63E+07 | 9,61E+07 | 6,69E+07 | 46       | F46:2434 | 622  | 633                                                                                                                            |  |
| 2  | 3  | P05160 | E.LYITGSILR.M                               | Y | 66,05 | 1034,6124 | 9  | 1,4 | 518,3142 | 2 | 35,4  | 3,06E+07 | 4,14E+07 | 1,91E+07 |          |          |          |          |          |          | 1        | F1:2965  | 625  | 633                                                                                                                            |  |
| 2  | 3  | P05160 | L.YITGSILR.M                                | Y | 53,99 | 921,5283  | 8  | 4,1 | 461,7733 | 2 | 29,5  |          | 2,58E+05 | 1,39E+07 |          |          |          |          |          |          | 20       | F20:2434 | 626  | 633                                                                                                                            |  |
| 2  | 3  | P05160 | R.GQLKYPR.C                                 | Y | 56,76 | 860,4868  | 7  | 1,2 | 431,2512 | 2 | 23,3  | 5,22E+06 | 5,80E+06 | 4,75E+06 |          |          |          |          |          |          | 13       | F13:1810 | 639  | 645                                                                                                                            |  |
| 2  | 3  | P05160 | R.QSTLSYQEPLRT                              | Y | 69,67 | 1421,7151 | 12 | 4,6 | 711,8681 | 2 | 29,4  | 3,25E+07 | 2,90E+07 | 1,46E+06 |          |          |          |          |          |          | 2        | F2:2395  | 650  | 661                                                                                                                            |  |
| 2  | 3  | P05160 | R.QSTLSYQEPLR.T                             | Y | 67,6  | 1320,6674 | 11 | 5,9 | 661,3448 | 2 | 29,5  | 3,22E+07 | 3,47E+07 |          | 2,55E+07 | 7,12E+06 | 4,30E+06 | 2,32E+07 | 5,53E+06 | 1,21E+07 | 12       | F12:2390 | 650  | 660                                                                                                                            |  |
| 2  | 3  | P05160 | R.QSTLSYQEPLR                               | Y | 46,91 | 1164,5663 | 10 | 7,4 | 583,2947 | 2 | 13,3  | 1,00E+06 | 4,62E+05 |          |          |          |          |          |          |          | 2        | F2:2553  | 650  | 659                                                                                                                            |  |
| 2  | 3  | P05160 | L.SYQEPLRT                                  | Y | 44,53 | 992,4927  | 8  | 5,6 | 497,2564 | 2 | 26,9  | 7,81E+06 | 6,95E+06 | 3,94E+07 |          |          |          |          |          |          | 11       | F11:2167 | 654  | 661                                                                                                                            |  |
| 2  | 3  | P05160 | L.SYQEPLR.T                                 | Y | 41    | 891,445   | 7  | 1,8 | 446,7306 | 2 | 28,2  | 5,98E+06 | 7,64E+06 | 3,42E+06 |          |          |          |          |          |          | 10       | F10:2279 | 654  | 660                                                                                                                            |  |
| 55 | 24 | P07996 | R.FVFGTTPEDILR.N                            | Y | 66,98 | 1393,7241 | 12 | 5,2 | 697,873  | 2 | 34,8  |          |          | 2,88E+06 |          |          |          |          |          |          | 21       | F21:2887 | 217  | 228                                                                                                                            |  |
| 55 | 24 | P07996 | K.GTGSQNDPNWVVR.H                           | Y | 57,45 | 1371,6531 | 12 | 2,9 | 686,8358 | 2 | 30,8  |          |          | 2,00E+06 |          |          |          |          |          |          | 19       | F19:2632 | 969  | 980                                                                                                                            |  |
| 55 | 24 | P07996 | K.FQDLVDAVR.A                               | Y | 56,81 | 1061,5505 | 9  | 5,6 | 531,7855 | 2 | 30,8  |          |          | 2,56E+06 |          |          |          |          |          |          | 20       | F20:2544 | 75   | 83                                                                                                                             |  |
| 55 | 24 | P07996 | K.GPDPSPAFR.I                               | Y | 54,48 | 1029,4879 | 10 | 6,6 | 515,7546 | 2 | 26,4  |          |          | 2,21E+06 |          |          |          |          |          |          | 20       | F20:2143 | 51   | 60                                                                                                                             |  |
| 55 | 24 | P07996 | R.AQGYSGLSVK.V                              | Y | 47,5  | 1008,524  | 10 | 5,1 | 505,2718 | 2 | 26,9  |          |          | 1,56E+06 |          |          |          |          |          |          | 21       | F21:2193 | 1055 | 1064                                                                                                                           |  |
| 9  | 6  | P08603 | K.HGGLYHENMR.R                              | Y | 92,34 | 1212,545  | 10 | -0, | 607,2796 | 2 | 18,   | 6,24E+06 | 7,98E+05 | 2,49E+06 |          |          |          |          |          |          | 24       | F24:146  | 332  | 341                                                                                                                            |  |

|   |   |        |                             |   |       |           |    |     |           |   |       |          |          |          |          |          |          |          |          |          |         |                 |                            |                          |  |
|---|---|--------|-----------------------------|---|-------|-----------|----|-----|-----------|---|-------|----------|----------|----------|----------|----------|----------|----------|----------|----------|---------|-----------------|----------------------------|--------------------------|--|
| 9 | 6 | P08603 | R.NTEILTGSWSDQTYPEGTQAIYK.C | Y | 88,67 | 2601,2234 | 23 | 1,7 | 1301,6167 | 2 | 3,4,3 | 0        | 0        | 2,82E+06 |          | 0        | 0        | 13       | F13:2953 | 29       | 51      |                 |                            |                          |  |
| 9 | 6 | P08603 | K.SSNLIJLEHLK.N             | Y | 83,52 | 1394,7769 | 12 | 7,2 | 698,4008  | 2 | 3,2,3 | 4,94E+06 | 3,85E+06 | 1,92E+06 |          |          |          | 2        | F2:2635  | 755      | 766     |                 |                            |                          |  |
| 9 | 6 | P08603 | K.SPDVINGSPISQK.I           | Y | 80,43 | 1340,6936 | 13 | 1,7 | 671,3552  | 2 | 3,1,1 | 8,93E+06 | 1,10E+07 | 1,30E+07 | 1,05E+06 | 0        | 6,72E+05 | 7,33E+05 | 0        | 1,15E+04 | 1       | F1:2558         | 212                        | 224                      |  |
| 9 | 6 | P08603 | R.SSQESYAHGTK.L             | Y | 78,81 | 1193,5312 | 11 | -3  | 597,7711  | 2 | 1,1,9 | 1,73E+06 | 7,84E+05 | 9,83E+05 |          |          |          | 24       | F2:872   | 886      | 896     |                 |                            |                          |  |
| 9 | 6 | P08603 | R.KGEWVALNPLR.K             | Y | 77,51 | 1281,7194 | 11 | 0,6 | 641,8666  | 2 | 3,2,3 | 7,60E+05 | 1,58E+06 | 9,88E+04 | 1,92E+06 | 1,20E+06 | 1,49E+06 | 2,33E+06 | 1,40E+06 | 1,16E+06 | 15      | F15:2824        | 68                         | 78                       |  |
| 9 | 6 | P08603 | K.IDVHLPDR.K                | Y | 72,3  | 1062,5822 | 9  | 1,2 | 532,299   | 2 | 3,0,2 | 6,05E+06 | 3,72E+06 | 2,33E+06 |          |          |          | 22       | F22:2590 | 574      | 582     |                 |                            |                          |  |
| 9 | 6 | P08603 | K.IVSSAM(+15.99)EPDR.E      | Y | 69,81 | 1119,5229 | 10 | 5,1 | 560,7716  | 2 | 2,4,4 | 3,60E+06 | 5,16E+06 |          |          |          |          | 2        | F2:1963  | 157      | 166     | Oxidation (M)   | M6:Oxidation (M):1000.00   |                          |  |
| 9 | 6 | P08603 | K.HGGLYHENM(+15.99)R.R      | Y | 69,54 | 1228,5408 | 10 | 1,8 | 615,2787  | 2 | 1,3,6 | 1,19E+06 | 2,35E+06 | 1,13E+05 |          |          | 2,64E+04 |          | 6        | F6:1059  | 332     | 341             | Oxidation (M)              | M9:Oxidation (M):1000.00 |  |
| 9 | 6 | P08603 | H.MSDSYQYGEVITYK.C          | Y | 68,86 | 1698,7083 | 14 | 0,3 | 850,3611  | 2 | 2,9,7 | 0        | 0        | 0        |          |          |          | 24       | F24:2559 | 945      | 958     |                 |                            |                          |  |
| 9 | 6 | P08603 | K.EFDHNSNIR.Y               | Y | 67,75 | 1130,5105 | 9  | 0,3 | 566,2623  | 2 | 0,0,9 | 3,96E+06 | 2,99E+06 | 3,37E+06 |          |          |          | 24       | F24:1710 | 770      | 778     |                 |                            |                          |  |
| 9 | 6 | P08603 | R.NGQWSEPPK.C               | N | 67,11 | 1041,4879 | 9  | 4,1 | 521,7534  | 2 | 8,8,3 | 6,35E+05 | 7,19E+05 | 2,66E+05 |          |          |          | 1        | F1:2285  | 1154     | 1162    |                 |                            |                          |  |
| 9 | 6 | P08603 | R.EIMENYNIALR.W             | N | 67,05 | 1364,6758 | 11 | 0,9 | 683,3445  | 2 | 2,2,8 | 0        | 1,49E+06 | 2,48E+06 |          |          |          | 13       | F13:2818 | 1172     | 1182    |                 |                            |                          |  |
| 9 | 6 | P08603 | R.EYHFGQAVR.F               | Y | 65,43 | 1105,5305 | 9  | 6,7 | 553,7762  | 2 | 2,7,8 | 0        | 2,02E+06 |          |          |          |          | 12       | F12:2241 | 167      | 175     |                 |                            |                          |  |
| 9 | 6 | P08603 | R.RPYFPVAVGK.Y              | Y | 64,98 | 1132,6393 | 10 | 2,9 | 567,3286  | 2 | 2,2,8 | 5,70E+06 | 1,00E+07 |          | 2,64E+05 | 2,80E+05 | 1,21E+06 | 2,60E+05 | 1,56E+06 | 1        | F1:2731 | 342             | 351                        |                          |  |
| 9 | 6 | P08603 | R.NGFYPATR.G                | Y | 63,31 | 924,4453  | 8  | 0,2 | 463,2298  | 2 | 2,8   | 5,64E+06 | 2,80E+06 | 2,59E+06 |          |          |          | 15       | F15:2414 | 296      | 303     |                 |                            |                          |  |
| 9 | 6 | P08603 | K.IVSSAM(+31.99)EPDR.E      | Y | 61,46 | 1135,5179 | 10 | 7,6 | 568,7706  | 2 | 2,4,8 | 8,44E+05 | 7,26E+05 |          |          |          |          | 2        | F2:1996  | 157      | 166     | Dioxidation (M) | M6:Dioxidation (M):1000.00 |                          |  |
| 9 | 6 | P08603 | E.GFGIDGPAIAK.C             | Y | 61,11 | 1044,5603 | 11 | 2,4 | 523,2887  | 2 | 3,3,2 | 3,87E+06 | 4,14E+06 | 2,44E+06 |          |          |          | 10       | F10:2759 | 962      | 972     |                 |                            |                          |  |
| 9 | 6 | P08603 | K.IVSSAMEPDRE.Y             | Y | 61    | 1232,5707 | 11 | 3,1 | 617,2946  | 2 | 8,8,8 | 7,46E+05 | 3,68E+06 |          |          |          |          | 10       | F10:2338 | 157      | 167     |                 |                            |                          |  |
| 9 | 6 | P08603 | K.IVSSAMEPDREYHFGQAVR.F     | Y | 59,07 | 2191,0481 | 19 | 2,5 | 731,3585  | 3 | 3,3,0 | 2,35E+06 | 7,11E+06 | 0        |          |          |          | 15       | F15:2610 | 157      | 175     |                 |                            |                          |  |
| 9 | 6 | P08603 | K.HGGLYHEN.M                | Y | 57,34 | 925,4042  | 8  | 5,2 | 463,7118  | 2 | 2,3,4 | 7,54E+04 | 2,32E+05 |          |          |          |          | 12       | F12:1859 | 332      | 339     |                 |                            |                          |  |
| 9 | 6 | P08603 | R.KGEWVALNPLR.K.C           | Y | 57,21 | 1409,8142 | 12 | -2  | 470,9444  | 3 | 0,0,7 | 0        |          |          |          |          |          | 6        | F6:2700  | 68       | 79      |                 |                            |                          |  |
| 9 | 6 | P08603 | E.SFTMIGH.R.S               | Y | 56,86 | 947,4647  | 8  | 2,6 | 474,7408  | 2 | 0,0,7 | 1,74E+06 | 1,90E+06 |          |          |          |          | 1        | F1:2519  | 722      | 729     |                 |                            |                          |  |
| 9 | 6 | P08603 | D.VHLPDR.K                  | Y | 56,78 | 834,4712  | 7  | 1,9 | 418,2437  | 2 | 2,8,9 | 6,58E+05 | 1,06E+06 |          |          |          |          | 10       | F10:2345 | 576      | 582     |                 |                            |                          |  |

|   |   |        |                                   |   |       |           |    |     |          |   |       |          |          |          |    |          |      |      |                                                 |                                                             |
|---|---|--------|-----------------------------------|---|-------|-----------|----|-----|----------|---|-------|----------|----------|----------|----|----------|------|------|-------------------------------------------------|-------------------------------------------------------------|
| 9 | 6 | P08603 | R.TKNDFTWFK.L                     | Y | 56,74 | 1185,5818 | 9  | 3,1 | 593,8    | 2 | 3,4,4 | 1,05E+06 |          |          | 1  | F1:2877  | 519  | 527  |                                                 |                                                             |
| 9 | 6 | P08603 | K.IVSSAM(+15.99)EPDRE.Y           | Y | 56,45 | 1248,5656 | 11 | 2,9 | 625,2919 | 2 | 2,6,6 | 1,15E+06 |          |          | 10 | F10:2135 | 157  | 167  | Oxidation (M)                                   | M6:Oxidation (M):1000.00                                    |
| 9 | 6 | P08603 | K.HGGLYHENM.R                     | Y | 54,42 | 1056,4447 | 9  | 2,2 | 529,2285 | 2 | 2,5,3 | 0        |          |          | 5  | F5:2177  | 332  | 340  |                                                 |                                                             |
| 9 | 6 | P08603 | K.GEWVALNPLR.K                    | Y | 53,49 | 1153,6244 | 10 | 2,8 | 577,8211 | 2 | 3,3,5 | 0        |          |          | 11 | F11:2723 | 69   | 78   |                                                 |                                                             |
| 9 | 6 | P08603 | K.IIYKENER.F                      | Y | 52,93 | 1063,5662 | 8  | 0,8 | 532,7899 | 2 | 8,8   | 1,26E+06 | 9,05E+04 | 9,16E+05 | 22 | F22:1504 | 225  | 232  |                                                 |                                                             |
| 9 | 6 | P08603 | K.HGGLYHE.N                       | Y | 51,14 | 811,3613  | 7  | 3,4 | 406,6893 | 2 | 2,6,2 | 1,37E+05 | 1,05E+06 |          | 10 | F10:2098 | 332  | 338  |                                                 |                                                             |
| 9 | 6 | P08603 | K.VGEVLK.F                        | Y | 46,37 | 643,3904  | 6  | 1,2 | 322,7021 | 2 | 4,3   | 9,72E+06 | 6,08E+06 | 5,00E+06 | 6  | F6:2072  | 589  | 594  |                                                 |                                                             |
| 9 | 6 | P08603 | E.FDHNSNIR.Y                      | Y | 46,11 | 1001,4679 | 8  | 2,4 | 501,7424 | 2 | 5,9   | 1,69E+05 | 1,82E+06 |          | 10 | F10:2066 | 771  | 778  |                                                 |                                                             |
| 9 | 6 | P08603 | E.YHFGQAVR.F                      | Y | 45,64 | 976,4879  | 8  | 2,3 | 489,2523 | 2 | 9,6   | 1,50E+06 | 1,64E+06 |          | 1  | F1:2411  | 168  | 175  |                                                 |                                                             |
| 9 | 6 | P08603 | R.CT(-2.02)LKPCDYPDIK.H           | Y | 44,82 | 1392,6417 | 12 | 2,6 | 697,3264 | 2 | 2,9,5 | 0        | 0        |          | 4  | F4:2581  | 320  | 331  |                                                 | T2:2-amino-3-oxo-butanoic_acid:38.00                        |
| 9 | 6 | P08603 | K.NDFTWFK.L                       | Y | 44,61 | 956,4392  | 7  | 0,7 | 479,2272 | 2 | 3,6   | 7,00E+05 |          |          | 1  | F1:3020  | 521  | 527  |                                                 |                                                             |
| 9 | 6 | P08603 | K.SPEISHGVVAH.M                   | Y | 44,39 | 1228,62   | 12 | 0,1 | 410,5473 | 3 | 7,1   | 0        |          |          | 5  | F5:2357  | 933  | 944  |                                                 |                                                             |
| 9 | 6 | P08603 | E.NYNIALR.W                       | N | 43,78 | 862,4661  | 7  | 2,7 | 432,2415 | 2 | 1,5   | 3,94E+06 | 4,13E+06 |          | 1  | F1:2600  | 1176 | 1182 |                                                 |                                                             |
| 9 | 6 | P08603 | E.GTQAIYK.C                       | Y | 43,54 | 779,4177  | 7  | 2,9 | 390,7173 | 2 | 2,7   | 1,74E+05 | 1,84E+06 |          | 1  | F1:2146  | 45   | 51   |                                                 |                                                             |
| 9 | 6 | P08603 | L.GEINYR.E                        | Y | 40,55 | 750,366   | 6  | 1,3 | 376,1898 | 2 | 1,3   |          | 4,09E+04 | 0        | 22 | F22:1726 | 122  | 127  |                                                 |                                                             |
| 9 | 6 | P08603 | E.WVALNPLR.K                      | Y | 39,97 | 967,5603  | 8  | 2,7 | 484,7887 | 2 | 5,2   | 2,29E+06 | 3,26E+06 |          | 10 | F10:2942 | 71   | 78   |                                                 |                                                             |
| 9 | 6 | P08603 | K.LGVVTADGE.T                     | Y | 39,91 | 923,4236  | 9  | 2   | 924,4327 | 1 | 0,7   |          | 1,92E+06 |          | 10 | F10:2524 | 479  | 487  |                                                 |                                                             |
| 9 | 6 | P08603 | K.DGWSAQPTCK(-1.03)SCDIPVFMNAR.T  | Y | 39,08 | 2437,0864 | 22 | 4,9 | 813,3734 | 3 | 3,5   | 0        |          |          | 5  | F5:3091  | 497  | 518  | Lysine oxidation to aminoaldehydic semialdehyde | K11:Lysine oxidation to aminoaldehydic semialdehyde:1000.00 |
| 9 | 6 | P08603 | K.WSSPPQCEGLPCK(-2.02).S          | Y | 38,05 | 1428,6166 | 13 | 1,6 | 715,3167 | 2 | 3,0,6 | 5,17E+06 | 1,39E+06 | 1,66E+06 | 14 | F14:2634 | 920  | 932  |                                                 | K13:2-amino-3-oxo-butanoic_acid:66.25                       |
| 9 | 6 | P08603 | K.FVQVK.S                         | Y | 36,89 | 577,3224  | 5  | 5,7 | 578,3329 | 1 | 3,5   | 4,87E+05 | 3,54E+05 |          | 1  | F1:1867  | 406  | 410  |                                                 |                                                             |
| 9 | 6 | P08603 | K.IVSSAMEPD(+15.99)REYHFGQAVR.F   | Y | 36,7  | 2207,043  | 19 | -9  | 736,6816 | 3 | 2,9   | 0        |          |          | 15 | F15:2513 | 157  | 175  |                                                 | D9:Oxidation or Hydroxylat ion:0.00                         |
| 9 | 6 | P086   | K.WSSPPQCEGLP(-30.01)CK(+27.99).S | Y | 34,   | 1428      | 13 | 1,  | 715,     | 2 | 3     | 1,69E+06 | 0        |          | 13 | F13:     | 920  | 932  |                                                 | P11:Prolin                                                  |







|    |    |        |                                              |   |       |           |    |     |          |   |      |          |    |          |      |      |                                                                          |                                                                                     |
|----|----|--------|----------------------------------------------|---|-------|-----------|----|-----|----------|---|------|----------|----|----------|------|------|--------------------------------------------------------------------------|-------------------------------------------------------------------------------------|
| 19 | 21 | P12259 | K.ASKPGWLLN(+98)TE.V                         | Y | 58,3  | 1401,6929 | 12 | 4,8 | 701,8571 | 2 | 37,8 | 4,99E+06 | 19 | F19:3296 | 1876 | 1887 | Deamidation (NQ)                                                         | N10:Deamidation (NQ):100.00                                                         |
| 19 | 21 | P12259 | Y.SLHAHGLSYEK.S                              | Y | 50,58 | 1240,62   | 11 | 6   | 414,5498 | 3 | 25,1 | 0        | 20 | F20:2014 | 1669 | 1679 |                                                                          |                                                                                     |
| 19 | 21 | P12259 | K.NFFNPPHISR.F                               | Y | 42,76 | 1203,64   | 10 | 5,8 | 602,8307 | 2 | 33,4 | 2,77E+06 | 21 | F21:2774 | 2190 | 2199 |                                                                          |                                                                                     |
| 19 | 21 | P12259 | K.DIHSGLIGPLLI                               | Y | 41,43 | 1133,6444 | 11 | 4,1 | 567,8318 | 2 | 36   | 7,86E+05 | 21 | F21:2979 | 1739 | 1749 |                                                                          |                                                                                     |
| 19 | 21 | P12259 | K.YLDSTFTK.R                                 | Y | 37,06 | 973,4756  | 8  | 7,3 | 487,7487 | 2 | 27,9 | 2,01E+06 | 20 | F20:2287 | 1623 | 1630 |                                                                          |                                                                                     |
| 19 | 21 | P12259 | S.SLTPK.H                                    | N | 28,48 | 544,322   | 5  | 4   | 273,1694 | 2 | 29,5 | 1,63E+05 | 11 | F11:1540 | 310  | 314  |                                                                          |                                                                                     |
| 64 | 51 | P13591 | E.ASGDPIPSTWR.T                              | Y | 51,28 | 1298,6619 | 12 | 3,2 | 650,3403 | 2 | 49   | 2,13E+06 | 19 | F19:3033 | 331  | 342  |                                                                          |                                                                                     |
| 64 | 51 | P13591 | K.VFAKPK.I                                   | Y | 35,57 | 688,4271  | 6  | 4,5 | 345,2224 | 2 | 22   | 1,98E+05 | 21 | F21:1736 | 304  | 309  |                                                                          |                                                                                     |
| 15 | 7  | P19823 | K.KFYNQVSTPLLR.N                             | Y | 84,46 | 1464,8088 | 12 | 2,1 | 733,4133 | 2 | 33,1 | 2,21E+07 | 19 | F19:2858 | 488  | 499  |                                                                          |                                                                                     |
| 15 | 7  | P19823 | K.IQPSGGTININEALLR.A                         | Y | 82,15 | 1581,8474 | 15 | 8,9 | 791,938  | 2 | 0,3  | 3,46E+07 | 20 | F20:2506 | 380  | 394  |                                                                          |                                                                                     |
| 15 | 7  | P19823 | L.IILVSDGDPVTELK.L                           | Y | 78,54 | 1554,8505 | 15 | 7,4 | 778,4382 | 2 | 2,5  | 3,88E+06 | 20 | F20:2696 | 416  | 430  |                                                                          |                                                                                     |
| 15 | 7  | P19823 | K.LIWAYLTINQLLAER.S                          | Y | 76,02 | 1702,9406 | 14 | 6,9 | 852,4835 | 2 | 38   | 1,14E+06 | 20 | F20:3128 | 583  | 596  |                                                                          |                                                                                     |
| 15 | 7  | P19823 | K.FYNQVSTPLLR.N                              | Y | 73,82 | 1336,7139 | 11 | 1,5 | 669,3652 | 2 | 39   | 1,90E+08 | 19 | F19:2934 | 489  | 499  |                                                                          |                                                                                     |
| 15 | 7  | P19823 | R.KLGSYEHR.I                                 | Y | 63,5  | 988,509   | 8  | 3,8 | 495,2636 | 2 | 1,2  | 1,84E+07 | 20 | F20:1672 | 190  | 197  |                                                                          |                                                                                     |
| 15 | 7  | P19823 | K.VQFELHYQEVK.W                              | Y | 61,91 | 1418,7194 | 11 | 9,1 | 710,3734 | 2 | 9,6  | 6,35E+07 | 20 | F20:2440 | 177  | 187  |                                                                          |                                                                                     |
| 15 | 7  | P19823 | L.VIENEAGDER.M                               | Y | 59,14 | 1130,5204 | 10 | 2,7 | 566,269  | 2 | 3,2  | 2,06E+07 | 20 | F20:1834 | 629  | 638  |                                                                          |                                                                                     |
| 15 | 7  | P19823 | R.KLIWAYLTINQLLAER                           | Y | 58,71 | 1674,9344 | 14 | 5,2 | 838,4789 | 2 | 0,9  | 3,99E+06 | 19 | F19:3544 | 582  | 595  |                                                                          |                                                                                     |
| 15 | 7  | P19823 | K.LGSYEHR.J                                  | Y | 58,55 | 860,4141  | 7  | 4,7 | 431,2163 | 2 | 0,1  | 7,74E+06 | 20 | F20:1580 | 191  | 197  |                                                                          |                                                                                     |
| 15 | 7  | P19823 | K.MKQTV EAMK.T                               | Y | 58,44 | 1064,5359 | 9  | 7,2 | 533,2791 | 2 | 4,1  | 1,93E+06 | 20 | F20:1916 | 326  | 334  |                                                                          |                                                                                     |
| 15 | 7  | P19823 | K.IQPSGGTININE.A                             | Y | 56,6  | 1128,5411 | 11 | 5,5 | 565,2809 | 2 | 6,1  | 9,92E+06 | 20 | F20:2112 | 380  | 390  |                                                                          |                                                                                     |
| 15 | 7  | P19823 | K.TQVADAK.R                                  | Y | 55,91 | 731,3813  | 7  | 3,7 | 732,3913 | 1 | 8,2  | 4,46E+05 | 19 | F19:1448 | 368  | 374  |                                                                          |                                                                                     |
| 15 | 7  | P19823 | K.NILFVIDVSGSM(-48.00)W(+19.99)GVK(+42.01).M | Y | 54,66 | 1777,925  | 16 | 13  | 889,9818 | 2 | 66,3 | 1,65E+06 | 19 | F19:5611 | 310  | 325  | Dethiomethyl; Tryptophan oxidation to hydroxyky nurenin; Acetylation (K) | M12:Dethiomethyl:1000.00;W13:Tryptophan oxidation to hydroxyky nurenin:1000.00;K16: |



|    |    |            |                                              |   |           |                   |    |              |              |   |              |              |    |                  |     |     |                                                                                            |
|----|----|------------|----------------------------------------------|---|-----------|-------------------|----|--------------|--------------|---|--------------|--------------|----|------------------|-----|-----|--------------------------------------------------------------------------------------------|
| 15 | 7  | P198<br>23 | W.AYLTIQLLAER.S                              | Y | 35,<br>36 | 1403<br>,777<br>2 | 12 | 6,<br>6      | 702,<br>9005 | 2 | 3<br>4,<br>6 | 3,00E+<br>05 | 21 | F21:<br>287<br>3 | 585 | 596 |                                                                                            |
| 15 | 7  | P198<br>23 | E.VFNGYFVHFFAPD(+15.99)N(+15.99)<br>LDPIPK.N | Y | 33,<br>59 | 2368<br>,152<br>8 | 20 | -<br>4,<br>5 | 790,<br>388  | 3 | 3<br>9,<br>4 | 8,26E+<br>05 | 19 | F19:<br>342<br>6 | 290 | 309 | D13:Oxidation or Hydroxylation:8.65N14:Oxidation or Hydroxylation:5.99                     |
| 15 | 7  | P198<br>23 | S.FKPTVAQQR.I                                | Y | 32,<br>66 | 1073<br>,598<br>1 | 9  | 3,<br>4      | 537,<br>8082 | 2 | 2<br>7       | 1,50E+<br>06 | 19 | F19:<br>222<br>7 | 251 | 259 |                                                                                            |
| 15 | 7  | P198<br>23 | K.DKHADP(-27.99)DFTRK.L                      | Y | 31,<br>22 | 1300<br>,652<br>3 | 11 | -<br>5,<br>7 | 651,<br>3297 | 2 | 2<br>5,<br>2 | 1,07E+<br>07 | 19 | F19:<br>204<br>1 | 572 | 582 | Pyrrolidone from Proline                                                                   |
| 15 | 7  | P198<br>23 | H.FFAP(+31.99)D(+15.99)NLDPIPK.N             | Y | 31,<br>21 | 1420<br>,687<br>4 | 12 | -<br>5,<br>7 | 711,<br>3469 | 2 | 3<br>0,<br>6 | 1,35E+<br>07 | 20 | F20:<br>253<br>0 | 298 | 309 | P4:Dihydroxy:34.83;D5:Oxidation or Hydroxylation:12.28                                     |
| 15 | 7  | P198<br>23 | R.KLGSYE.H                                   | Y | 30,<br>45 | 695,<br>349       | 6  | 2,<br>4      | 696,<br>358  | 1 | 2<br>6,<br>3 | 1,24E+<br>07 | 19 | F19:<br>215<br>5 | 190 | 195 |                                                                                            |
| 15 | 7  | P198<br>23 | E.GHFDGVP(-30.01)VISK(+15.99).G              | Y | 29,<br>87 | 1140<br>,592<br>8 | 11 | 1,<br>8      | 571,<br>3047 | 2 | 3<br>0,<br>8 | 3,62E+<br>06 | 19 | F19:<br>262<br>3 | 232 | 242 | Proline oxidation to pyrrolidone                                                           |
| 15 | 7  | P198<br>23 | F.DVQIPK.G                                   | Y | 29,<br>77 | 698,<br>3962      | 6  | 4,<br>4      | 699,<br>4066 | 1 | 2<br>6,<br>6 | 5,52E+<br>07 | 21 | F21:<br>216<br>8 | 107 | 112 |                                                                                            |
| 15 | 7  | P198<br>23 | H.FFAP(+31.99)DN(+15.99)LDPIPK.N             | Y | 28,<br>28 | 1420<br>,687<br>4 | 12 | -<br>7,<br>5 | 711,<br>3456 | 2 | 3<br>0,<br>6 | 1,25E+<br>07 | 21 | F21:<br>253<br>9 | 298 | 309 | P4:Dihydroxy:23.70;N6:Oxidation or Hydroxylation:0.00                                      |
| 15 | 7  | P198<br>23 | K.LWAYLT.I                                   | N | 28,<br>1  | 765,<br>4061      | 6  | 3,<br>9      | 766,<br>4164 | 1 | 3<br>6,<br>7 | 1,81E+<br>06 | 19 | F19:<br>319<br>0 | 583 | 588 |                                                                                            |
| 15 | 7  | P198<br>23 | E.IVVAGK.F                                   | Y | 26,<br>68 | 585,<br>3849      | 6  | 5,<br>3      | 586,<br>3953 | 1 | 2<br>3,<br>2 | 2,99E+<br>07 | 20 | F20:<br>183<br>5 | 527 | 532 |                                                                                            |
| 15 | 7  | P198<br>23 | Q.N(+.98)VVFVQVQIPK.G                        | Y | 26,<br>62 | 1158<br>,628<br>4 | 10 | 6,<br>4      | 580,<br>3252 | 2 | 3<br>3,<br>8 | 0            | 20 | F20:<br>280<br>2 | 103 | 112 | N1:Deamidation (NQ):35.17                                                                  |
| 15 | 7  | P198<br>23 | K.MKQTVE.A                                   | Y | 26,<br>57 | 734,<br>3633      | 6  | 6,<br>3      | 735,<br>3752 | 1 | 2<br>2,<br>4 | 4,58E+<br>05 | 19 | F19:<br>179<br>0 | 326 | 331 |                                                                                            |
| 15 | 7  | P198<br>23 | Q.DFLSK.D                                    | Y | 25,<br>71 | 608,<br>317       | 5  | 1,<br>4      | 609,<br>3251 | 1 | 2<br>9,<br>3 | 4,05E+<br>07 | 19 | F19:<br>246<br>6 | 567 | 571 |                                                                                            |
| 15 | 7  | P198<br>23 | H.FFAP(+31.99)D(+15.99)N(+15.99)LDPIPK.N     | Y | 25,<br>52 | 1436<br>,682<br>3 | 12 | -<br>3,<br>3 | 719,<br>346  | 2 | 3<br>1,<br>3 | 1,13E+<br>06 | 20 | F20:<br>258<br>7 | 298 | 309 | P4:Dihydroxy:23.70;D5:Oxidation or Hydroxylation:10.22;N6:Oxidation or Hydroxylation:13.67 |
| 52 | 12 | P198<br>27 | K.AAISGENAGLVR.A                             | Y | 76,<br>25 | 1156<br>,62       | 12 | 3,<br>6      | 579,<br>3193 | 2 | 2<br>7,<br>3 | 7,71E+<br>07 | 20 | F20:<br>222<br>4 | 126 | 137 |                                                                                            |

|    |    |            |                           |   |           |                   |    |         |                   |   |               |              |    |                  |     |     |                    |                                   |
|----|----|------------|---------------------------|---|-----------|-------------------|----|---------|-------------------|---|---------------|--------------|----|------------------|-----|-----|--------------------|-----------------------------------|
| 52 | 12 | P198<br>27 | R.GHM(+31.99)LENHVER.L    | Y | 69,<br>03 | 1252<br>,561<br>9 | 10 | 7,<br>4 | 627,<br>2928      | 2 | 2<br>2,<br>7  | 1,05E+<br>07 | 20 | F20:<br>179<br>0 | 555 | 564 | Dioxidation<br>(M) | M3:Dioxidation<br>(M):1000.0<br>0 |
| 52 | 12 | P198<br>27 | R.GHM(+15.99)LENHVER.L    | Y | 68,<br>49 | 1236<br>,566<br>9 | 10 | 7       | 619,<br>295       | 2 | 2<br>2,<br>3  | 3,78E+<br>07 | 20 | F20:<br>175<br>7 | 555 | 564 | Oxidation<br>(M)   | M3:Oxidation<br>(M):1000.0<br>0   |
| 52 | 12 | P198<br>27 | R.FPLYNLGFGHN(+.98)VD.F   | Y | 58,<br>34 | 1492<br>,698<br>6 | 13 | 2,<br>8 | 747,<br>3586      | 2 | 7,<br>7,<br>5 | 6,98E+<br>06 | 19 | F19:<br>326<br>4 | 428 | 440 |                    | N11:Deamidation<br>(NQ):42.99     |
| 52 | 12 | P198<br>27 | R.GHMLNENHVER.L           | Y | 57,<br>14 | 1220<br>,572      | 10 | 5,<br>7 | 407,<br>8669      | 3 | 3,<br>3,<br>9 | 3,25E+<br>06 | 21 | F21:<br>191<br>1 | 555 | 564 |                    |                                   |
| 52 | 12 | P198<br>27 | R.GRFPLYNLGFG.H           | Y | 55,<br>95 | 1239<br>,64       | 11 | 3,<br>7 | 620,<br>8296      | 2 | 7,<br>7,<br>9 | 1,92E+<br>07 | 19 | F19:<br>329<br>9 | 426 | 436 |                    |                                   |
| 52 | 12 | P198<br>27 | R.GRFPLYNLGFGHN(+.98)VD.F | Y | 51,<br>38 | 1705<br>,821<br>2 | 15 | 4,<br>1 | 853,<br>9213      | 2 | 3<br>6,<br>4  | 7,39E+<br>06 | 19 | F19:<br>316<br>4 | 426 | 440 |                    | N13:Deamidation<br>(NQ):95.35     |
| 52 | 12 | P198<br>27 | R.ERGHM(+15.99)LENHVER.L  | Y | 47,<br>05 | 1521<br>,710<br>7 | 12 | 4,<br>9 | 381,<br>4368      | 4 | 2<br>2,<br>7  | 3,11E+<br>06 | 20 | F20:<br>178<br>7 | 553 | 564 | Oxidation<br>(M)   | M5:Oxidation<br>(M):1000.0<br>0   |
| 52 | 12 | P198<br>27 | R.KAAISGENAGLV.R          | Y | 47,<br>03 | 1128<br>,613<br>9 | 12 | 7,<br>4 | 565,<br>3184      | 2 | 7,<br>7,<br>9 | 9,76E+<br>06 | 20 | F20:<br>228<br>6 | 125 | 136 |                    |                                   |
| 52 | 12 | P198<br>27 | G.FVTPLTMSIR.G            | Y | 46,<br>8  | 1250<br>,669<br>3 | 11 | 2,<br>6 | 626,<br>3436      | 2 | 3<br>5,<br>4  | 8,35E+<br>06 | 19 | F19:<br>307<br>6 | 602 | 612 |                    |                                   |
| 52 | 12 | P198<br>27 | G.FVTPLTSM(+15.99)SIR.G   | Y | 45,<br>72 | 1266<br>,664<br>2 | 11 | 9,<br>2 | 634,<br>3452      | 2 | 3<br>0,<br>4  | 1,28E+<br>07 | 21 | F21:<br>251<br>7 | 602 | 612 | Oxidation<br>(M)   | M8:Oxidation<br>(M):1000.0<br>0   |
| 52 | 12 | P198<br>27 | F.VTPLTMSIR.G             | Y | 45,<br>48 | 1103<br>,600<br>8 | 10 | 1,<br>5 | 552,<br>8085      | 2 | 2,<br>2,<br>4 | 3,27E+<br>06 | 19 | F19:<br>278<br>5 | 603 | 612 |                    |                                   |
| 52 | 12 | P198<br>27 | R.JYEDHDATQQLQGF.Y        | Y | 44,<br>9  | 1663<br>,747<br>8 | 14 | 9,<br>7 | 832,<br>8893      | 2 | 0,<br>0,<br>3 | 2,50E+<br>07 | 20 | F20:<br>250<br>7 | 458 | 471 |                    |                                   |
| 52 | 12 | P198<br>27 | R.GRFPLYNLGF.G            | Y | 44,<br>59 | 1182<br>,618<br>5 | 10 | 4,<br>3 | 592,<br>3191      | 2 | 5,<br>5,<br>6 | 3,17E+<br>05 | 20 | F20:<br>294<br>5 | 426 | 435 |                    |                                   |
| 52 | 12 | P198<br>27 | R.FPLYNLGFG.H             | N | 41,<br>48 | 1026<br>,517<br>5 | 9  | 6       | 1027<br>,530<br>9 | 1 | 9,<br>7       | 5,17E+<br>06 | 19 | F19:<br>345<br>2 | 428 | 436 |                    |                                   |
| 52 | 12 | P198<br>27 | K.SPSGK.K                 | N | 35,<br>07 | 524,<br>2595      | 5  | 4,<br>7 | 525,<br>2692      | 1 | 1,<br>1,<br>6 | 1,64E+<br>05 | 19 | F19:<br>172<br>5 | 224 | 228 |                    |                                   |
| 52 | 12 | P198<br>27 | K.AAISGENAGLV             | Y | 34,<br>95 | 901,<br>4505      | 10 | 9,<br>2 | 902,<br>4661      | 1 | 8,<br>4       | 1,57E+<br>06 | 21 | F21:<br>233<br>6 | 126 | 135 |                    |                                   |
| 52 | 12 | P198<br>27 | K.VTAWK.Q                 | Y | 33,<br>18 | 603,<br>338       | 5  | 5,<br>2 | 302,<br>6779      | 2 | 4,<br>5       | 1,39E+<br>07 | 21 | F21:<br>196<br>7 | 117 | 121 |                    |                                   |
| 52 | 12 | P198<br>27 | R.GRFPLYNLG               | Y | 32,<br>43 | 978,<br>5287      | 8  | 7,<br>3 | 490,<br>2752      | 2 | 3,<br>3,<br>1 | 9,13E+<br>05 | 20 | F20:<br>274<br>8 | 426 | 433 |                    |                                   |
| 52 | 12 | P198<br>27 | R.KAAISGE.N               | Y | 32,<br>1  | 674,<br>3599      | 7  | 3,<br>6 | 675,<br>3696      | 1 | 8,<br>5       | 2,32E+<br>05 | 19 | F19:<br>146<br>9 | 125 | 131 |                    |                                   |
| 52 | 12 | P198<br>27 | R.GHM(+15.99)LENHVERLW    | Y | 31,<br>75 | 1349<br>,651      | 11 | 6,<br>6 | 450,<br>8939      | 3 | 2<br>5,<br>7  | 1,29E+<br>06 | 20 | F20:<br>207<br>7 | 555 | 565 | Oxidation<br>(M)   | M3:Oxidation<br>(M):1000.0<br>0   |
| 52 | 12 | P198<br>27 | K.NVVVFVID.I              | Y | 31,<br>67 | 804,<br>4381      | 7  | 2,<br>2 | 805,<br>4471      | 1 | 3<br>6,<br>7  | 5,22E+<br>06 | 19 | F19:<br>319<br>8 | 292 | 298 |                    |                                   |
| 52 | 12 | P198<br>27 | K.DKVTAW(+15.99)K.Q       | Y | 31,<br>14 | 862,<br>4548      | 7  | 5,<br>9 | 432,<br>2372      | 2 | 2<br>4,<br>1  | 1,61E+<br>06 | 20 | F20:<br>191<br>9 | 115 | 121 | Oxidation<br>(HW)  | W6:Oxidation<br>(HW):1000<br>.00  |
| 52 | 12 | P198<br>27 | K.AAISGENAGLV.R           | Y | 29,<br>56 | 1000<br>,518      | 11 | 11      | 1001<br>,536      | 1 | 2<br>9,       | 1,12E+<br>06 | 21 | F21:<br>246      | 126 | 136 |                    |                                   |





|    |    |            |                                    |    |           |                   |    |         |                   |   |              |              |          |              |              |              |              |                  |                  |                  |     |                                                                                                                |                  |                                                                               |
|----|----|------------|------------------------------------|----|-----------|-------------------|----|---------|-------------------|---|--------------|--------------|----------|--------------|--------------|--------------|--------------|------------------|------------------|------------------|-----|----------------------------------------------------------------------------------------------------------------|------------------|-------------------------------------------------------------------------------|
|    |    | 033        |                                    | 78 | ,819<br>5 |                   | 3  | 4196    | 8,<br>7           |   | 06           |              |          |              |              |              |              | 337<br>1         |                  |                  |     |                                                                                                                |                  |                                                                               |
| 45 | 22 | Q06<br>033 | R.NAIGGKFLYNLGFGNN.L               | Y  | 56,<br>52 | 1794<br>,905<br>3 | 17 | 6,<br>8 | 898,<br>466       | 2 | 3<br>5,<br>2 | 0            |          |              |              |              |              | F21:<br>292<br>0 | 21               | 414              | 430 |                                                                                                                |                  |                                                                               |
| 45 | 22 | Q06<br>033 | K.KGHVSFKPSLDQQR.S                 | Y  | 56,<br>08 | 1625<br>,863<br>8 | 14 | 3,<br>2 | 542,<br>9636      | 3 | 2<br>9,<br>2 | 1,24E+<br>06 |          |              |              |              |              | F19:<br>245<br>1 | 19               | 221              | 234 |                                                                                                                |                  |                                                                               |
| 45 | 22 | Q06<br>033 | M.LTDGDANVGESRPEK.I                | Y  | 43,<br>18 | 1586<br>,753<br>5 | 15 | 9,<br>7 | 794,<br>3917      | 2 | 2<br>4,<br>5 | 9,44E+<br>06 |          |              |              |              |              | F21:<br>196<br>6 | 21               | 393              | 407 |                                                                                                                |                  |                                                                               |
| 45 | 22 | Q06<br>033 | K.FPLYNLGFG.N                      | N  | 41,<br>48 | 1026<br>,517<br>5 | 9  | 6       | 1027<br>,530<br>9 | 1 | 3<br>9,<br>7 | 5,17E+<br>06 |          |              |              |              |              | F19:<br>345<br>2 | 19               | 420              | 428 |                                                                                                                |                  |                                                                               |
| 45 | 22 | Q06<br>033 | T.YDVNR.E                          | Y  | 39,<br>28 | 665,<br>3133      | 5  | 4,<br>5 | 333,<br>6654      | 2 | 1<br>9,<br>4 | 3,20E+<br>05 |          |              |              |              |              | F20:<br>152<br>8 | 20               | 252              | 256 |                                                                                                                |                  |                                                                               |
| 45 | 22 | Q06<br>033 | K.EVSFDVELPK.T                     | Y  | 38,<br>31 | 1161<br>,591<br>7 | 10 | 7       | 581,<br>8072      | 2 | 2<br>2,<br>8 | 0            |          |              |              |              |              | F20:<br>271<br>9 | 20               | 76               | 85  |                                                                                                                |                  |                                                                               |
| 45 | 22 | Q06<br>033 | K.IQENVR.N                         | Y  | 36,<br>54 | 757,<br>4082      | 6  | 5,<br>2 | 379,<br>7133      | 2 | 2<br>1,<br>9 | 1,18E+<br>06 |          |              |              |              |              | F20:<br>172<br>8 | 20               | 408              | 413 |                                                                                                                |                  |                                                                               |
| 45 | 22 | Q06<br>033 | K.SFSGK.K                          | N  | 35,<br>07 | 524,<br>2595      | 5  | 4,<br>7 | 525,<br>2692      | 1 | 2<br>1,<br>6 | 1,64E+<br>05 |          |              |              |              |              | F19:<br>172<br>5 | 19               | 216              | 220 |                                                                                                                |                  |                                                                               |
| 45 | 22 | Q06<br>033 | F.ITNDLLGSALTK.S                   | Y  | 32,<br>09 | 1244<br>,697<br>6 | 12 | 7,<br>3 | 623,<br>3607      | 2 | 3<br>1,<br>9 | 0            |          |              |              |              |              | F20:<br>264<br>1 | 20               | 204              | 215 |                                                                                                                |                  |                                                                               |
| 45 | 22 | Q06<br>033 | R.LWAYLT.I                         | N  | 28,<br>1  | 765,<br>4061      | 6  | 3,<br>9 | 766,<br>4164      | 1 | 3<br>6,<br>7 | 1,81E+<br>06 |          |              |              |              |              | F19:<br>319<br>0 | 19               | 557              | 562 |                                                                                                                |                  |                                                                               |
| 45 | 22 | Q06<br>033 | K.VQPK(-1.03)Q(+.98)LVKHFE.I       | Y  | 26,<br>48 | 1351<br>,713<br>5 | 11 | 9,<br>8 | 676,<br>8707      | 2 | 3<br>2,<br>4 | 1,26E+<br>07 |          |              |              |              |              | F19:<br>278<br>6 | 19               | 173              | 183 | K4:Lysine<br>oxidation<br>to<br>aminoadip<br>ic<br>semialdeh<br>yde:33.81;<br>Q5:Deami<br>nation<br>(NQ):19.16 |                  |                                                                               |
| 84 | 62 | Q08<br>380 | K.YSSDYFQAPSDYR.Y                  | Y  | 80,<br>92 | 1597<br>,668<br>5 | 13 | 9       | 799,<br>8487      | 2 | 3<br>0,<br>3 | 8,85E+05     |          |              |              |              |              | F3:2<br>474      | 3                | 442              | 454 |                                                                                                                |                  |                                                                               |
| 84 | 62 | Q08<br>380 | R.RGPLVK.Y                         | Y  | 26,<br>98 | 668,<br>4333      | 6  | 4,<br>9 | 335,<br>2256      | 2 | 2<br>1,<br>7 | 3,50E+04     |          |              |              |              |              | F11:<br>172<br>1 | 11               | 436              | 441 |                                                                                                                |                  |                                                                               |
| 20 | 10 | Q12<br>805 | R.SVPSDFIQATTIYANTINTFR.I          | Y  | 92,<br>62 | 2599<br>,328<br>1 | 23 | 7,<br>5 | 1300<br>,681      | 2 | 4<br>2,<br>2 | 6,19E+05     | 2,57E+05 | 3,80E+<br>05 | 3,53E+0<br>6 | 2,36E+0<br>6 | 6,12E+0<br>6 | 2,65E+0<br>6     | 7,32E+0<br>5     | 8,37E+<br>06     | 81  | 405                                                                                                            | 427              |                                                                               |
| 20 | 10 | Q12<br>805 | R.EHIVDEMLTVSSIGTFR.T              | Y  | 86,<br>7  | 2046<br>,045<br>5 | 18 | 6,<br>4 | 1024<br>,036<br>6 | 2 | 4<br>0,<br>3 |              |          |              |              |              |              | 5,59E+<br>05     | 77               | 254              | 477 |                                                                                                                |                  |                                                                               |
| 20 | 10 | Q12<br>805 | R.QTSPVAM(+15.99)LVLVK.S           | Y  | 72,<br>37 | 1387<br>,774<br>4 | 13 | 6,<br>3 | 694,<br>8989      | 2 | 3<br>2,<br>1 | 3,07E+06     | 1,53E+06 | 8,00E+0<br>5 |              | 1,59E+0<br>6 |              | 1,67E+<br>06     | 2                | F2:2<br>623      | 441 | 453                                                                                                            | Oxidation<br>(M) | M8:Oxidat<br>ion<br>(M):1000.0<br>0                                           |
| 20 | 10 | Q12<br>805 | R.IPSNPSHR.I                       | Y  | 71,<br>32 | 906,<br>4672      | 8  | 0,<br>4 | 454,<br>2411      | 2 | 1<br>3,<br>5 | 2,07E+06     | 2,17E+06 | 1,72E+<br>06 |              |              |              |                  | F15:<br>102<br>7 | 15               | 149 | 156                                                                                                            |                  |                                                                               |
| 20 | 10 | Q12<br>805 | K.SGNENGEFYLR.Q                    | Y  | 71,<br>07 | 1284<br>,573<br>5 | 11 | 8,<br>4 | 643,<br>2994      | 2 | 3<br>2,<br>7 | 4,10E+06     | 9,58E+05 | 0            | 2,65E+0<br>6 | 2,13E+0<br>6 | 0            | 4,27E+0<br>6     | 0                | 0                | 63  | 430                                                                                                            | 440              |                                                                               |
| 20 | 10 | Q12<br>805 | R.QTSPVSAMLVLVK.S                  | Y  | 69,<br>49 | 1371<br>,779<br>5 | 13 | 3,<br>6 | 686,<br>8995      | 2 | 3<br>8,<br>8 | 3,19E+06     | 1,19E+06 |              |              |              |              |                  | F1:3<br>264      | 1                | 441 | 453                                                                                                            |                  |                                                                               |
| 20 | 10 | Q12<br>805 | R.TSSYLQY(-2.02)QCVN(+15.99)EPGK.F | Y  | 65,<br>46 | 1832<br>,770<br>9 | 16 | 7,<br>9 | 917,<br>4         | 2 | 3<br>2,<br>3 | 0            | 1,12E+07 | 5,31E+<br>06 | 1,06E+0<br>7 | 7,18E+0<br>6 |              | 3,72E+0<br>6     | 5,32E+0<br>6     | F29:<br>188<br>0 | 29  | 300                                                                                                            | 315              | Y8:2-<br>amino-3-<br>oxo-<br>butanoic_<br>acid:22.37;<br>N12:Oxida<br>tion or |



|    |    |         |                                 |   |         |             |    |      |             |   |         |          |           |           |           |           |           |           |            |            |            |                                          |                                        |                            |  |
|----|----|---------|---------------------------------|---|---------|-------------|----|------|-------------|---|---------|----------|-----------|-----------|-----------|-----------|-----------|-----------|------------|------------|------------|------------------------------------------|----------------------------------------|----------------------------|--|
| 20 | 10 | Q12 805 | R.ELPQSIYKY                     | Y | 47, 2   | 1075, 591 3 | 9  | 7, 1 | 538, 8068   | 2 | 2, 9, 9 | 4,14E+06 | 1,26E+06  |           |           |           |           | 2         | F2:2 438   | 388        | 396        | Hydroxylat ion:55.92                     |                                        |                            |  |
| 20 | 10 | Q12 805 | R.RNPADPQR.I                    | Y | 46, 2   | 952, 4838   | 8  | 1, 1 | 477, 2487   | 2 | 2, 1, 7 | 0        | 0         |           |           |           |           | 14        | F14: 843   | 141        | 148        |                                          |                                        |                            |  |
| 20 | 10 | Q12 805 | R.TSSVLR.L                      | Y | 37, 47  | 661, 3759   | 6  | 0, 5 | 331, 695    | 2 | 2, 6, 8 | 1,16E+06 | 1,86E+05  | 0         |           |           |           | 4         | F4:1 359   | 478        | 483        |                                          |                                        |                            |  |
| 20 | 10 | Q12 805 | K.YMSIR.S                       | Y | 36, 31  | 668, 3315   | 5  | 3, 2 | 669, 3409   | 1 | 1, 9, 1 | 0        |           |           |           |           |           | 1         | F1:2 367   | 397        | 401        |                                          |                                        |                            |  |
| 20 | 10 | Q12 805 | K.YM(+15.99)SIR.S               | Y | 34, 32  | 684, 3265   | 5  | 5, 7 | 343, 1725   | 2 | 2, 3, 3 | 1,72E+05 | 1,03E+05  |           |           |           |           | 11        | F11: 185 4 | 397        | 401        | Oxidation (M) M2:Oxidat ion (M):1000.0 0 |                                        |                            |  |
| 20 | 10 | Q12 805 | A.VAGPEMQTGR(+15.99).N          | Y | 34, 04  | 1060, 497 1 | 10 | 9    | 531, 2606   | 2 | 2, 7, 4 |          | 1,50E+0 4 | 3,29E+0 4 | 2,41E+0 5 | 4,54E+0 5 | 1,31E+0 5 | 7,22E+ 05 | 57         | F57: 150 6 | 125        | 134                                      | R10:Oxidat ion or Hydroxylat ion:68.95 |                            |  |
| 20 | 10 | Q12 805 | S.PVSAMLVLVK.S                  | Y | 34      | 1055, 641 2 | 10 | 4, 1 | 528, 8301   | 4 | 2, 2, 3 |          |           | 0         |           |           |           | 25        | F25: 256 0 | 444        | 453        |                                          |                                        |                            |  |
| 20 | 10 | Q12 805 | Y.ILTPENR.C                     | Y | 32, 37  | 841, 4658   | 7  | 5, 3 | 421, 7424   | 2 | 2, 5, 9 | 1,46E+06 |           |           |           |           |           | 3         | F3:2 094   | 370        | 376        |                                          |                                        |                            |  |
| 20 | 10 | Q12 805 | N.TINTFR.I                      | Y | 31, 25  | 750, 4024   | 6  | 8, 8 | 751, 4163   | 1 | 1, 6, 2 | 1,12E+06 |           |           |           |           |           | 3         | F3:2 122   | 422        | 427        |                                          |                                        |                            |  |
| 20 | 10 | Q12 805 | K.SLSGPR.E                      | Y | 31, 24  | 615, 334    | 6  | 5, 2 | 616, 3445   | 1 | 1, 9, 1 | 2,91E+05 |           |           |           |           |           | 2         | F2:1 527   | 454        | 459        |                                          |                                        |                            |  |
| 20 | 10 | Q12 805 | R.EHIVDLEM(+15.99)LTVSSIGTFR.T  | Y | 26, 15  | 2062, 040 5 | 18 | 6, 7 | 688, 3587   | 3 | 3, 5, 9 | 6,86E+05 |           |           |           |           |           | 3         | F3:2 929   | 460        | 477        | Oxidation (M) M8:Oxidat ion (M):1000.0 0 |                                        |                            |  |
| 8  | 2  | Q16 610 | R.NVALVSGDTENAK.G               | Y | 10, 0,8 | 1316, 657 2 | 13 | 5, 1 | 659, 3392   | 2 | 2, 0, 6 | 8,11E+07 | 7,12E+07  | 5,11E+ 07 | 9,61E+0 7 | 3,91E+0 7 | 3,43E+0 7 | 1,04E+0 8 | 3,64E+0 7  | 6,01E+ 07  | 81         | F81: 173 2                               | 506                                    | 518                        |  |
| 8  | 2  | Q16 610 | K.GQGEQSGTGTNISSTSEPKKE         | Y | 10, 0   | 2178, 951 2 | 22 | 6, 4 | 1090, 489 9 | 2 | 2, 8, 8 |          | 1,61E+05  | 3,00E+ 05 | 1,50E+0 6 | 2,19E+0 6 | 2,04E+0 6 | 5,36E+ 04 | 42         | F42: 158 2 | 519        | 540                                      |                                        |                            |  |
| 8  | 2  | Q16 610 | R.QHVYVGPWNLPOSSYSHLTR.Q        | Y | 86, 14  | 2368, 171 1 | 20 | 5, 9 | 1185, 099 9 | 3 | 2, 5, 3 | 2,47E+07 | 1,57E+07  | 9,79E+0 7 | 8,33E+0 7 | 4,63E+0 7 | 1,29E+0 8 | 6,94E+0 7 | 8,63E+ 07  | 54         | F54: 212 2 | 186                                      | 205                                    |                            |  |
| 8  | 2  | Q16 610 | R.QGETLNFLEIGYSR.C              | Y | 85, 65  | 1625, 804 9 | 14 | 5, 4 | 813, 9141   | 2 | 2, 3, 8 | 4,72E+07 | 3,87E+07  | 1,17E+ 07 | 5,98E+0 7 | 3,03E+0 7 | 9,96E+0 6 | 5,14E+0 7 | 3,35E+0 7  | 1,02E+ 07  | 30         | F30: 235 7                               | 206                                    | 219                        |  |
| 8  | 2  | Q16 610 | R.ELLAIQLER.E                   | Y | 79, 91  | 1196, 712 9 | 10 | 6, 9 | 599, 3679   | 2 | 2, 5, 5 | 2,15E+07 | 1,62E+07  | 7,25E+ 06 | 2,49E+0 7 | 1,19E+0 7 | 8,38E+0 6 | 2,51E+0 7 | 9,76E+0 6  | 6,69E+ 06  | 11         | F11: 288 4                               | 334                                    | 343                        |  |
| 8  | 2  | Q16 610 | R.Q(+.98)HVYVGPWNLPOSSYSHLTR. Q | Y | 77, 54  | 2369, 155 3 | 20 | 0, 2 | 790, 7255   | 3 | 2, 2, 8 | 2,20E+07 | 7,63E+06  | 3,02E+ 06 |           |           |           |           |            | 5          | F5:2 894   | 186                                      | 205                                    | Q1:Deami dation (NQ):98.53 |  |
| 8  | 2  | Q16 610 | K.ELPSLQHPNEQK.E                | Y | 76, 04  | 1418, 715 3 | 12 | 2, 4 | 710, 3666   | 2 | 2, 0, 6 | 4,87E+07 | 4,21E+07  | 3,01E+ 07 | 6,15E+0 7 | 3,76E+0 7 | 2,88E+0 7 | 5,67E+0 7 | 3,52E+0 7  | 2,70E+ 07  | 17         | F17: 170 4                               | 116                                    | 127                        |  |
| 8  | 2  | Q16 610 | W.NLPQSSYSHLTR.Q                | Y | 75, 77  | 1401, 700 1 | 12 | 4, 9 | 701, 8607   | 2 | 2, 0, 7 | 1,06E+07 | 3,64E+06  | 1,21E+ 07 | 2,57E+0 7 | 1,46E+0 7 | 1,85E+0 7 | 1,00E+0 7 | 1,18E+0 7  | 2,44E+ 07  | 16         | F16: 172 8                               | 194                                    | 205                        |  |
| 8  | 2  | Q16 610 | R.NLPATDPLQR.E                  | Y | 73, 99  | 1123, 598 5 | 10 | 5, 7 | 562, 8098   | 2 | 2, 9, 3 | 1,01E+08 | 1,00E+08  | 7,74E+ 07 | 4,33E+0 7 | 1,70E+0 4 | 4,64E+0 6 | 3,88E+0 7 | 2,25E+ 07  | 2          | F2:2 389   | 324                                      | 333                                    |                            |  |
| 8  | 2  | Q16 610 | A.ASEGGFTATGQR.Q                | Y | 73, 52  | 1180, 547 2 | 12 | 7, 3 | 591, 2852   | 2 | 2, 5, 4 | 2,73E+06 | 2,48E+06  | 1,68E+ 06 |           |           |           |           |            | 2          | F2:2 049   | 20                                       | 31                                     |                            |  |
| 8  | 2  | Q16 610 | R.APYPNYDR.D                    | Y | 73, 48  | 994, 4508   | 8  | 0, 8 | 498, 2323   | 2 | 2, 6, 6 | 7,25E+06 | 1,37E+07  | 6,02E+ 06 | 4,17E+0 6 |           |           | 3,89E+0 6 | 3,59E+ 06  | 24         | F24: 224 9 | 400                                      | 407                                    |                            |  |
| 8  | 2  | Q16 610 | R.QHVYVGPWNLPOSSYSH.L           | Y | 72, 98  | 1997, 938   | 17 | 6, 9 | 999, 9833   | 2 | 2, 3, 5 |          |           | 4,65E+0 6 | 2,34E+0 6 |           | 6,30E+0 6 | 1,72E+0 6 | 1,97E+ 06  | 30         | F30: 210   | 186                                      | 202                                    |                            |  |

|   |   |            |                           |   |           |                          |    |         |                   |   |              |              |          | 4            |              |              |              |              |              |                  |     |                  |                                        |     | 8                                |                  |                  |     |     |                  |     |     |
|---|---|------------|---------------------------|---|-----------|--------------------------|----|---------|-------------------|---|--------------|--------------|----------|--------------|--------------|--------------|--------------|--------------|--------------|------------------|-----|------------------|----------------------------------------|-----|----------------------------------|------------------|------------------|-----|-----|------------------|-----|-----|
| 8 | 2 | Q16<br>610 | R.SQGGWGH.R               | Y | 72,<br>54 | 883,<br>4049             | 8  | 0,<br>4 | 442,<br>7096      | 2 | 1<br>3,<br>2 | 7,89E+06     | 3,37E+06 | 3,78E+<br>06 |              |              |              |              |              |                  | 24  | F24:<br>993      | 156                                    | 163 |                                  |                  |                  |     |     |                  |     |     |
| 8 | 2 | Q16<br>610 | K.LVWEEAMSR.F             | Y | 72,<br>18 | 1119<br>,538<br>2        | 9  | 1,<br>6 | 560,<br>7773      | 2 | 3<br>2,<br>2 | 1,14E+07     | 2,50E+06 | 0            | 6,59E+0<br>6 | 3,82E+0<br>6 |              |              |              |                  |     | 13               | F13:<br>276<br>8                       | 235 | 243                              |                  |                  |     |     |                  |     |     |
| 8 | 2 | Q16<br>610 | K.EVGPPLPQEA.VLQK.E       | Y | 71,<br>85 | 1600<br>893<br>,882<br>4 | 15 | 7,<br>2 | 801,<br>4543      | 2 | 3<br>4,<br>8 | 1,99E+07     | 1,47E+07 | 4,62E+<br>06 | 3,27E+0<br>7 | 2,09E+0<br>7 | 5,32E+0<br>6 | 3,45E+0<br>7 | 2,27E+0<br>7 | 3,41E+<br>06     | 7   | F7:2<br>119      | 101                                    | 115 |                                  |                  |                  |     |     |                  |     |     |
| 8 | 2 | Q16<br>610 | R.QHVYVYGPWNLPQSSY.S      | Y | 71,<br>11 | 1773<br>,847<br>4        | 15 | 5,<br>6 | 887,<br>9359      | 2 | 3<br>6,<br>9 | 4,01E+06     |          | 1,09E+<br>06 | 1,42E+0<br>7 | 5,75E+0<br>6 | 6,20E+0<br>6 | 1,72E+0<br>7 | 8,26E+0<br>6 | 8,35E+<br>06     | 64  | F64:<br>226<br>7 | 186                                    | 200 |                                  |                  |                  |     |     |                  |     |     |
| 8 | 2 | Q16<br>610 | E.LPFPVPTLDNIK.N          | Y | 70,<br>51 | 1506<br>,844<br>6        | 14 | 2,<br>6 | 754,<br>4315      | 2 | 3<br>8,<br>2 | 1,55E+06     | 2,89E+06 |              |              |              |              |              |              |                  |     |                  |                                        |     | 1                                | F1:3<br>210      | 297              | 310 |     |                  |     |     |
| 8 | 2 | Q16<br>610 | E.LPSLQHPNEQK.E           | Y | 70,<br>1  | 1289<br>,672<br>7        | 11 | 1,<br>4 | 645,<br>8445      | 2 | 2<br>9,<br>3 | 4,16E+06     | 3,84E+06 |              |              |              |              |              |              |                  |     |                  |                                        |     | 1                                | F1:2<br>391      | 117              | 127 |     |                  |     |     |
| 8 | 2 | Q16<br>610 | L.PQSSYSHLTR.Q            | Y | 67,<br>83 | 1174<br>,573<br>1        | 10 | 6,<br>2 | 588,<br>2975      | 2 | 3<br>0,<br>7 | 1,47E+06     | 1,66E+06 | 5,81E+<br>06 | 2,21E+0<br>7 | 1,73E+0<br>7 | 1,48E+0<br>7 | 2,23E+0<br>7 | 1,81E+0<br>7 | 1,63E+<br>07     | 63  | F63:<br>175<br>8 | 196                                    | 205 |                                  |                  |                  |     |     |                  |     |     |
| 8 | 2 | Q16<br>610 | R.RAPYPNYDR.D             | Y | 67,<br>73 | 1150<br>,551<br>9        | 9  | 0,<br>1 | 576,<br>2831      | 2 | 2<br>5,<br>6 | 7,00E+06     | 1,57E+07 | 1,11E+<br>07 | 3,28E+0<br>7 | 2,44E+0<br>7 | 4,07E+0<br>7 | 5,42E+0<br>7 | 4,09E+0<br>7 | 3,49E+<br>07     | 13  | F13:<br>212<br>4 | 399                                    | 407 |                                  |                  |                  |     |     |                  |     |     |
| 8 | 2 | Q16<br>610 | R.HPPSPTR.D               | Y | 65,<br>73 | 790,<br>4086             | 7  | 0,<br>4 | 396,<br>2114      | 2 | 1<br>1,<br>4 | 8,88E+06     | 5,25E+06 | 5,18E+<br>06 |              |              |              |              |              |                  |     |                  |                                        |     |                                  | 24               | F24:<br>828      | 386 | 392 |                  |     |     |
| 8 | 2 | Q16<br>610 | A.SEGGFATGQR.Q            | Y | 65,<br>4  | 1109<br>,510<br>1        | 11 | 8,<br>7 | 555,<br>7672      | 2 | 2<br>4,<br>7 | 1,27E+06     | 1,66E+06 | 7,45E+<br>05 |              |              |              |              |              |                  |     |                  |                                        |     |                                  | 20               | F20:<br>197<br>5 | 21  | 31  |                  |     |     |
| 8 | 2 | Q16<br>610 | R.SLPMDDHPDSSQHGPPFE.G    | Y | 64,<br>08 | 1876<br>,804<br>9        | 17 | 4,<br>2 | 939,<br>4137      | 2 | 2<br>2,<br>3 | 2,39E+06     | 6,42E+06 |              |              |              |              |              |              |                  |     |                  |                                        |     | 10                               | F10:<br>267<br>4 | 54               | 70  |     |                  |     |     |
| 8 | 2 | Q16<br>610 | L.PSLQHPNEQK.E            | Y | 62,<br>86 | 1176<br>,588<br>7        | 10 | 5,<br>4 | 589,<br>3048      | 2 | 0,<br>5      | 2,48E+06     | 3,54E+06 | 3,11E+<br>06 | 1,10E+0<br>7 | 1,17E+0<br>7 | 5,21E+0<br>6 | 1,06E+0<br>7 | 1,18E+0<br>7 | 3,26E+<br>06     | 38  | F38:<br>173<br>3 | 118                                    | 127 |                                  |                  |                  |     |     |                  |     |     |
| 8 | 2 | Q16<br>610 | D.ISSGLELPPVPTLDNIK.N     | Y | 62,<br>79 | 2093<br>,140<br>9        | 20 | 9,<br>4 | 1047<br>,587<br>5 | 2 | 4<br>1       | 5,68E+05     | 1,04E+06 | 2,17E+<br>05 |              | 3,93E+0<br>4 |              | 1,60E+0<br>5 |              | 6,74E+<br>05     | 26  | F26:<br>259<br>0 | 291                                    | 310 |                                  |                  |                  |     |     |                  |     |     |
| 8 | 2 | Q16<br>610 | R.DILTDIGR.V              | Y | 62,<br>24 | 1014<br>,570<br>9        | 9  | 5       | 508,<br>2953      | 2 | 6,<br>7      | 3,10E+06     | 3,54E+06 | 2,30E+0<br>6 |              | 6,24E+0<br>5 | 2,00E+0<br>6 |              |              |                  |     |                  |                                        |     |                                  |                  |                  |     | 55  | F55:<br>226<br>1 | 408 | 416 |
| 8 | 2 | Q16<br>610 | L.PATDPLQRE               | Y | 62,<br>02 | 896,<br>4716             | 8  | 1,<br>2 | 449,<br>2436      | 2 | 3<br>3,<br>2 | 2,07E+07     | 1,25E+07 | 6,50E+<br>06 | 7,58E+0<br>7 | 3,36E+0<br>7 | 3,17E+0<br>7 | 6,68E+0<br>7 | 2,82E+0<br>7 | 4,33E+<br>07     | 75  | F75:<br>181<br>3 | 326                                    | 333 |                                  |                  |                  |     |     |                  |     |     |
| 8 | 2 | Q16<br>610 | R.APYPNYDRDILTDIGR.V      | Y | 61,<br>17 | 1991<br>,011<br>2        | 17 | 0,<br>1 | 996,<br>513       | 2 | 4<br>4,<br>4 | 0            |          | 2,93E+<br>06 |              |              |              |              |              |                  |     |                  |                                        |     |                                  | 13               | F13:<br>296<br>2 | 400 | 416 |                  |     |     |
| 8 | 2 | Q16<br>610 | K.EVGPPLPQ(+.98)EAVPLQK.E | Y | 59,<br>77 | 1601<br>,866<br>5        | 15 | 6,<br>3 | 801,<br>9456      | 2 | 3<br>5,<br>6 | 3,87E+<br>06 |          | 1,07E+0<br>7 |              |              |              |              |              | 1,28E+<br>07     | 74  | F74:<br>214<br>2 | 101                                    | 115 | Q8:Deami<br>dation<br>(NQ):59.68 |                  |                  |     |     |                  |     |     |
| 8 | 2 | Q16<br>610 | R.NVALVSGDTE(+.98)AK.G    | Y | 59,<br>32 | 1317<br>,641<br>2        | 13 | 8,<br>7 | 659,<br>8336      | 2 | 3<br>0,<br>8 | 1,63E+0<br>6 |          |              |              |              |              | 4,49E+<br>05 | 55           | F55:<br>175<br>3 | 506 | 518              | N11:Deam<br>idation<br>(NQ):100.4<br>5 |     |                                  |                  |                  |     |     |                  |     |     |
| 8 | 2 | Q16<br>610 | E.LLALIQLER.E             | Y | 58,<br>93 | 1067<br>,670<br>3        | 9  | 3,<br>1 | 534,<br>8441      | 2 | 7,<br>4      | 1,22E+06     | 1,59E+06 |              |              |              |              |              |              |                  |     |                  |                                        |     | 1                                | F1:3<br>147      | 335              | 343 |     |                  |     |     |
| 8 | 2 | Q16<br>610 | F.PPGVPTLDNIK.N           | Y | 58,<br>48 | 1149<br>,639<br>3        | 11 | 4,<br>5 | 575,<br>8295      | 2 | 8,<br>1      | 1,04E+06     | 2,14E+06 | 1,81E+<br>06 | 1,16E+0<br>6 | 3,75E+0<br>6 | 6,88E+0<br>6 | 1,64E+0<br>6 | 1,81E+0<br>6 | 4,14E+<br>06     | 74  | F74:<br>235<br>7 | 300                                    | 310 |                                  |                  |                  |     |     |                  |     |     |
| 8 | 2 | Q16<br>610 | K.AWEDTLDK.Y              | Y | 57,<br>58 | 976,<br>4501             | 8  | 0,<br>1 | 977,<br>4573      | 1 | 9,<br>6      | 0            |          |              |              |              |              |              |              |                  |     |                  |                                        | 15  | F15:<br>257<br>4                 | 361              | 368              |     |     |                  |     |     |
| 8 | 2 | Q16<br>610 | R.NLPATDPLQRE.L           | Y | 57,<br>45 | 1252<br>,641<br>1        | 11 | 2,<br>9 | 627,<br>3297      | 2 | 1,<br>5      | 3,61E+06     | 2,19E+06 | 3,31E+<br>06 |              |              |              |              |              |                  |     |                  |                                        |     |                                  | 19               | F19:<br>269<br>2 | 324 | 334 |                  |     |     |
| 8 | 2 | Q16<br>610 | E.EAPQPHYQLR.A            | Y | 55,<br>74 | 1237<br>,620<br>4        | 10 | 2       | 619,<br>8187      | 2 | 8,<br>7      | 7,22E+06     | 8,59E+06 | 7,54E+<br>05 |              |              |              |              |              |                  |     |                  |                                        |     |                                  | 10               | F10:<br>233<br>0 | 273 | 282 |                  |     |     |
| 8 | 2 | Q16<br>610 | R.NVALVSGDTE.N            | Y | 55,<br>16 | 1003<br>,482             | 10 | 2,<br>7 | 1004<br>,492      | 1 | 3<br>0,      | 2,10E+06     |          |              |              |              |              |              |              |                  |     |                  |                                        | 10  | F10:<br>254                      | 506              | 515              |     |     |                  |     |     |

|   |   |            |                                               |   |           |                   |    |         |              |   |              |          |              |              |              |              |                  |                  |     |                                                |                                                                                                                         |     |                                                      |
|---|---|------------|-----------------------------------------------|---|-----------|-------------------|----|---------|--------------|---|--------------|----------|--------------|--------------|--------------|--------------|------------------|------------------|-----|------------------------------------------------|-------------------------------------------------------------------------------------------------------------------------|-----|------------------------------------------------------|
| 8 | 2 | Q16<br>610 | K.LLPAQLPAEK.E                                | Y | 53,<br>18 | 1078<br>,638<br>5 | 10 | 7,<br>6 | 540,<br>3306 | 2 | 3<br>0,<br>1 | 1,28E+07 | 1,45E+07     | 9,86E+<br>06 |              | 2            | F2:2<br>458      | 91               | 100 |                                                |                                                                                                                         |     |                                                      |
| 8 | 2 | Q16<br>610 | A.APP(+15.99)SPPLSR.S                         | Y | 52,<br>41 | 936,<br>5028      | 9  | 2,<br>1 | 469,<br>2596 | 2 | 2<br>7,<br>9 | 2,99E+06 | 3,08E+06     |              |              | 10           | F10:<br>225<br>7 | 45               | 53  | P3:Oxidati<br>on or<br>Hydroxylat<br>ion:26.02 |                                                                                                                         |     |                                                      |
| 8 | 2 | Q16<br>610 | E.GGFTATGQR.Q                                 | Y | 52,<br>07 | 893,<br>4355      | 9  | 3,<br>7 | 447,<br>7267 | 2 | 2<br>6,<br>9 | 2,13E+05 |              |              |              | 1            | F1:2<br>160      | 23               | 31  |                                                |                                                                                                                         |     |                                                      |
| 8 | 2 | Q16<br>610 | N.LPATDPLQR.E                                 | Y | 51,<br>37 | 1009<br>,555<br>6 | 9  | 6,<br>1 | 505,<br>7881 | 2 | 3<br>2,<br>7 |          | 3,55E+0<br>5 | 1,50E+0<br>5 | 7,48E+0<br>5 | 1,58E+<br>06 | 58               | F58:<br>189<br>3 | 325 | 333                                            |                                                                                                                         |     |                                                      |
| 8 | 2 | Q16<br>610 | S.LQHPNEQK.E                                  | Y | 50,<br>83 | 992,<br>5039      | 8  | 2,<br>2 | 497,<br>2581 | 2 | 1<br>1,<br>7 | 0        | 0            | 0            |              |              | 15               | F15:<br>855      | 120 | 127                                            |                                                                                                                         |     |                                                      |
| 8 | 2 | Q16<br>610 | Y.GPWNLPQSSYSHLTR.Q                           | Y | 50,<br>24 | 1741<br>,853<br>6 | 15 | 7,<br>1 | 871,<br>9403 | 2 | 4,<br>8      |          | 2,28E+0<br>5 |              |              |              | 51               | F51:<br>204<br>8 | 191 | 205                                            |                                                                                                                         |     |                                                      |
| 8 | 2 | Q16<br>610 | L.PAQLPAEK.E                                  | Y | 47,<br>85 | 852,<br>4705      | 8  | 5,<br>8 | 427,<br>245  | 2 | 3,<br>2      |          | 2,77E+0<br>6 |              | 1,43E+<br>05 | 34           | F34:<br>195<br>7 | 93               | 100 |                                                |                                                                                                                         |     |                                                      |
| 8 | 2 | Q16<br>610 | Q.SSYSHLTR.Q                                  | Y | 47,<br>8  | 949,<br>4617      | 8  | 0,<br>6 | 475,<br>7379 | 2 | 9,<br>4      | 1,13E+06 | 3,52E+05     | 8,02E+<br>05 |              | 0            | 4                | F4:1<br>607      | 198 | 205                                            |                                                                                                                         |     |                                                      |
| 8 | 2 | Q16<br>610 | R.APYPNYDRD.I                                 | Y | 47,<br>56 | 1109<br>,477<br>8 | 9  | 2,<br>4 | 555,<br>7475 | 2 | 8,<br>5      |          | 5,75E+05     |              |              |              | 10               | F10:<br>231<br>1 | 400 | 408                                            |                                                                                                                         |     |                                                      |
| 8 | 2 | Q16<br>610 | K.TRPHWCCT(-2.02)R.Q                          | Y | 42,<br>39 | 1156<br>,501<br>8 | 9  | 0,<br>5 | 579,<br>2579 | 2 | 4,<br>7      | 5,97E+06 | 6,05E+06     | 1,59E+<br>06 | 1,00E+0<br>5 | 5,93E+0<br>4 | 1,18E+0<br>5     | 6,05E+0<br>4     | 13  | F13:<br>204<br>2                               | 253                                                                                                                     | 261 | T8:2-<br>amino-3-<br>oxo-<br>butanoic_<br>acid:59.53 |
| 8 | 2 | Q16<br>610 | R.EYAVK.T                                     | Y | 41,<br>78 | 608,<br>317       | 5  | 1,<br>2 | 609,<br>3235 | 1 | 1<br>4       | 1,22E+06 | 2,24E+06     | 7,21E+<br>05 |              |              | 24               | F24:<br>106<br>6 | 373 | 377                                            |                                                                                                                         |     |                                                      |
| 8 | 2 | Q16<br>610 | S.EGGFTATGQR.Q                                | Y | 41,<br>39 | 1022<br>,478<br>1 | 10 | 7,<br>8 | 512,<br>2503 | 2 | 4,<br>4      |          |              | 6,62E+<br>05 |              |              | 20               | F20:<br>195<br>2 | 22  | 31                                             |                                                                                                                         |     |                                                      |
| 8 | 2 | Q16<br>610 | E.APQPHYQLR.A                                 | Y | 40,<br>63 | 1108<br>,577<br>8 | 9  | 2,<br>3 | 555,<br>2974 | 2 | 8,<br>6      | 1,97E+05 |              |              |              |              | 1                | F1:2<br>322      | 274 | 282                                            |                                                                                                                         |     |                                                      |
| 8 | 2 | Q16<br>610 | R.NVALVSGDTENAKG.Q                            | Y | 40,<br>18 | 1373<br>,678<br>6 | 14 | 3,<br>5 | 687,<br>8442 | 2 | 7,<br>9      |          |              | 0            |              |              | 23               | F23:<br>239<br>6 | 506 | 519                                            |                                                                                                                         |     |                                                      |
| 8 | 2 | Q16<br>610 | N.LPQSSYSHLTR.Q                               | Y | 39,<br>84 | 1287<br>,657<br>1 | 11 | 6,<br>1 | 644,<br>8398 | 2 | 0,<br>8      |          |              | 0            |              |              | 27               | F27:<br>175<br>9 | 195 | 205                                            |                                                                                                                         |     |                                                      |
| 8 | 2 | Q16<br>610 | R.QHVYVYGP(-<br>30.01)W(+13.98)NLPQSSYSHLTR.Q | Y | 39,<br>41 | 2352<br>,139<br>9 | 20 | 0,<br>8 | 785,<br>0545 | 3 | 3<br>3,<br>8 |          | 0            | 9,15E+<br>04 |              |              | 22               | F22:<br>292<br>8 | 186 | 205                                            | Tryptophan<br>oxidation<br>to<br>oxolactone                                                                             |     |                                                      |
| 8 | 2 | Q16<br>610 | G.PPLPQEAIVPLQK.E                             | Y | 39,<br>01 | 1315<br>,749<br>9 | 12 | 5,<br>5 | 658,<br>8859 | 2 | 5,<br>2      |          |              | 1,10E+0<br>6 |              |              | 66               | F66:<br>212<br>6 | 104 | 115                                            | P7:Proline<br>oxidation<br>to<br>pyrrolidino<br>ne:28.70;<br>W8:Tryptophan<br>oxidation<br>to<br>oxolactone<br>:1000.00 |     |                                                      |
| 8 | 2 | Q16<br>610 | K.ELPSLQHPN(+.98)EQK.E                        | Y | 38,<br>4  | 1419<br>,699<br>3 | 12 | 8,<br>3 | 710,<br>8629 | 2 | 1,<br>2      |          | 1,16E+0<br>5 |              | 2,23E+<br>05 | 77           | F77:<br>178<br>5 | 116              | 127 | N9:Deami<br>dation<br>(NQ):28.64               |                                                                                                                         |     |                                                      |
| 8 | 2 | Q16<br>610 | R.RNIWR.D                                     | Y | 37,<br>94 | 743,<br>4191      | 5  | 0,<br>3 | 372,<br>7169 | 2 | 1<br>9,<br>5 | 8,81E+04 | 7,28E+04     | 3,50E+<br>04 |              |              | 23               | F23:<br>159<br>1 | 477 | 481                                            |                                                                                                                         |     |                                                      |
| 8 | 2 | Q16<br>610 | R.SQGGWG.H                                    | Y | 37,<br>7  | 590,<br>2449      | 6  | 0,<br>5 | 591,<br>2518 | 1 | 0,<br>4      | 0        | 3,03E+05     | 9,56E+<br>04 |              |              | 24               | F24:<br>166<br>5 | 156 | 161                                            |                                                                                                                         |     |                                                      |
| 8 | 2 | Q16<br>610 | D.ILTIDIGR.V                                  | Y | 37,<br>03 | 899,<br>544       | 8  | 3,<br>1 | 450,<br>7807 | 2 | 3<br>4,      | 5,62E+05 |              |              |              |              | 1                | F1:2<br>920      | 409 | 416                                            |                                                                                                                         |     |                                                      |

|   |   |            |                                                      |   |           |                   |    |              |                   |   |              |          |              |              |  |    |                  |     |     |                                                                                                                                                       |
|---|---|------------|------------------------------------------------------|---|-----------|-------------------|----|--------------|-------------------|---|--------------|----------|--------------|--------------|--|----|------------------|-----|-----|-------------------------------------------------------------------------------------------------------------------------------------------------------|
| 8 | 2 | Q16<br>610 | K.ELPSLQHPNEQ(+.98)K.E                               | Y | 36,<br>65 | 1419<br>,699<br>3 | 12 | 5,<br>8      | 710,<br>8611      | 2 | 3<br>1,<br>1 |          | 0            |              |  | 50 | F50:<br>174<br>7 | 116 | 127 | Q11:Deam<br>idation<br>(NQ):18.53                                                                                                                     |
| 8 | 2 | Q16<br>610 | K.TRPHW(+13.98)CCTR.Q                                | Y | 36,<br>52 | 1172<br>,496<br>8 | 9  | 1,<br>1      | 587,<br>2563      | 2 | 2<br>7,<br>2 |          | 3,74E+0<br>5 | 4,08E+0<br>5 |  | 59 | F59:<br>147<br>9 | 253 | 261 | Tryptopha<br>n<br>oxidation<br>to<br>oxolactone                                                                                                       |
| 8 | 2 | Q16<br>610 | K.TRPHW(+15.99)CCT(-2.02)R.Q                         | Y | 36,<br>47 | 1172<br>,496<br>8 | 9  | 2,<br>3      | 587,<br>257       | 2 | 2<br>7,<br>7 | 1,22E+04 | 1,84E+0<br>5 |              |  | 65 | F65:<br>153<br>0 | 253 | 261 | WS:Oxidat<br>ion<br>(HW):27.9<br>6;T8:2-<br>amino-3-<br>oxo-<br>butanoic_<br>acid:59.53                                                               |
| 8 | 2 | Q16<br>610 | R.QLRPEHFQEVGYAAP(+15.99)SPPL<br>SR.S                | Y | 35,<br>03 | 2491<br>,260<br>7 | 22 | 9,<br>1      | 623,<br>8281      | 4 | 3<br>0,<br>1 | 4,41E+06 | 2,15E+06     |              |  | 3  | F3:2<br>457      | 32  | 53  | P16:Oxidat<br>ion<br>or<br>Hydroxylat<br>ion:10.11                                                                                                    |
| 8 | 2 | Q16<br>610 | K.TRPHWC(-33.99)C(+31.99)TR.Q                        | Y | 34,<br>99 | 1156<br>,519<br>7 | 9  | -<br>9,<br>9 | 579,<br>2614      | 2 | 2<br>8,<br>5 | 1,54E+06 | 1,97E+<br>06 |              |  | 27 | F27:<br>158<br>3 | 253 | 261 | C6:Dehydr<br>oalanine<br>(C):12.28;C<br>7:Dihydrox<br>y:12.28                                                                                         |
| 8 | 2 | Q16<br>610 | K.TRPHWC(+31.99)C(-33.99)TR.Q                        | Y | 34,<br>81 | 1156<br>,519<br>7 | 9  | -<br>10      | 579,<br>2612      | 2 | 2<br>8,<br>1 | 2,40E+06 |              | 1,18E+0<br>5 |  | 7  | F7:1<br>562      | 253 | 261 | C6:Dihydro<br>xy:0.00;C7:<br>Dehydroal<br>anine<br>(C):0.00                                                                                           |
| 8 | 2 | Q16<br>610 | A.K(+43.01)(+31.99)GQGEQSTGGTN<br>ISSTSEPKKE         | Y | 34,<br>77 | 2382<br>,041<br>7 | 23 | 7,<br>8      | 1192<br>,037<br>5 | 2 | 2<br>9,<br>2 |          |              | 9,11E+0<br>4 |  | 67 | F67:<br>162<br>8 | 518 | 540 | K1:Carbam<br>ylation:10<br>4.22;K1:Di<br>hydroxy:1<br>06.58                                                                                           |
| 8 | 2 | Q16<br>610 | V.WEAMSR.F                                           | Y | 32,<br>3  | 907,<br>3858      | 7  | 5,<br>8      | 454,<br>7028      | 2 | 3<br>4,<br>4 | 1,87E+06 |              |              |  | 7  | F7:2<br>080      | 237 | 243 |                                                                                                                                                       |
| 8 | 2 | Q16<br>610 | K.LVWEE.A                                            | Y | 32,<br>11 | 674,<br>3275      | 5  | 2,<br>4      | 675,<br>3364      | 1 | 3<br>3,<br>6 | 3,59E+06 | 4,57E+06     |              |  | 1  | F1:2<br>805      | 235 | 239 |                                                                                                                                                       |
| 8 | 2 | Q16<br>610 | R.QH(-23.02)VVV(+33.96)GP(-<br>27.99)WNLPQSSYSHLTR.Q | Y | 31,<br>94 | 2351<br>,121<br>3 | 20 | 1,<br>3      | 1176<br>,569<br>5 | 2 | 3<br>3,<br>9 | 0        | 8,64E+05     |              |  | 15 | F15:<br>297<br>4 | 186 | 205 | H2:his2asn<br>:93.20;YS:<br>Chlorinatio<br>n of<br>tyrosine<br>residues:1<br>02.98;P7:P<br>yrrolidone<br>from<br>Proline:82.<br>63                    |
| 8 | 2 | Q16<br>610 | Y.AAPP(+15.99)SPPLSR.S                               | Y | 30,<br>4  | 1007<br>,539<br>9 | 10 | 1,<br>9      | 504,<br>7782      | 2 | 2<br>8,<br>3 | 1,84E+06 |              |              |  | 10 | F10:<br>228<br>8 | 44  | 53  | P4:Oxidati<br>on or<br>Hydroxylat<br>ion:17.01                                                                                                        |
| 8 | 2 | Q16<br>610 | R.APYPN(+.98)YDRDLTIDIGR.V                           | Y | 30,<br>23 | 1991<br>,995<br>2 | 17 | 7,<br>3      | 665,<br>0106      | 3 | 3<br>4,<br>1 |          | 0            |              |  | 23 | F23:<br>299<br>5 | 400 | 416 | NS:Deami<br>dation<br>(NQ):1000.<br>00                                                                                                                |
| 8 | 2 | Q16<br>610 | R.Q(+43.01)HVVVGP(-30.01)WNLP(-<br>30.01)QSSYSHLTR.Q | Y | 29,<br>11 | 2351<br>,156      | 20 | 4,<br>9      | 1176<br>,591<br>1 | 2 | 3<br>6,<br>8 |          |              | 1,28E+0<br>7 |  | 53 | F53:<br>224<br>4 | 186 | 205 | Q1:Carba<br>mylation:1<br>000.00;P7:<br>Proline<br>oxidation<br>to<br>pyrrolidino<br>ne:1000.00<br>;P11:Prolin<br>e<br>oxidation<br>to<br>pyrrolidino |

|    |    |            |                                                |   |           |                   |    |              |                   |   |              |              |    |                  |           |           |                                                                                                                                                                                                                        |
|----|----|------------|------------------------------------------------|---|-----------|-------------------|----|--------------|-------------------|---|--------------|--------------|----|------------------|-----------|-----------|------------------------------------------------------------------------------------------------------------------------------------------------------------------------------------------------------------------------|
| 8  | 2  | Q16<br>610 | K.TRPHW(+15.99)C(+31.99)C(-33.99)TR.Q          | Y | 28,<br>63 | 1172<br>,514<br>5 | 9  | -<br>9,<br>7 | 587,<br>2589      | 2 | 2<br>7,<br>4 | 1,37E+0<br>5 | 63 | F63:<br>151<br>4 | 253       | 261       | ne:1000.00<br>W5:Oxidation<br>(HW):26.0<br>2;C6:Dihydroxy:0.00;<br>C7:Dehydroalanine<br>(C):0.00                                                                                                                       |
| 8  | 2  | Q16<br>610 | R.Q(+.98)HVVY(-2.02)GPWNLQSSYSYHLTR.Q          | Y | 27,<br>38 | 2367<br>,139<br>6 | 20 | 7            | 790,<br>0593      | 3 | 3<br>2,<br>9 | 0            | 12 | F12:<br>267<br>8 | 186       | 205       | Q1:Deamidation<br>(NQ):4.32;<br>Y5:2-amino-3-oxo-<br>butanoic_ acid:59.08                                                                                                                                              |
| 8  | 2  | Q16<br>610 | LIQLER.E                                       | Y | 26,<br>48 | 657,<br>381       | 5  | -<br>1,<br>1 | 329,<br>6974      | 2 | 2<br>5,<br>2 | 8,37E+<br>05 | 23 | F23:<br>212<br>8 | 339       | 343       |                                                                                                                                                                                                                        |
| 8  | 2  | Q16<br>610 | A.LIQLER.E                                     | Y | 26,<br>46 | 770,<br>465       | 6  | 1,<br>2      | 386,<br>2403      | 2 | 2<br>8,<br>5 | 0            | 15 | F15:<br>246<br>6 | 338       | 343       |                                                                                                                                                                                                                        |
| 5  | 40 | Q8W<br>Z42 | K.SPEPR.V                                      | N | 30,<br>49 | 584,<br>2918      | 5  | 1,<br>9      | 585,<br>3002      | 1 | 2<br>9,<br>3 | 4,43E+05     | 1  | F1:2<br>386      | 3359<br>5 | 335<br>99 |                                                                                                                                                                                                                        |
| 5  | 40 | Q8W<br>Z42 | K.VGDTLR.L                                     | N | 29,<br>37 | 659,<br>3602      | 6  | 3,<br>7      | 660,<br>3699      | 1 | 2<br>4,<br>8 | 3,26E+<br>05 | 19 | F19:<br>200<br>3 | 1815<br>9 | 181<br>64 |                                                                                                                                                                                                                        |
| 5  | 40 | Q8W<br>Z42 | L.SWSRPK(-1.03)DDGGSR(+15.99)VTGYIER(+15.99).K | Y | 27,<br>31 | 2359<br>,082<br>8 | 20 | 3,<br>5      | 1180<br>,552<br>7 | 2 | 3<br>2,<br>2 | 2,52E+06     | 18 | F18:<br>184<br>4 | 3127<br>6 | 312<br>95 | Lysine<br>oxidation<br>to<br>aminoadipic<br>semialdehyde<br>K6:Lysine<br>oxidation<br>to<br>aminoadipic<br>semialdehyde:1000.00;<br>R12:Oxidation or<br>Hydroxylation:2.87;<br>R20:Oxidation or<br>Hydroxylation:22.45 |
| 5  | 40 | Q8W<br>Z42 | D.TTETKEVVK.L                                  | Y | 26,<br>94 | 1033<br>,565<br>6 | 9  | 6,<br>2      | 517,<br>7933      | 2 | 2<br>1,<br>2 | 1,85E+<br>05 | 21 | F21:<br>167<br>9 | 1970      | 197<br>8  |                                                                                                                                                                                                                        |
| 5  | 40 | Q8W<br>Z42 | K.K(+43.01)(+14.96)PEAP(+13.98)PPK<br>VPEAPK.E | Y | 25,<br>92 | 1555<br>,788<br>1 | 14 | -<br>1,<br>7 | 519,<br>6024      | 3 | 2<br>9,<br>1 | 0            | 22 | F22:<br>248<br>5 | 1144<br>4 | 114<br>57 | K1:Carbamylation:79.54;<br>K1:Alpha-amino<br>adipic<br>acid:79.54;<br>P5:Proline<br>oxidation<br>to<br>pyroglutamic<br>acid:12.33                                                                                      |
| 47 | 59 | Q9B<br>QS7 | R.HLGLGPIVIR.A                                 | Y | 53,<br>99 | 1073<br>,670<br>9 | 10 | 2            | 537,<br>8438      | 2 | 3<br>4,<br>5 | 6,99E+<br>06 | 19 | F19:<br>298<br>9 | 452       | 461       |                                                                                                                                                                                                                        |
| 71 | 65 | Q9H<br>8M2 | K.IIHAGFK.M                                    | Y | 45,<br>51 | 784,<br>4595      | 7  | 2,<br>7      | 785,<br>4689      | 1 | 2<br>9,<br>3 | 3,13E+<br>07 | 19 | F19:<br>246<br>8 | 229       | 235       |                                                                                                                                                                                                                        |
| 71 | 65 | Q9H<br>8M2 | K.IIHAGF.K                                     | Y | 32,<br>59 | 656,<br>3646      | 6  | 5,<br>4      | 329,<br>1913      | 2 | 2<br>9       | 1,91E+<br>06 | 20 | F20:<br>238<br>3 | 229       | 234       |                                                                                                                                                                                                                        |
